# Supplementary material for: Controls on Palaeogene deep-sea diatom-bearing sediment deposition and comparison with shallow marine environments
Source: Copernicus journal article supplement (doi:10.5194/bg-22-3029-2025), 2025-06-30
Supplement: Supplementary file 32 [file bg-22-3029-2025-supplement.zip]

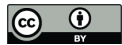

## *Supplement of*

# **Controls on Palaeogene deep-sea diatom-bearing sediment deposition and comparison with shallow marine environments**

**Cécile Figus et al.**

*Correspondence to:* Cécile Figus (cecile.figus@phd.usz.edu.pl)

- bg-22-3029-2025-supplement-title-page.pdf
- Supplementary material
  - map\_straume2023\_GM\_23.00Ma.pdf
  - map\_straume2023\_GM\_24.00Ma.pdf
  - map\_straume2023\_GM\_25.00Ma.pdf
  - map\_straume2023\_GM\_26.00Ma.pdf
  - map\_straume2023\_GM\_27.00Ma.pdf
  - map\_straume2023\_GM\_28.00Ma.pdf
  - map\_straume2023\_GM\_29.00Ma.pdf
  - map\_straume2023\_GM\_30.00Ma.pdf
  - map\_straume2023\_GM\_31.00Ma.pdf
  - map\_straume2023\_GM\_32.00Ma.pdf
  - map\_straume2023\_GM\_33.00Ma.pdf
  - map\_straume2023\_GM\_34.00Ma.pdf
  - map\_straume2023\_GM\_35.00Ma.pdf
  - map\_straume2023\_GM\_36.00Ma.pdf
  - map\_straume2023\_GM\_37.00Ma.pdf
  - map\_straume2023\_GM\_38.00Ma.pdf
  - map\_straume2023\_GM\_39.00Ma.pdf
  - map\_straume2023\_GM\_40.00Ma.pdf
  - map\_straume2023\_GM\_41.00Ma.pdf
  - map\_straume2023\_GM\_42.00Ma.pdf
  - map\_straume2023\_GM\_43.00Ma.pdf
  - map\_straume2023\_GM\_44.00Ma.pdf
  - map\_straume2023\_GM\_45.00Ma.pdf

- map\_straume2023\_GM\_46.00Ma.pdf
- map\_straume2023\_GM\_47.00Ma.pdf
- map\_straume2023\_GM\_48.00Ma.pdf
- map\_straume2023\_GM\_49.00Ma.pdf
- map\_straume2023\_GM\_50.00Ma.pdf
- map\_straume2023\_GM\_51.00Ma.pdf
- map\_straume2023\_GM\_52.00Ma.pdf
- map\_straume2023\_GM\_53.00Ma.pdf
- map\_straume2023\_GM\_54.00Ma.pdf
- map\_straume2023\_GM\_55.00Ma.pdf
- map\_straume2023\_GM\_56.00Ma.pdf
- map\_straume2023\_GM\_57.00Ma.pdf
- map\_straume2023\_GM\_58.00Ma.pdf
- map\_straume2023\_GM\_59.00Ma.pdf
- map\_straume2023\_GM\_60.00Ma.pdf
- map\_straume2023\_GM\_61.00Ma.pdf
- map\_straume2023\_GM\_62.00Ma.pdf
- map\_straume2023\_GM\_63.00Ma.pdf
- map\_straume2023\_GM\_64.00Ma.pdf
- map\_straume2023\_GM\_65.00Ma.pdf

The copyright of individual parts of the supplement might differ from the article licence.
