# Supplementary figures and images for: Controls on Palaeogene deep-sea diatom-bearing sediment deposition and comparison with shallow marine environments
Source: Copernicus journal article supplement (doi:10.5194/bg-22-3029-2025), 2025-06-30

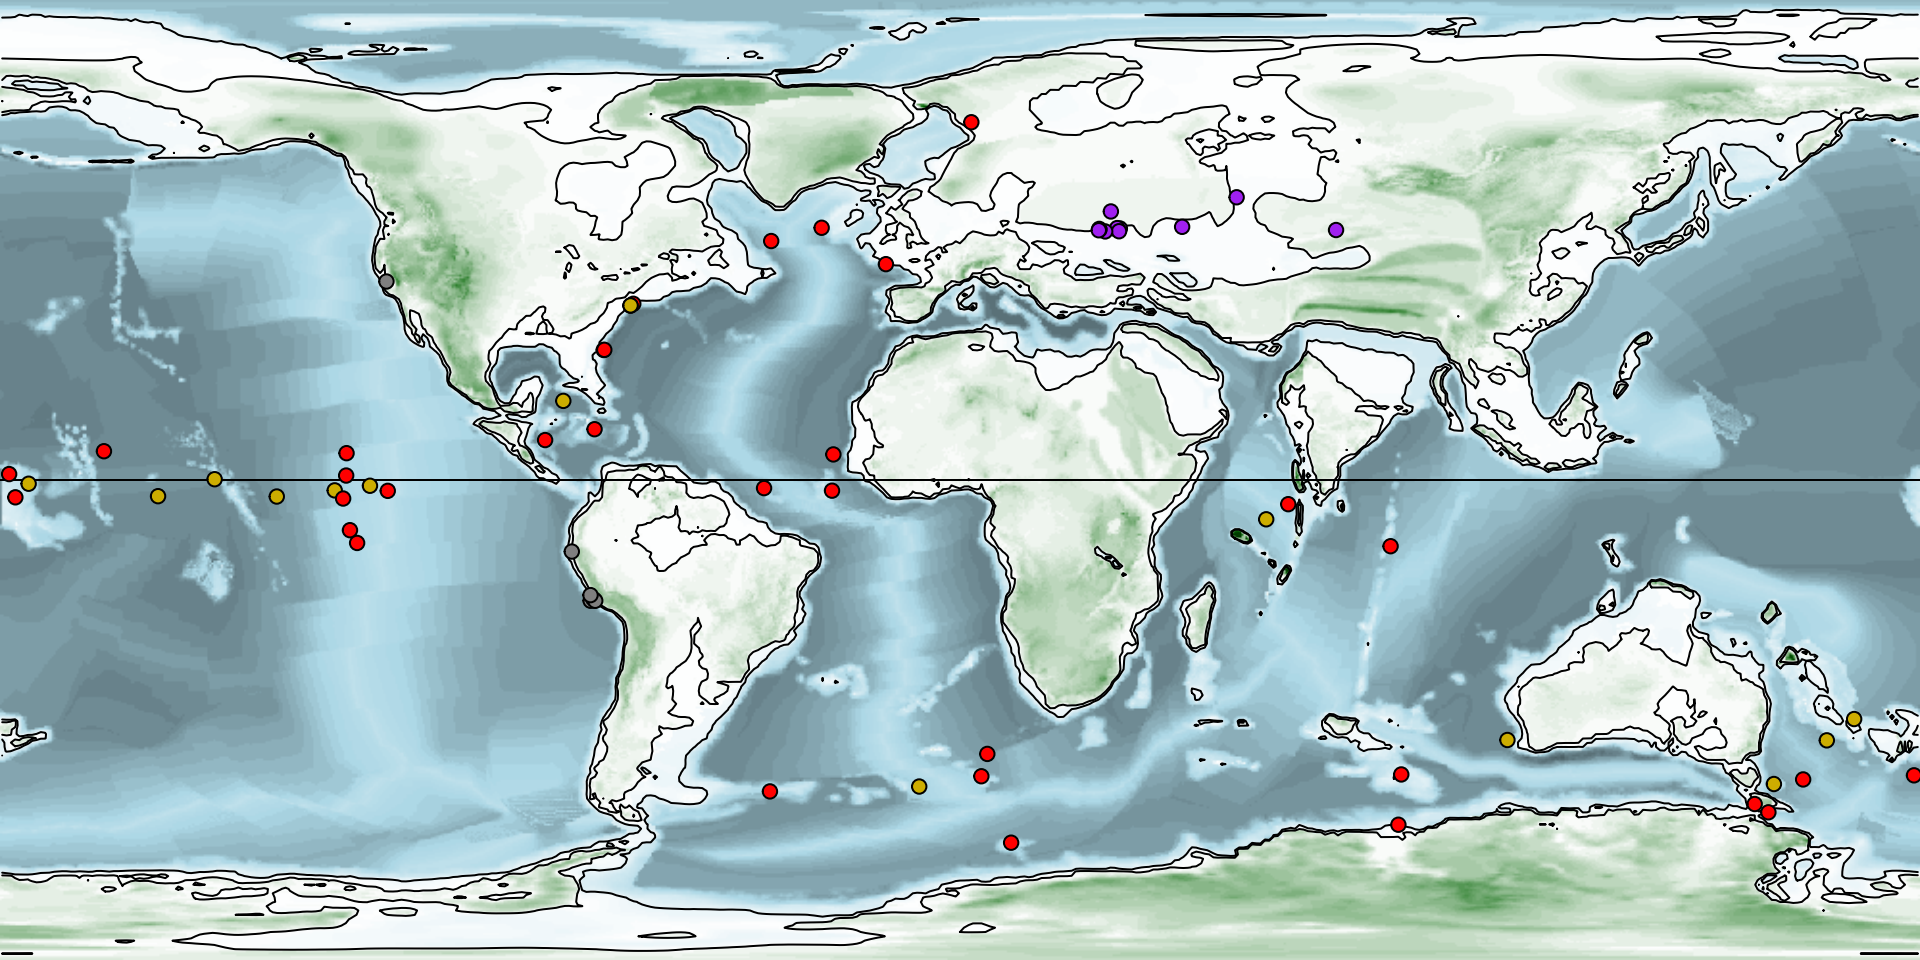

Supplement: Supplementary file 1 [file bg-22-3029-2025-supplement.zip]

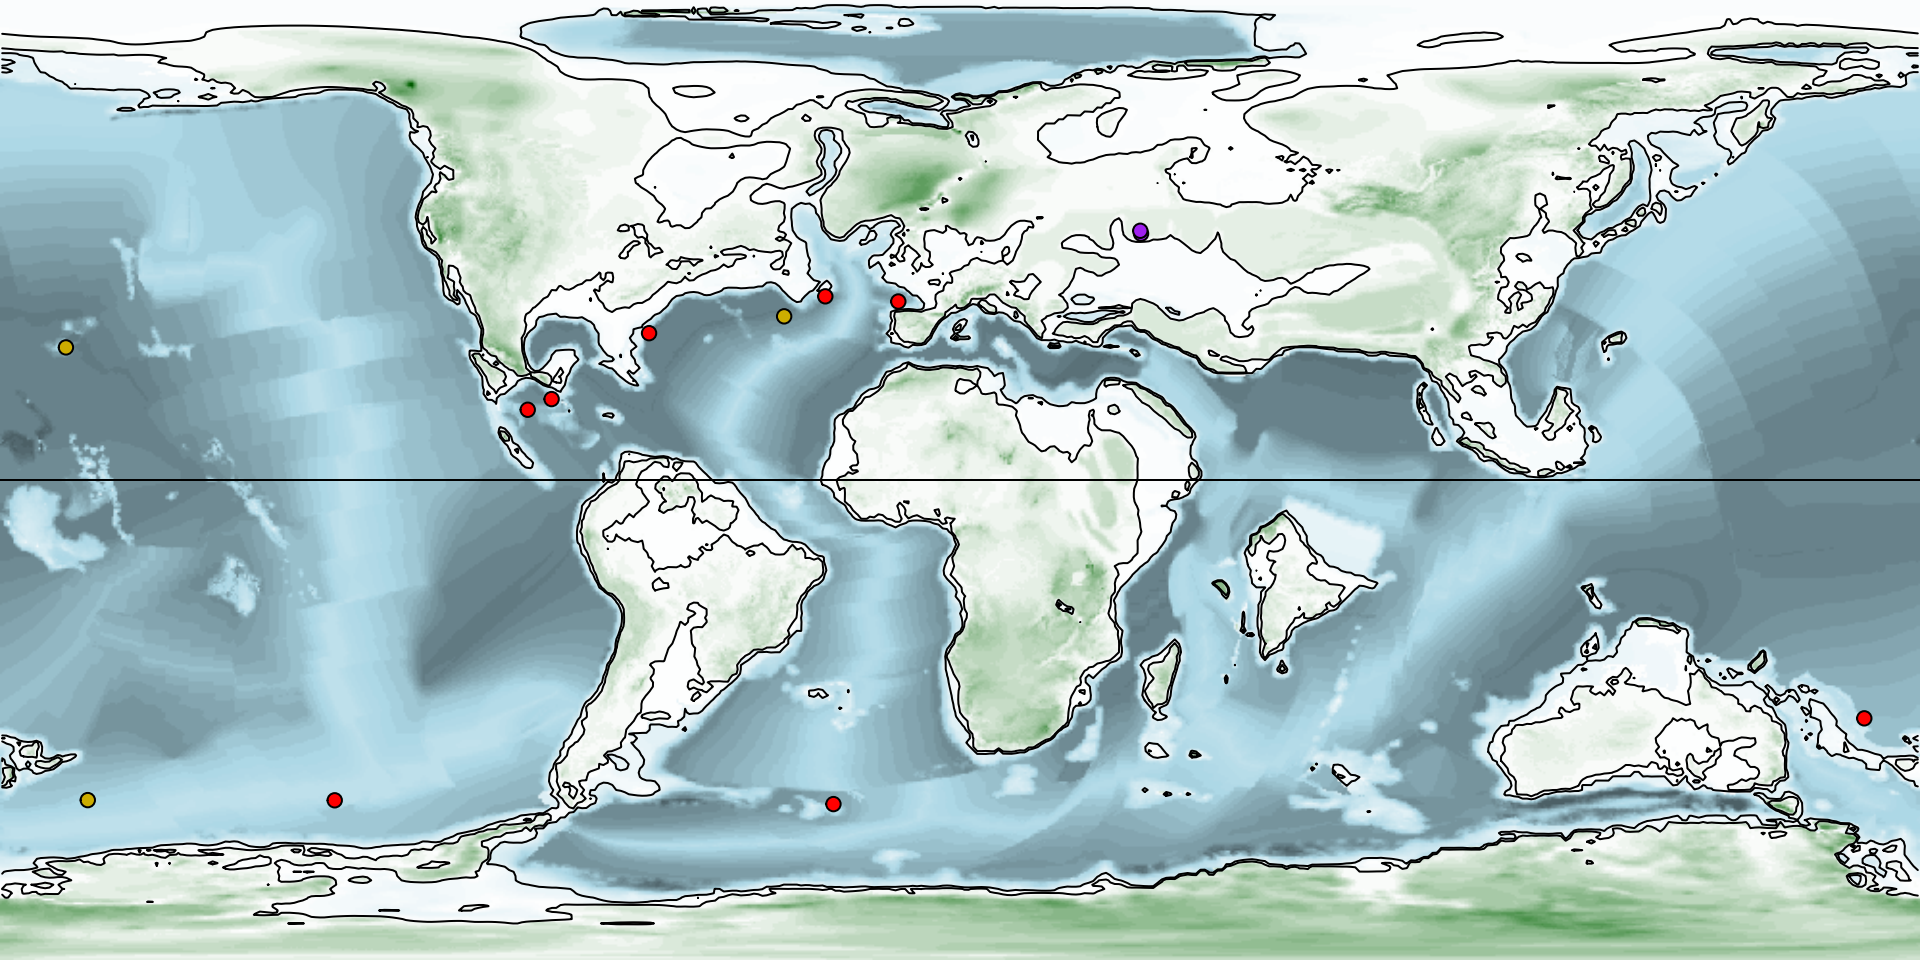

Supplement: Supplementary file 2 [file bg-22-3029-2025-supplement.zip]

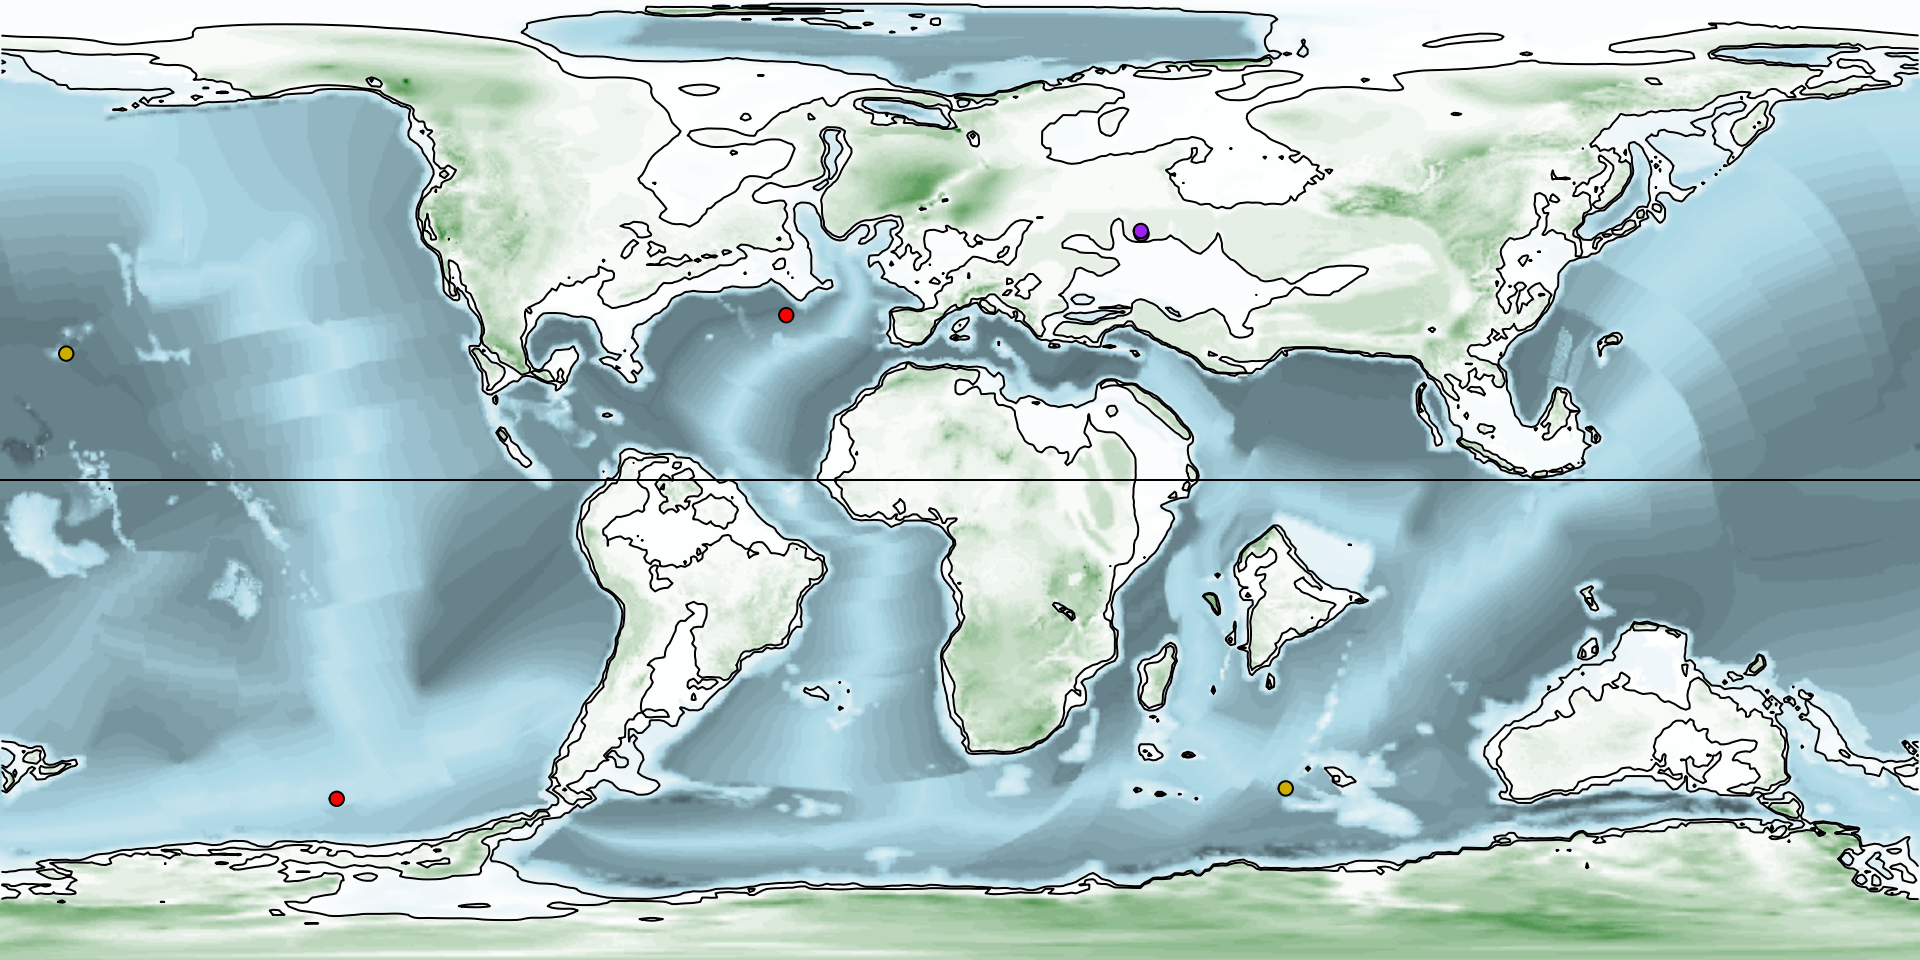

Supplement: Supplementary file 3 [file bg-22-3029-2025-supplement.zip]

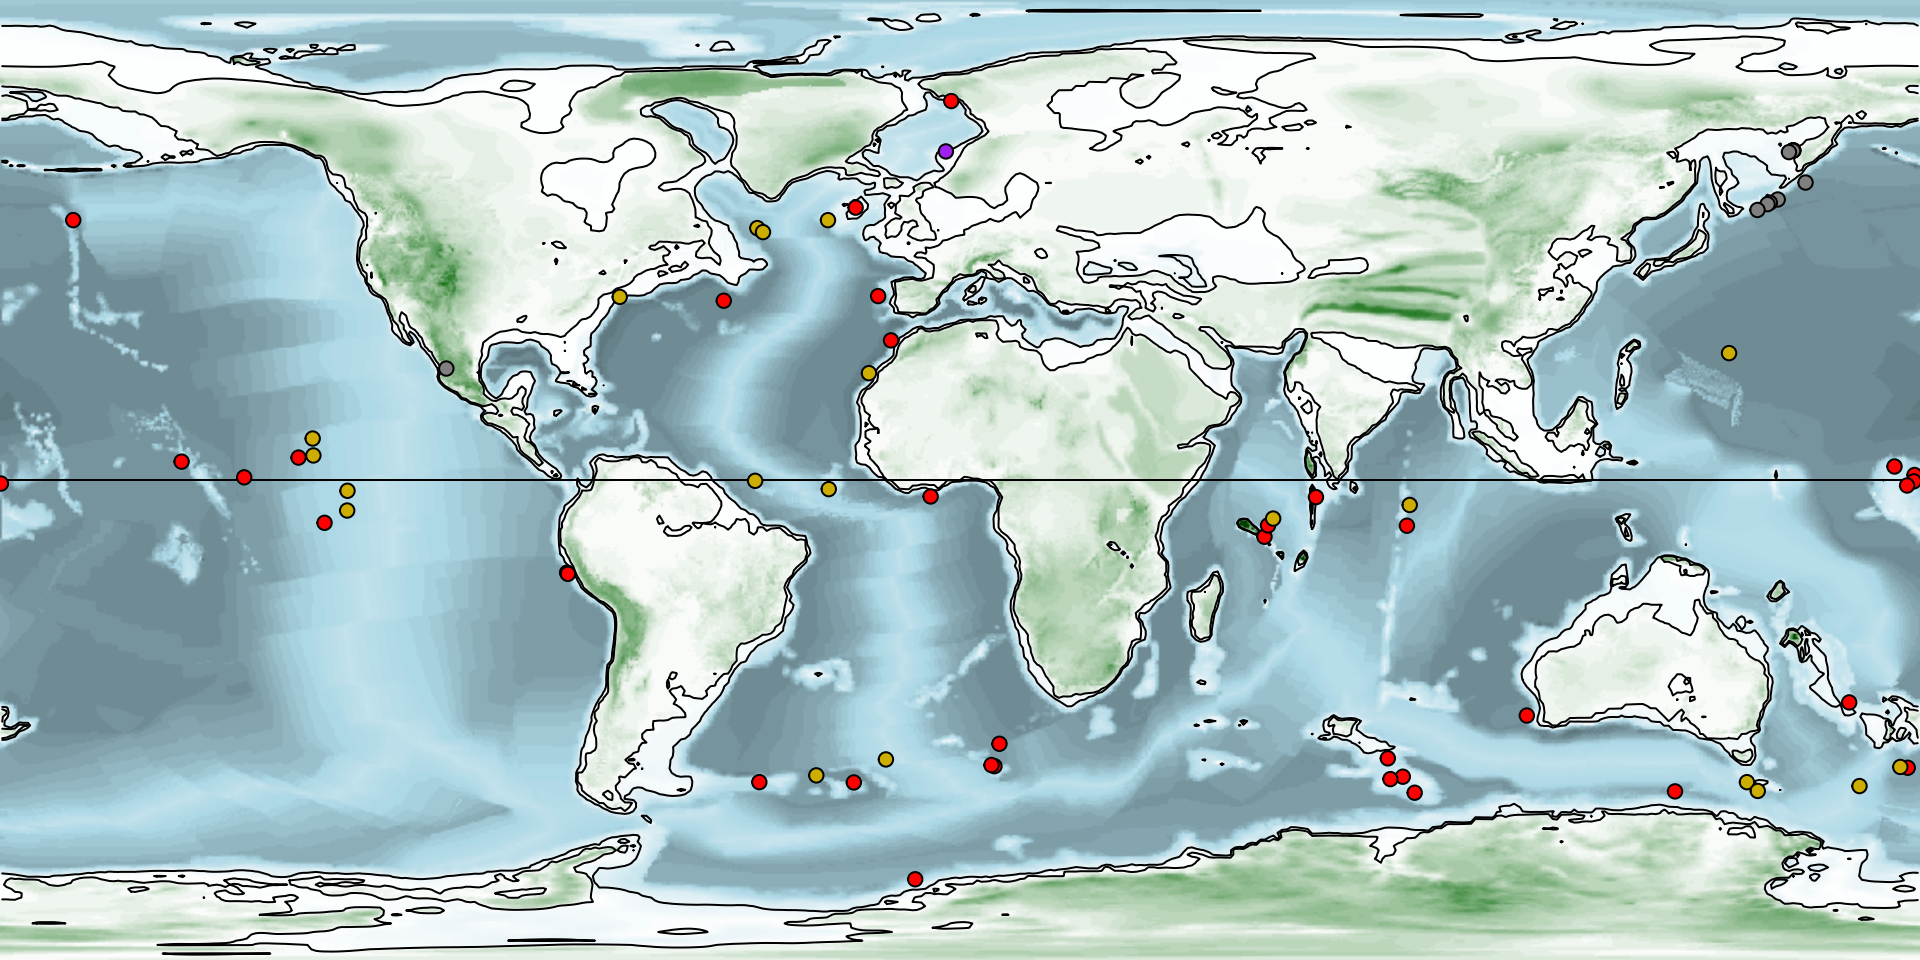

Supplement: Supplementary file 4 [file bg-22-3029-2025-supplement.zip]

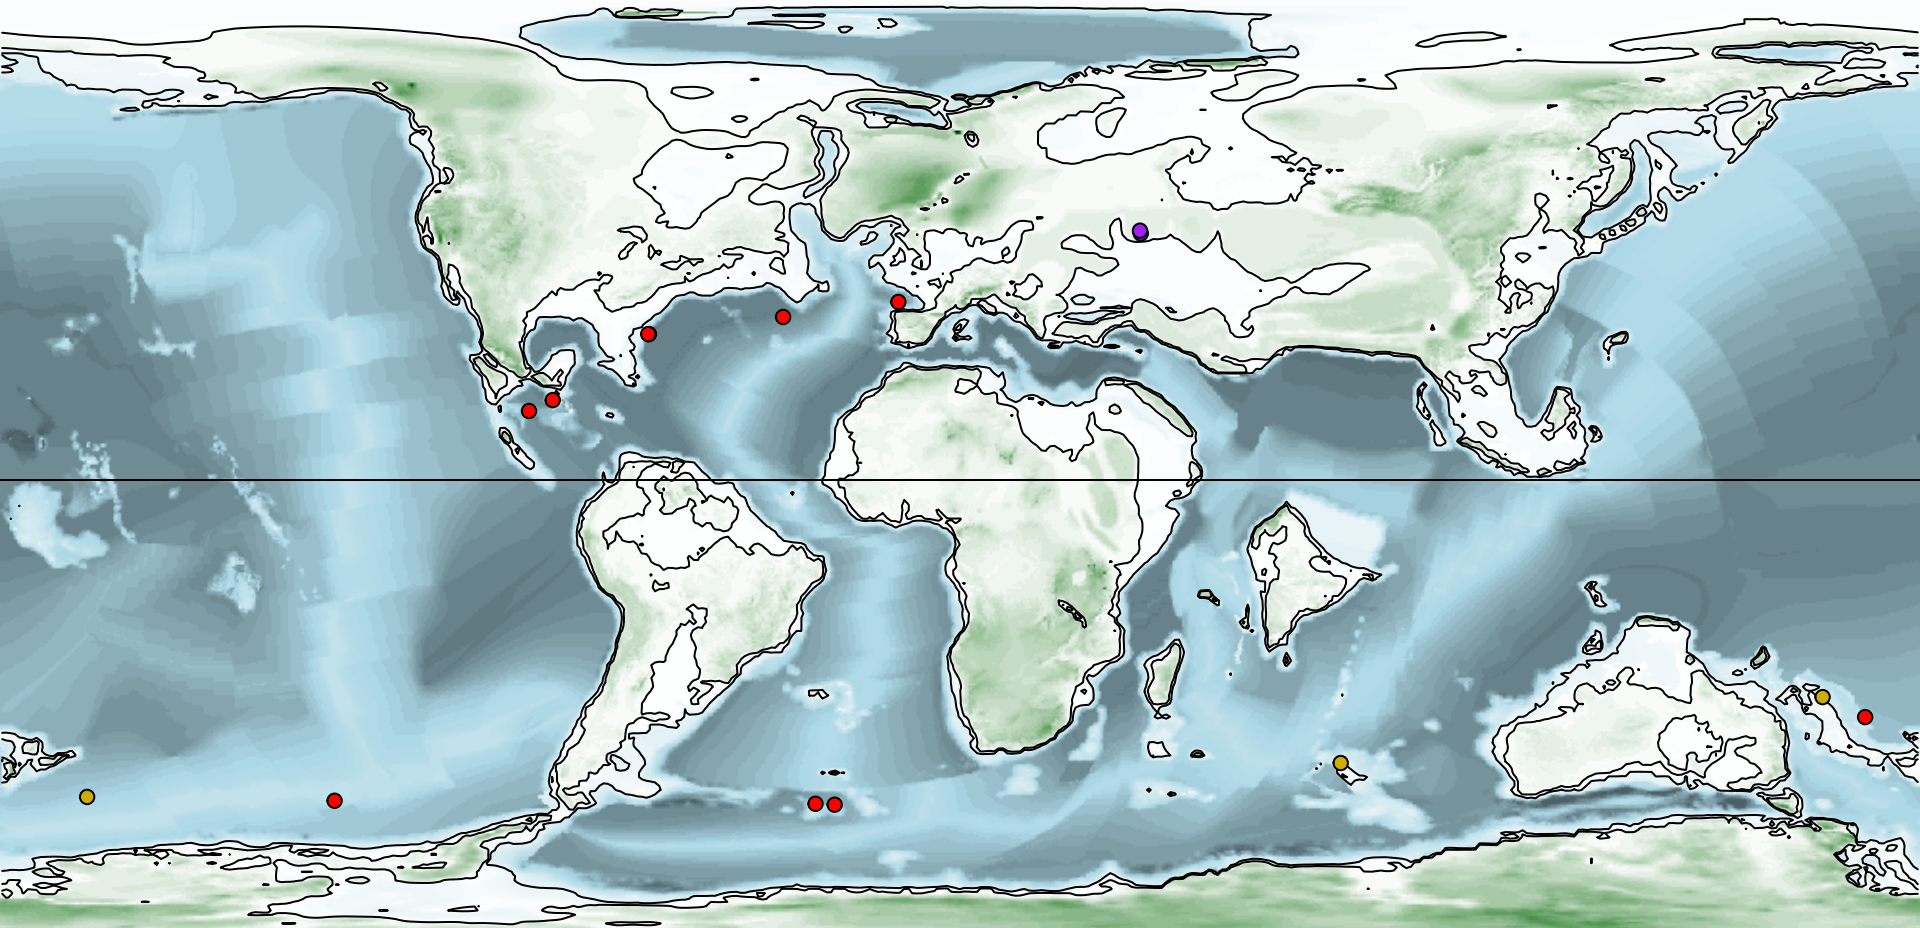

Supplement: Supplementary file 5 [file bg-22-3029-2025-supplement.zip]

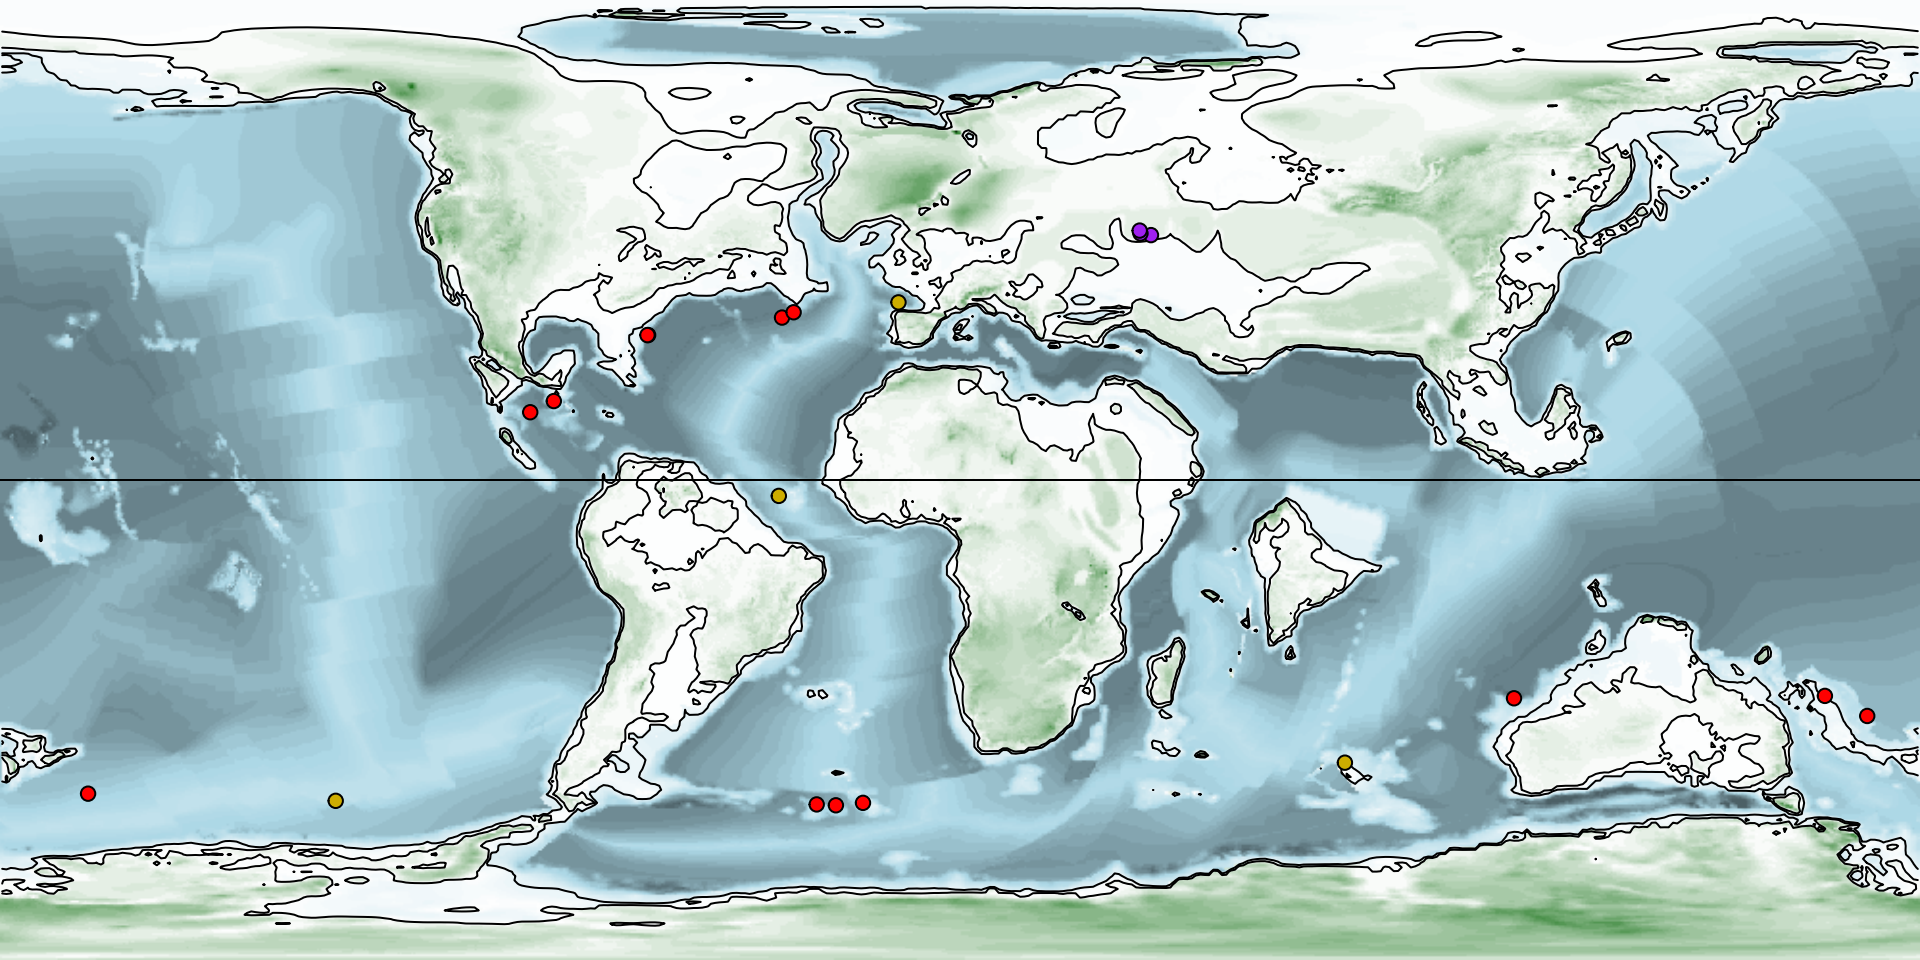

Supplement: Supplementary file 6 [file bg-22-3029-2025-supplement.zip]

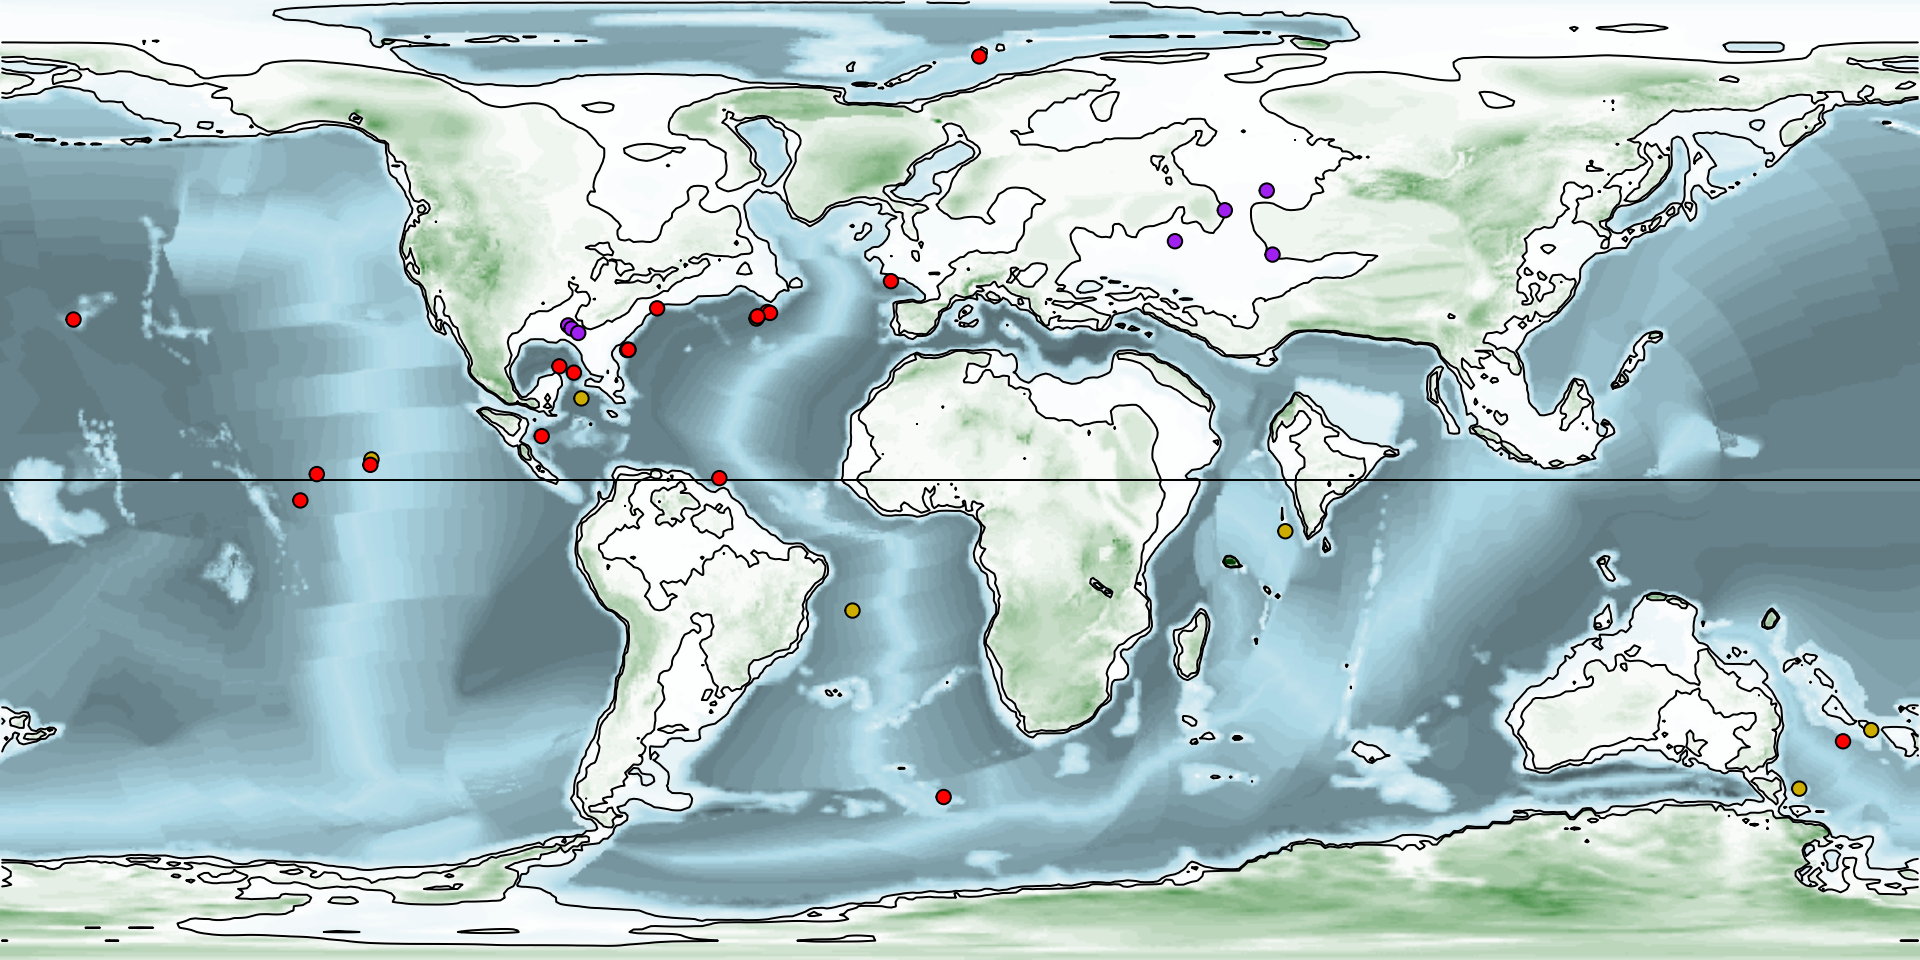

Supplement: Supplementary file 7 [file bg-22-3029-2025-supplement.zip]

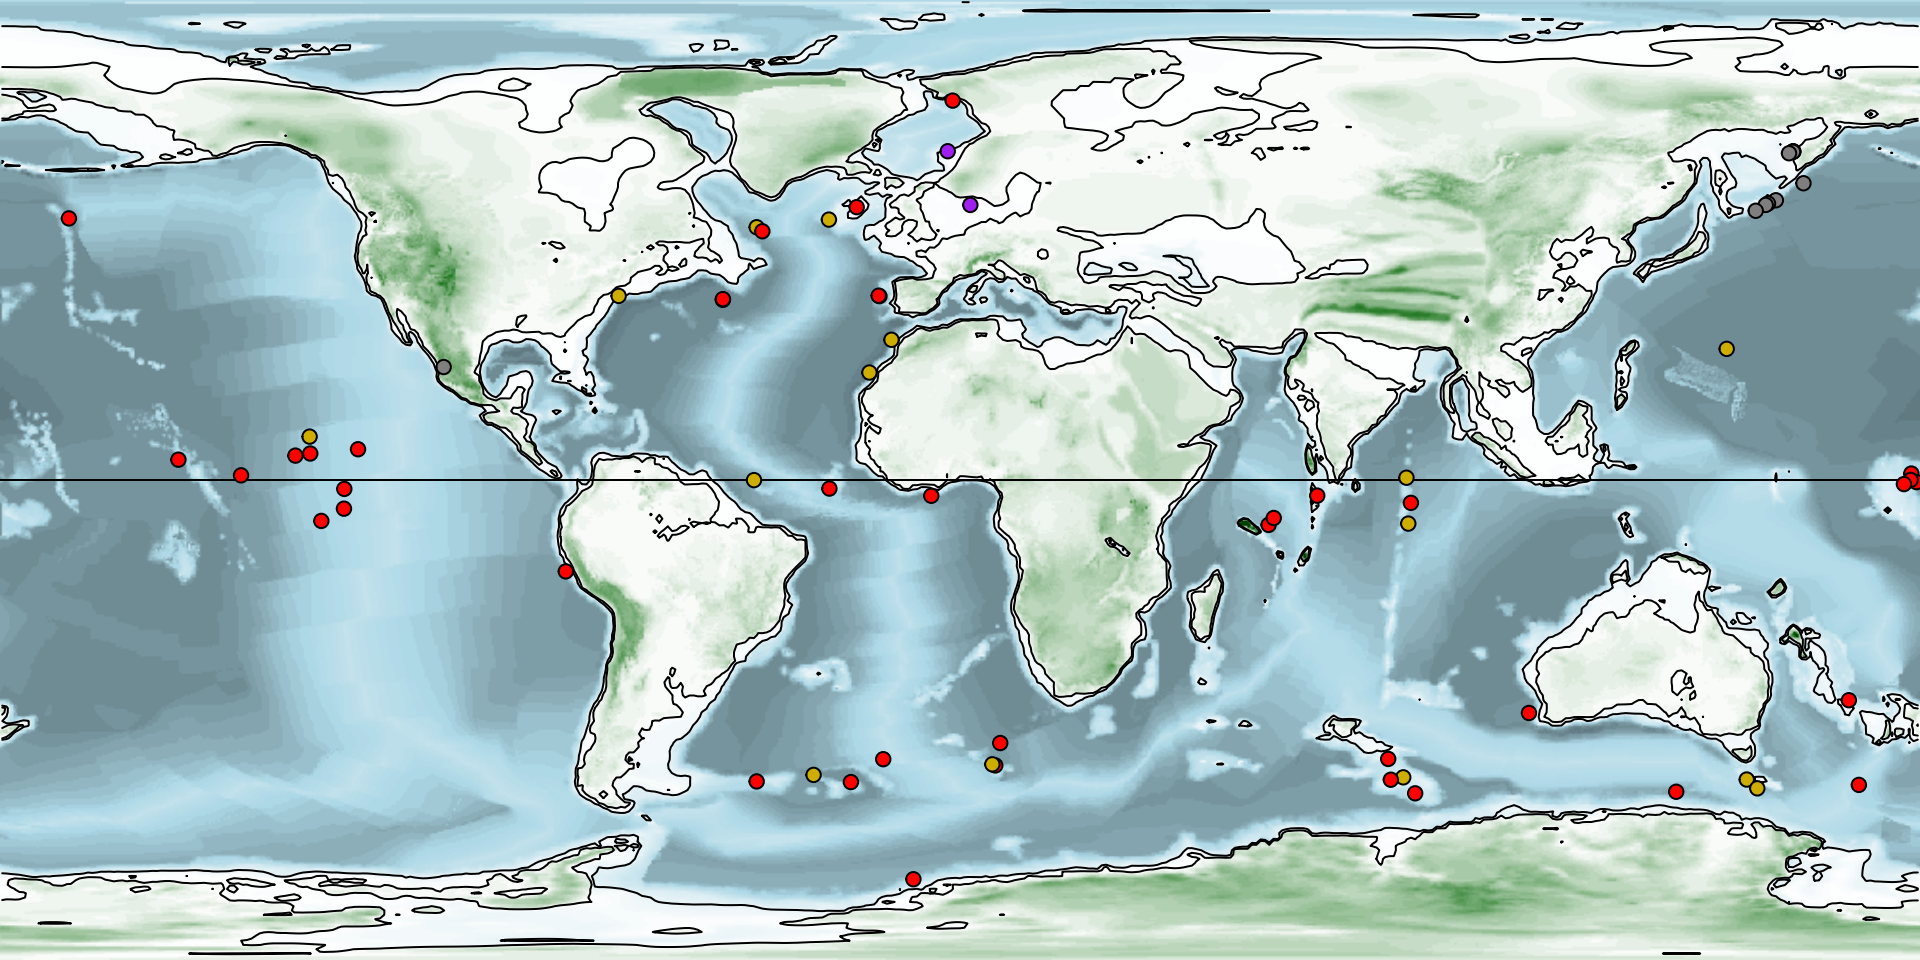

Supplement: Supplementary file 8 [file bg-22-3029-2025-supplement.zip]

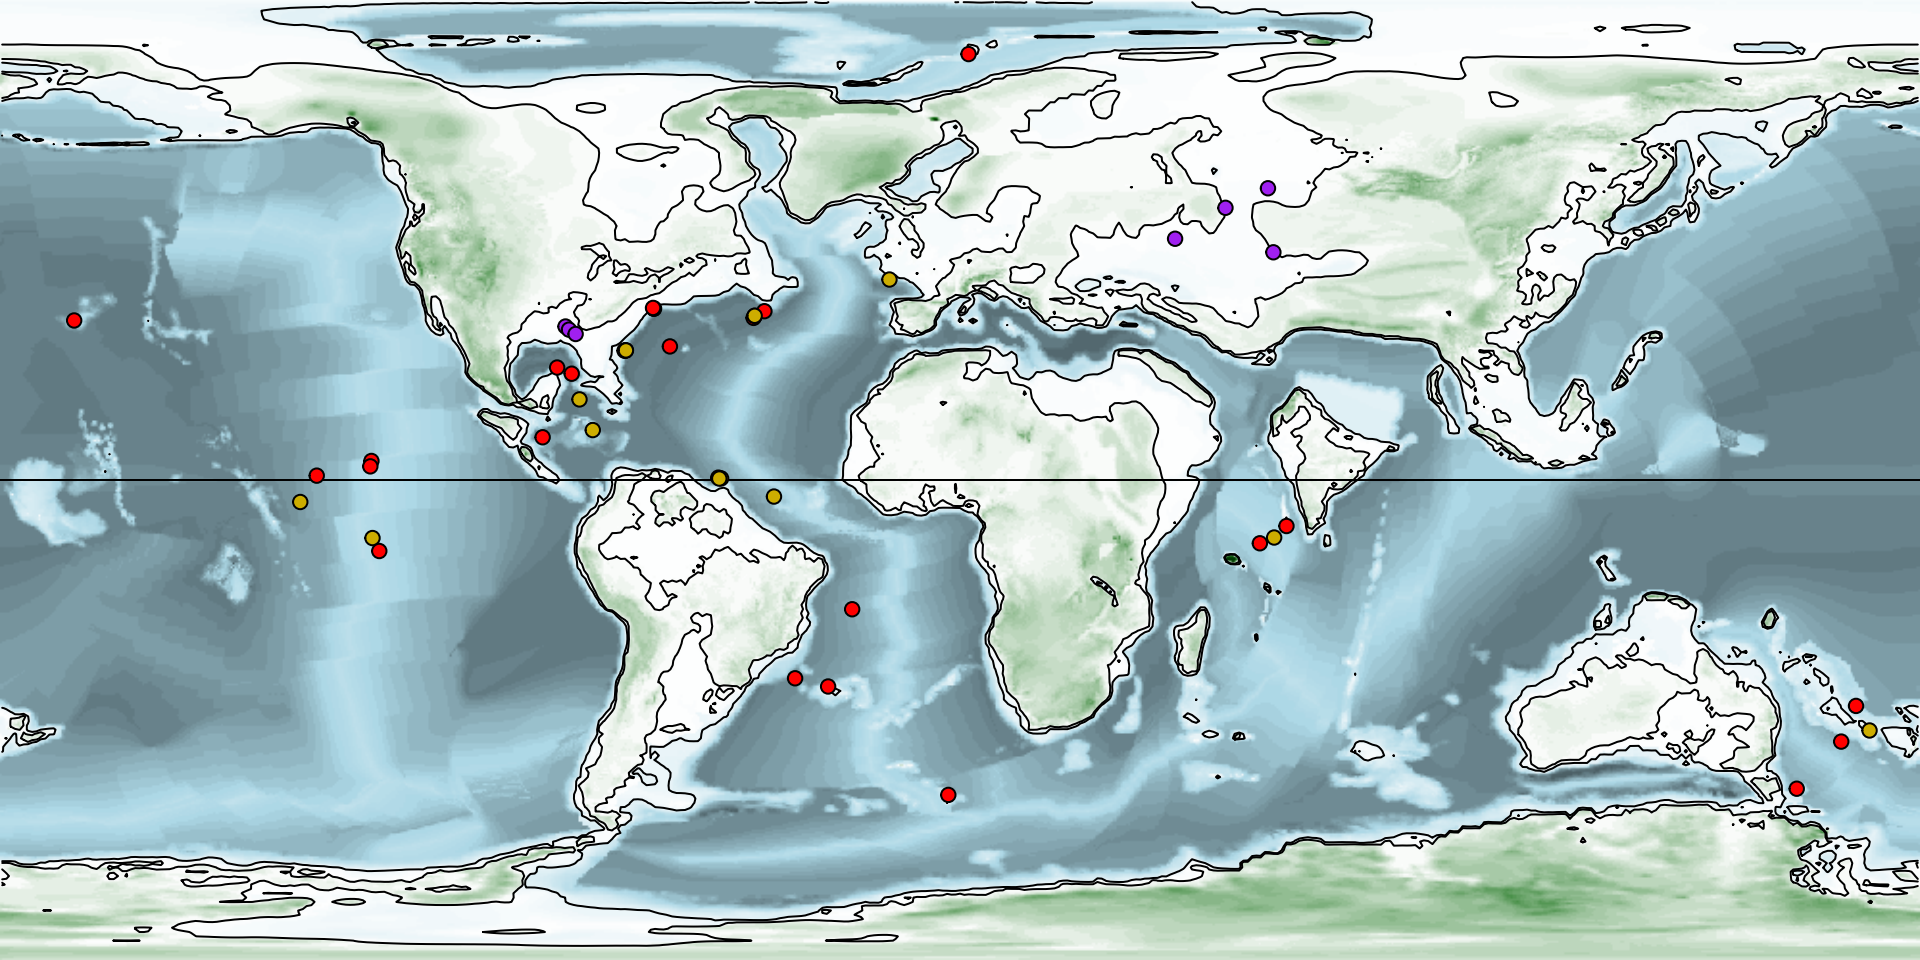

Supplement: Supplementary file 9 [file bg-22-3029-2025-supplement.zip]

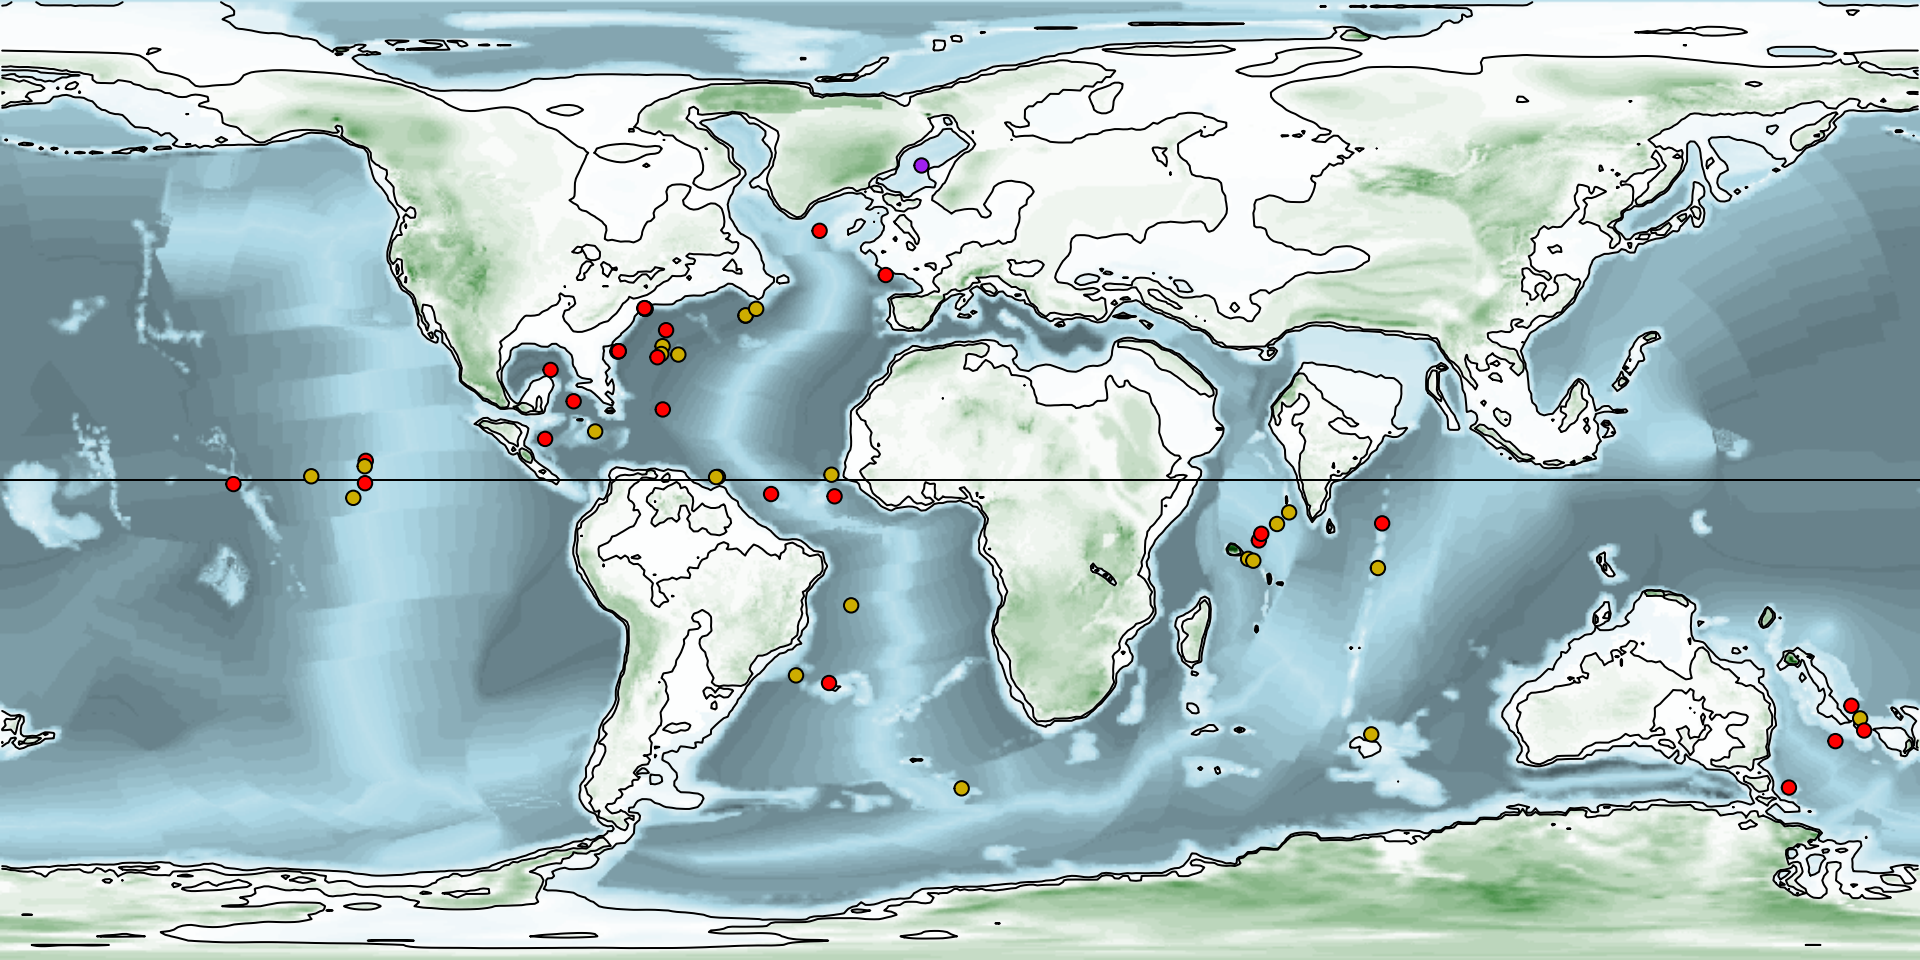

Supplement: Supplementary file 10 [file bg-22-3029-2025-supplement.zip]

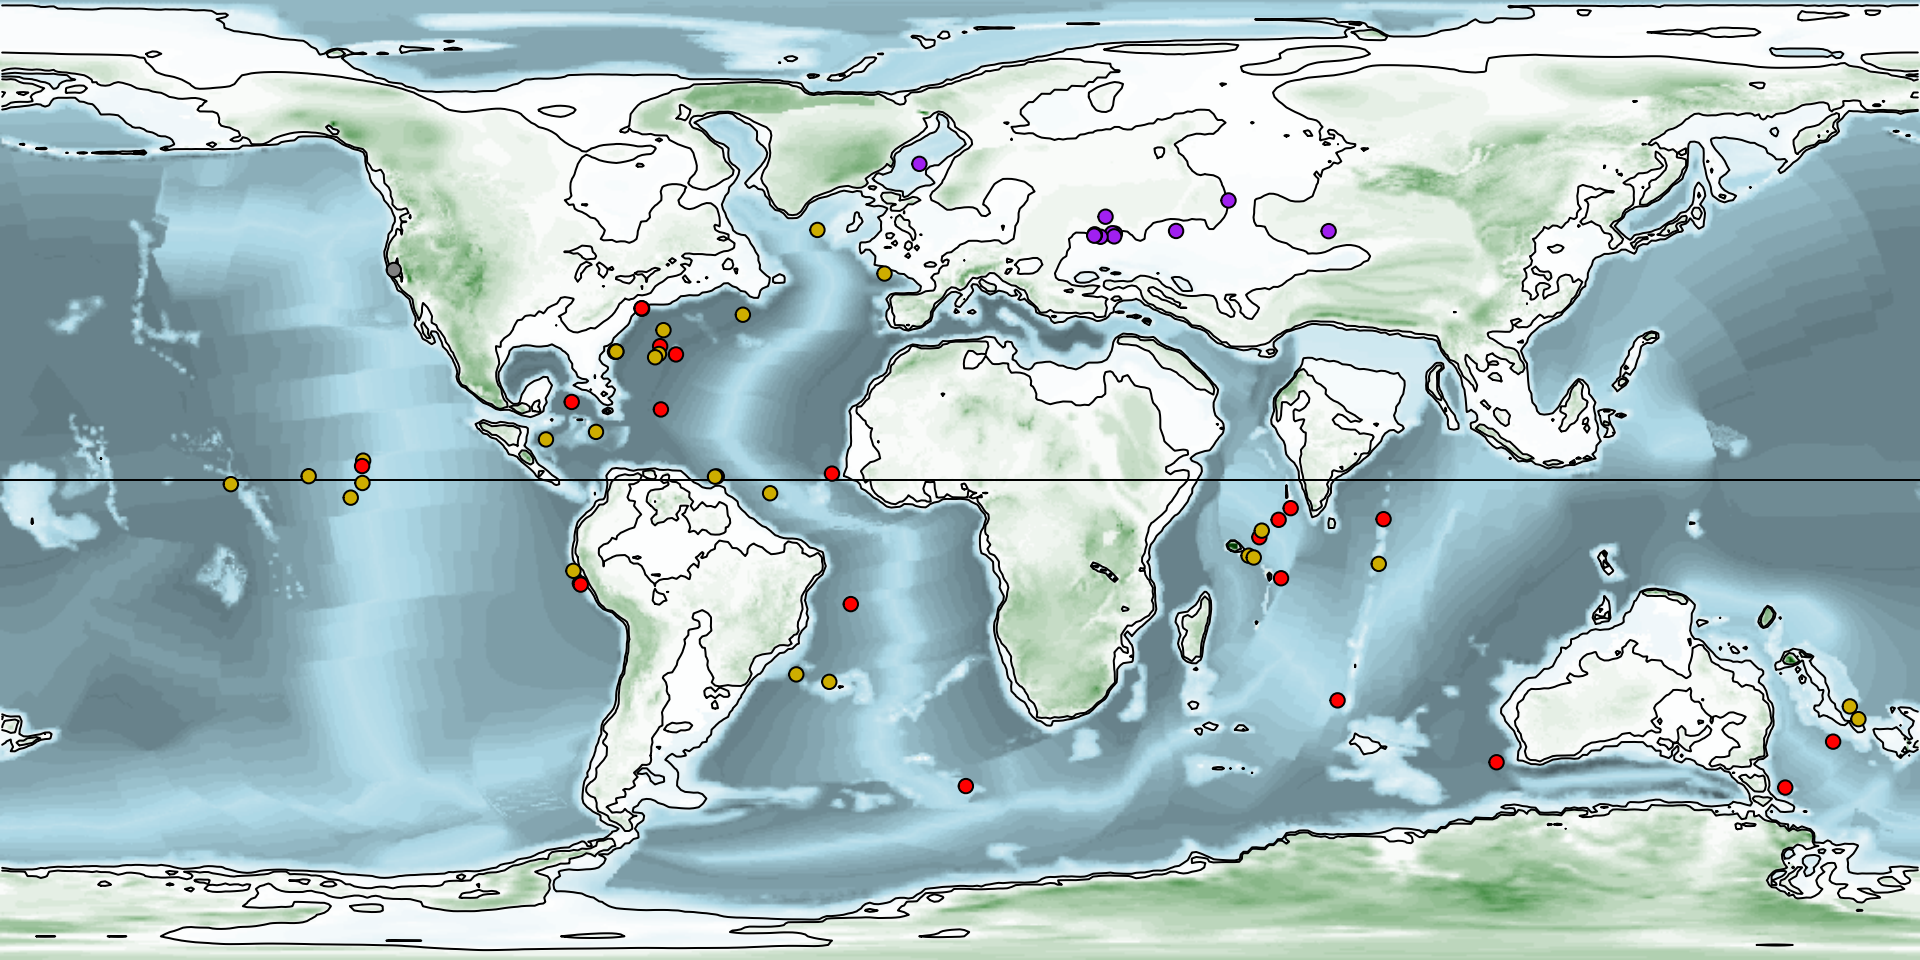

Supplement: Supplementary file 11 [file bg-22-3029-2025-supplement.zip]

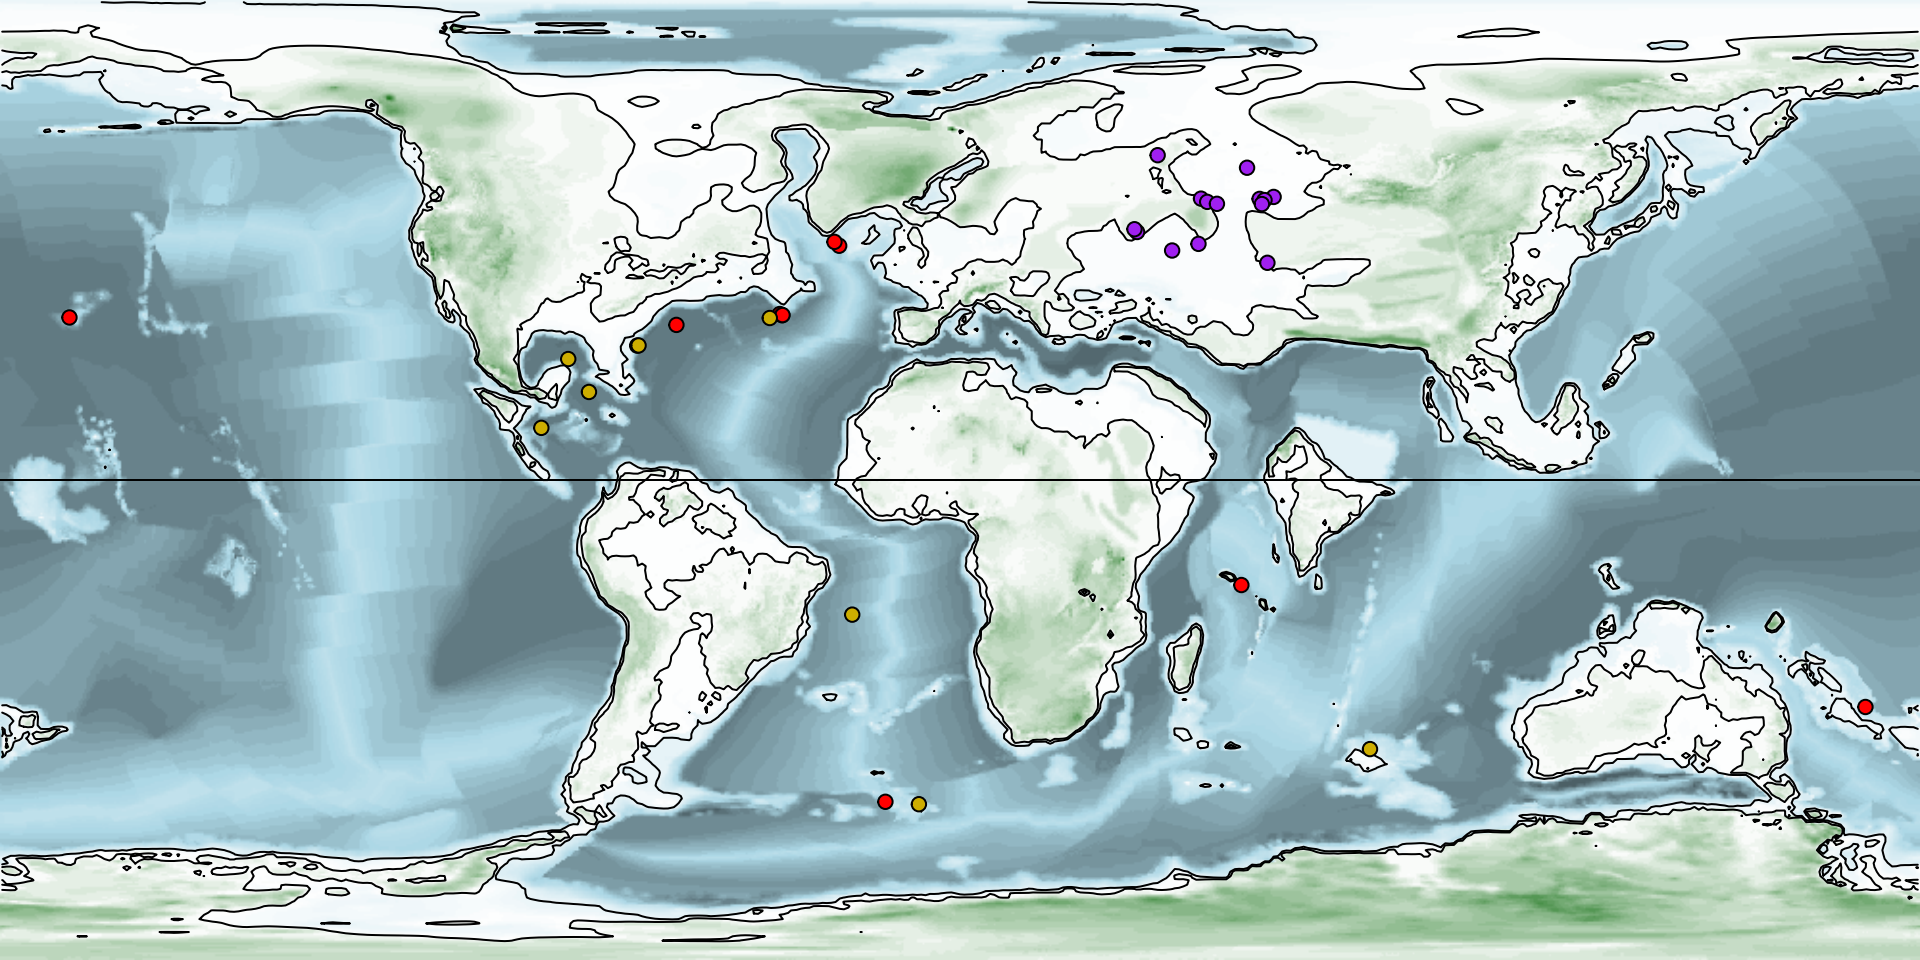

Supplement: Supplementary file 12 [file bg-22-3029-2025-supplement.zip]

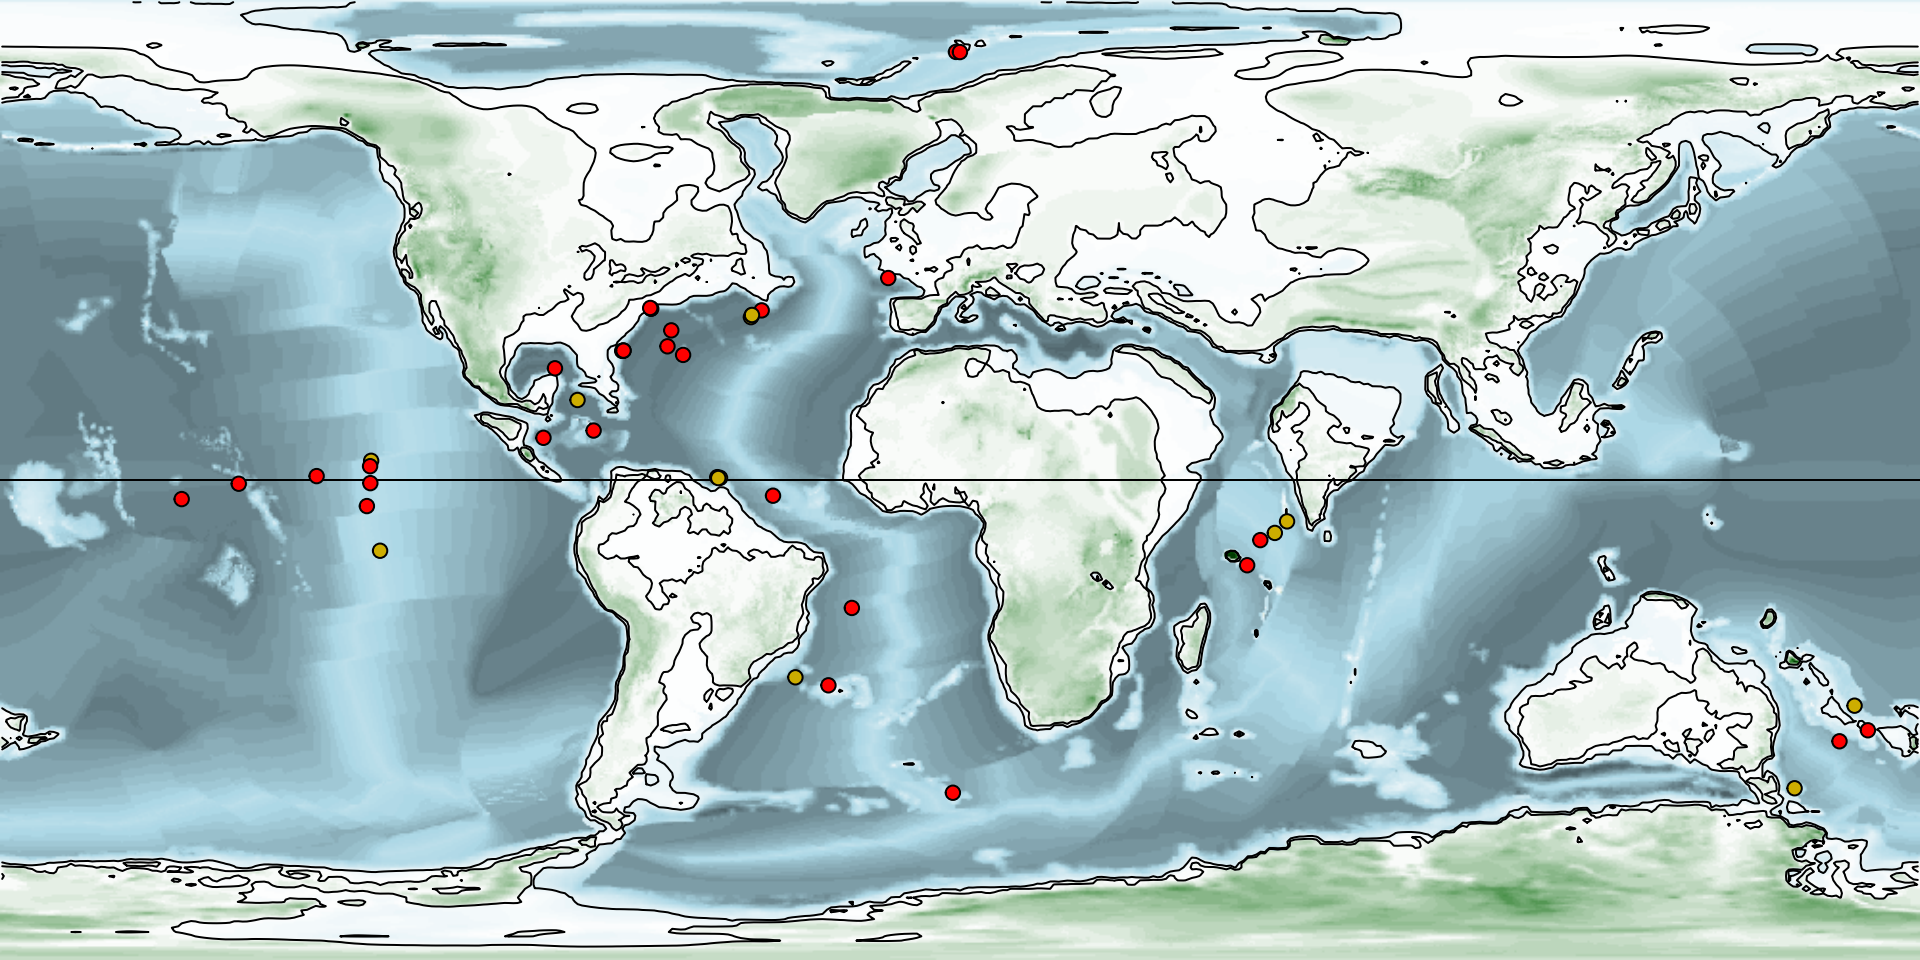

Supplement: Supplementary file 13 [file bg-22-3029-2025-supplement.zip]

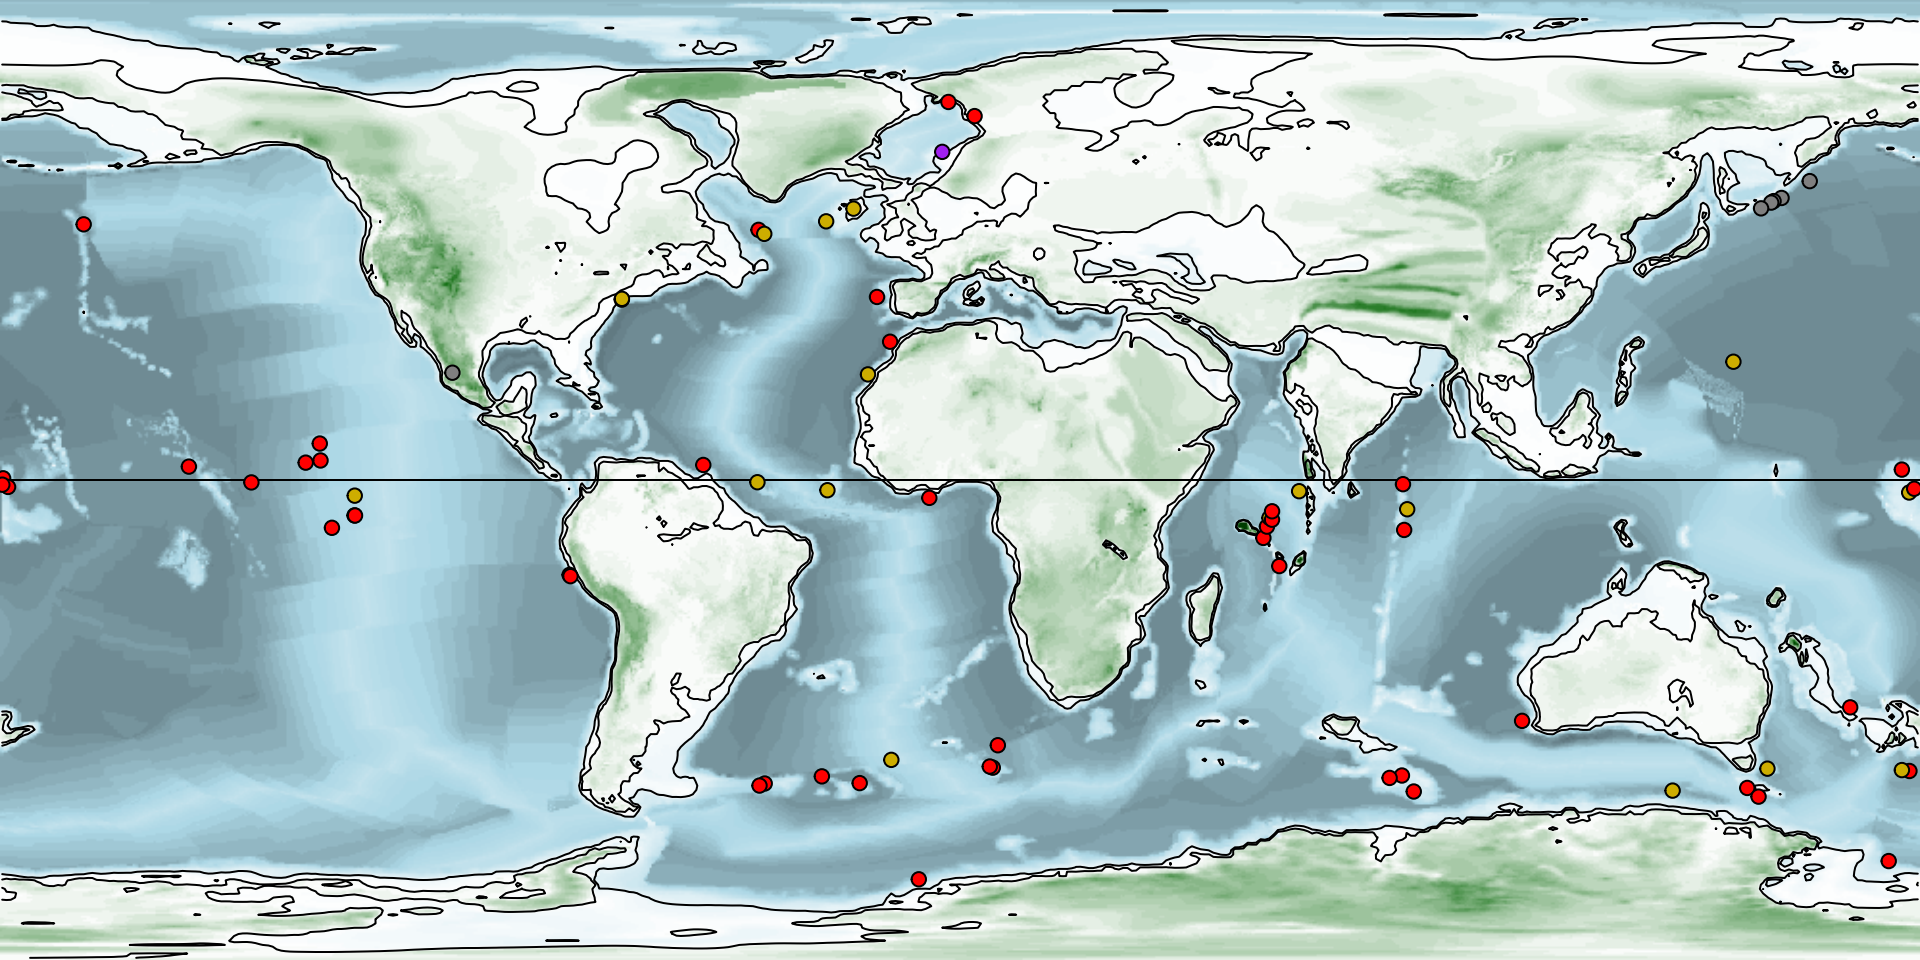

Supplement: Supplementary file 14 [file bg-22-3029-2025-supplement.zip]

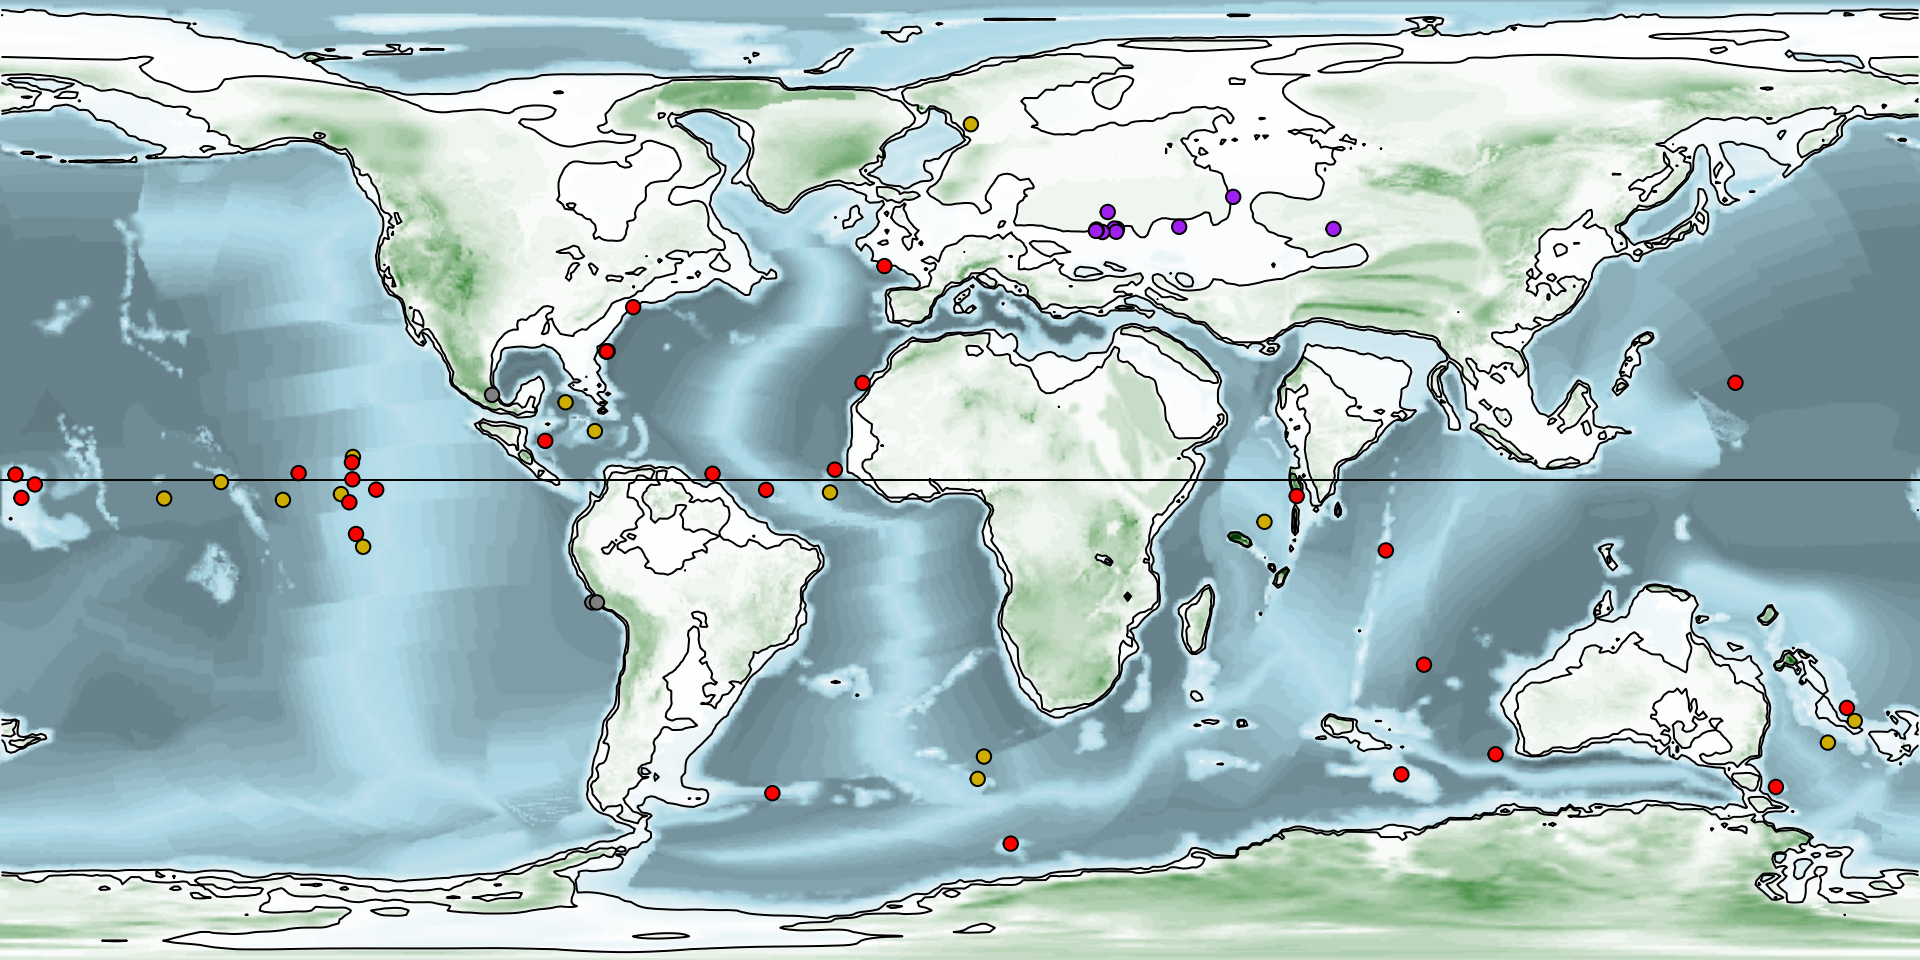

Supplement: Supplementary file 15 [file bg-22-3029-2025-supplement.zip]

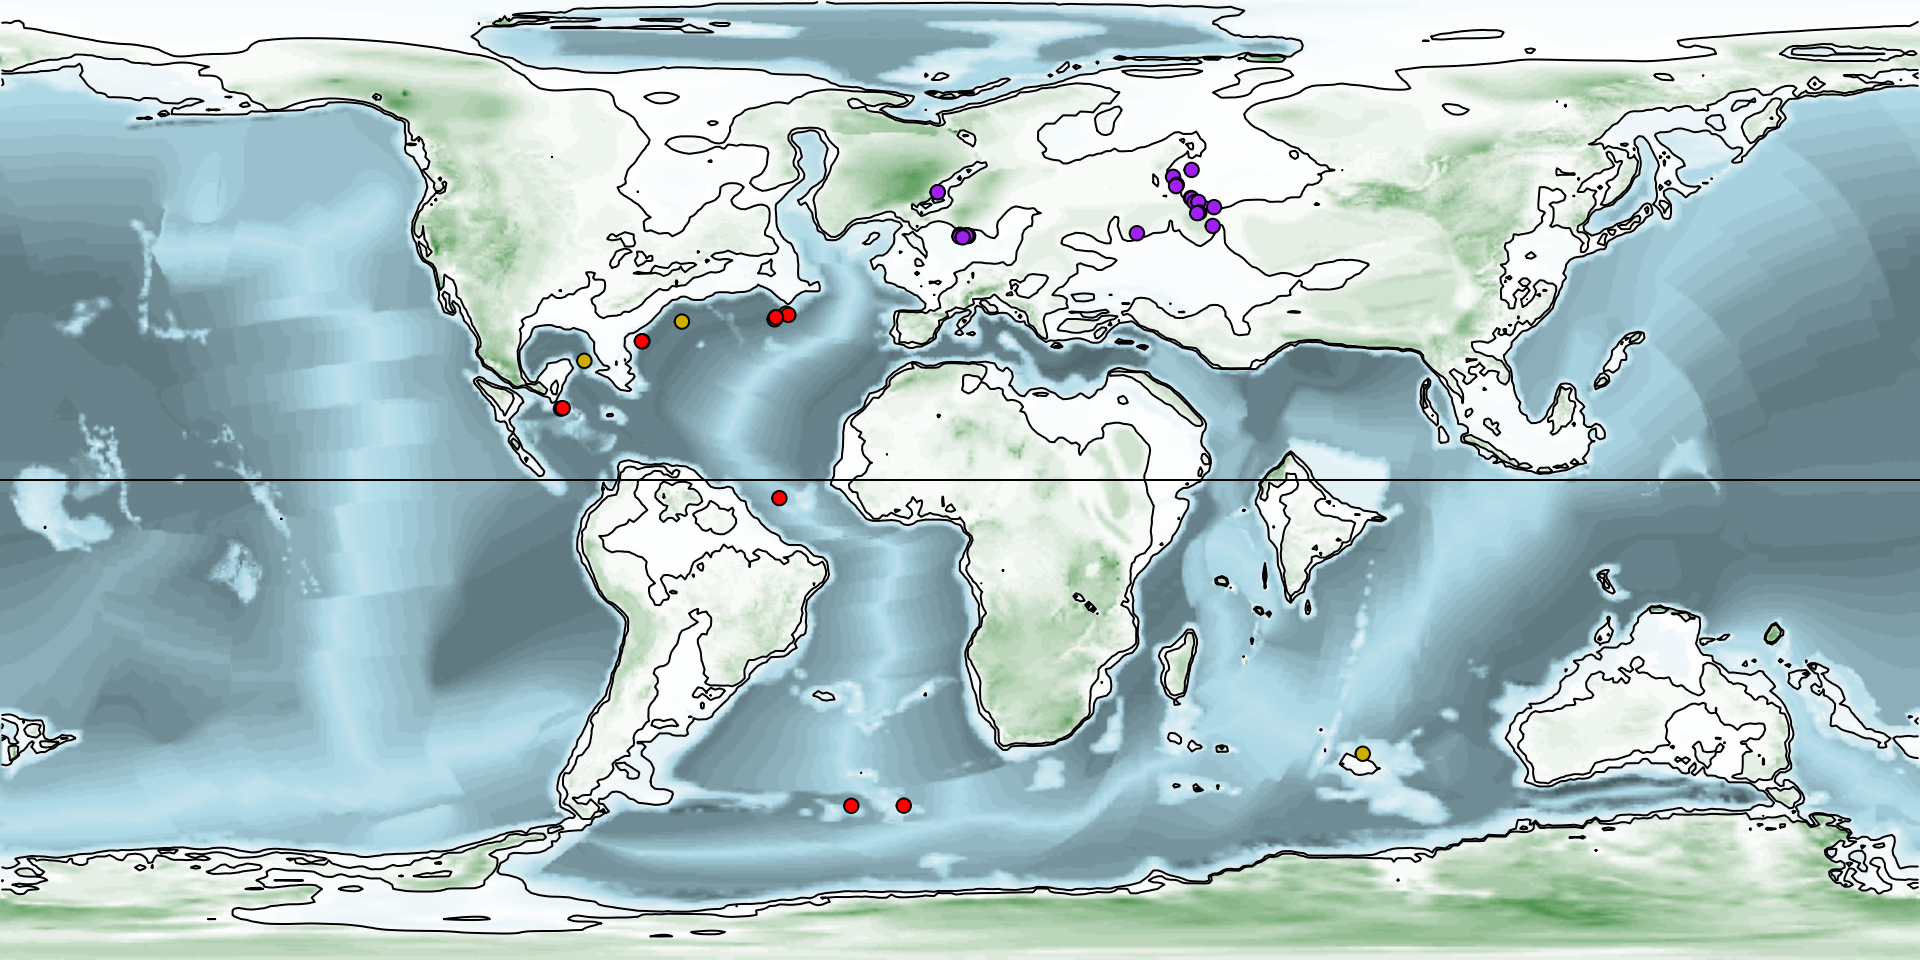

Supplement: Supplementary file 16 [file bg-22-3029-2025-supplement.zip]

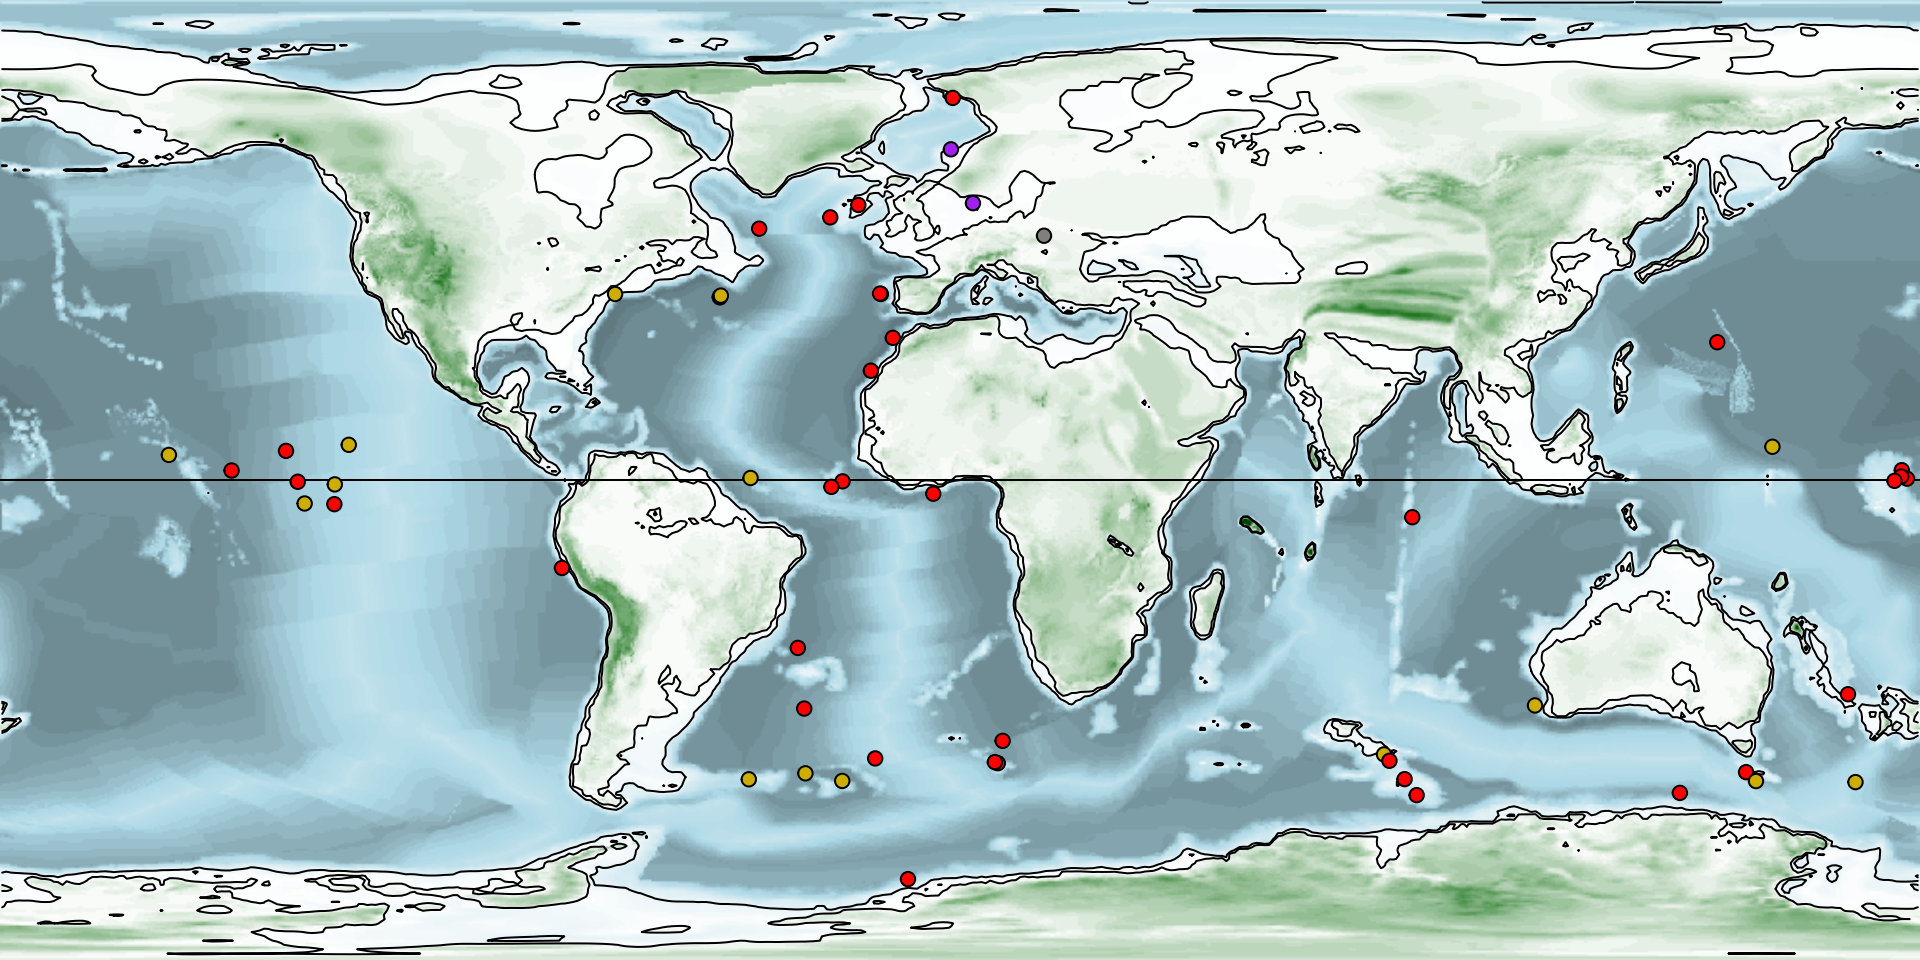

Supplement: Supplementary file 17 [file bg-22-3029-2025-supplement.zip]

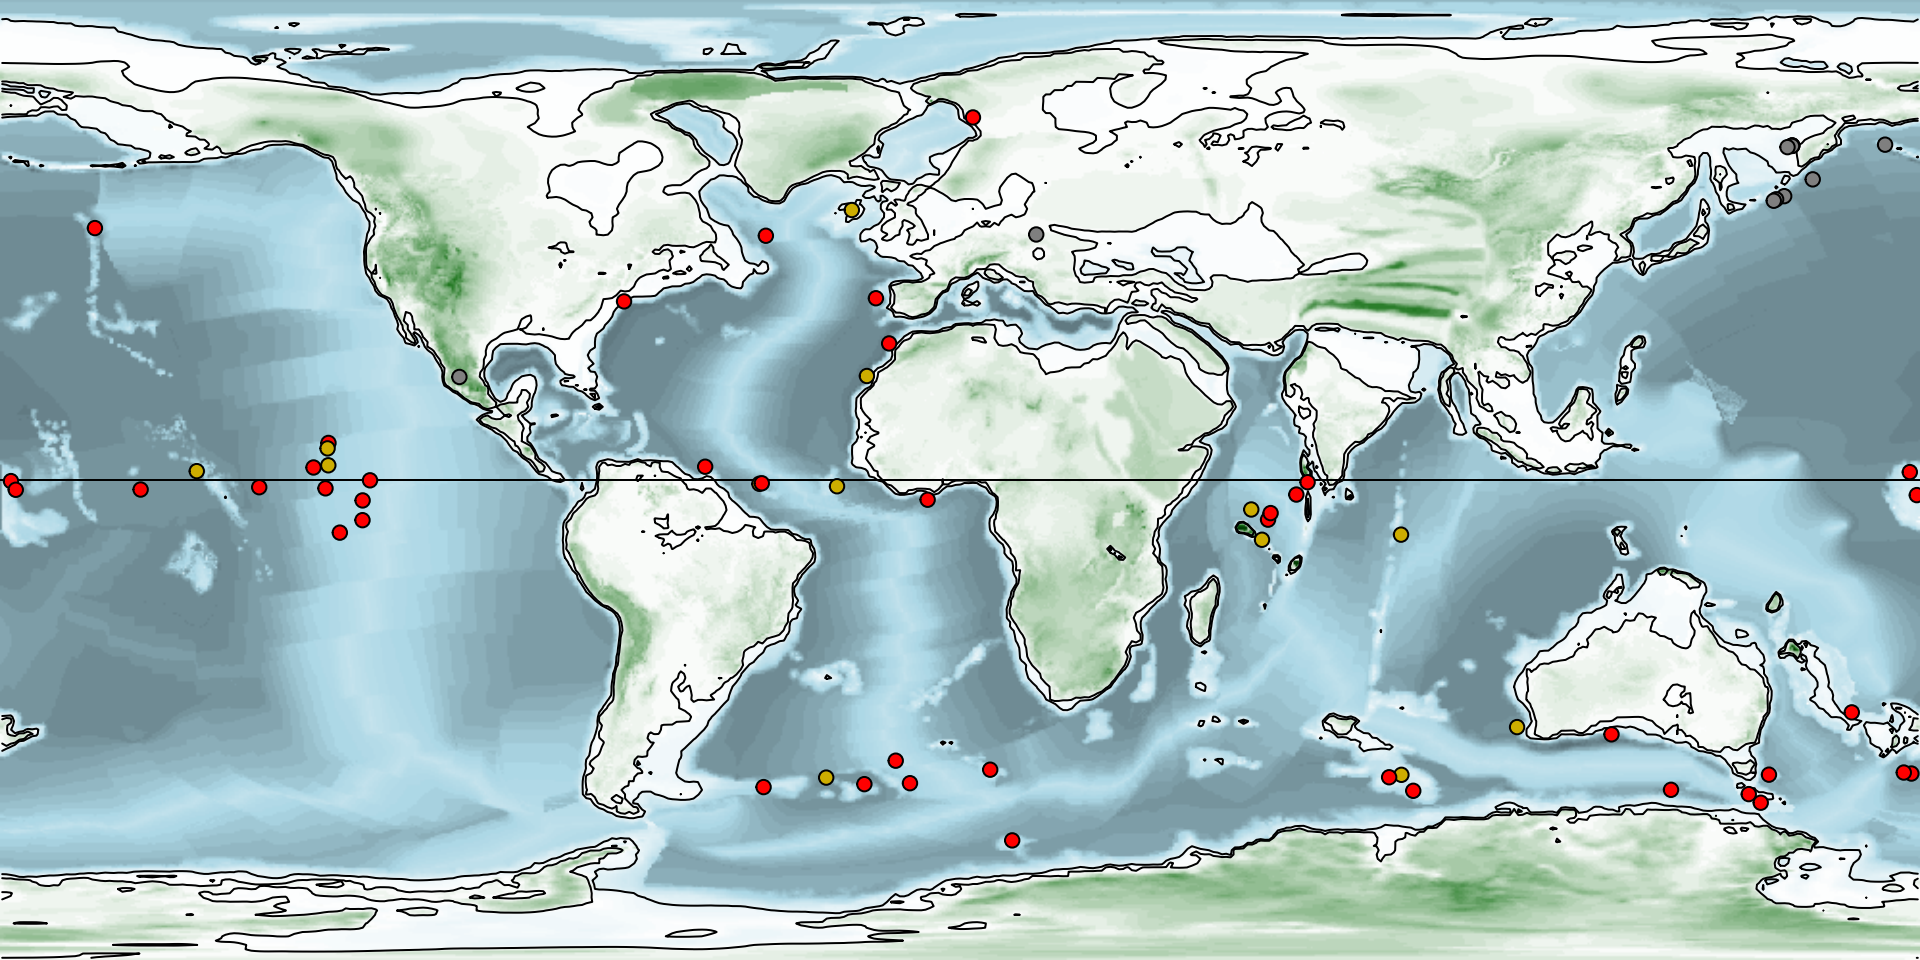

Supplement: Supplementary file 18 [file bg-22-3029-2025-supplement.zip]

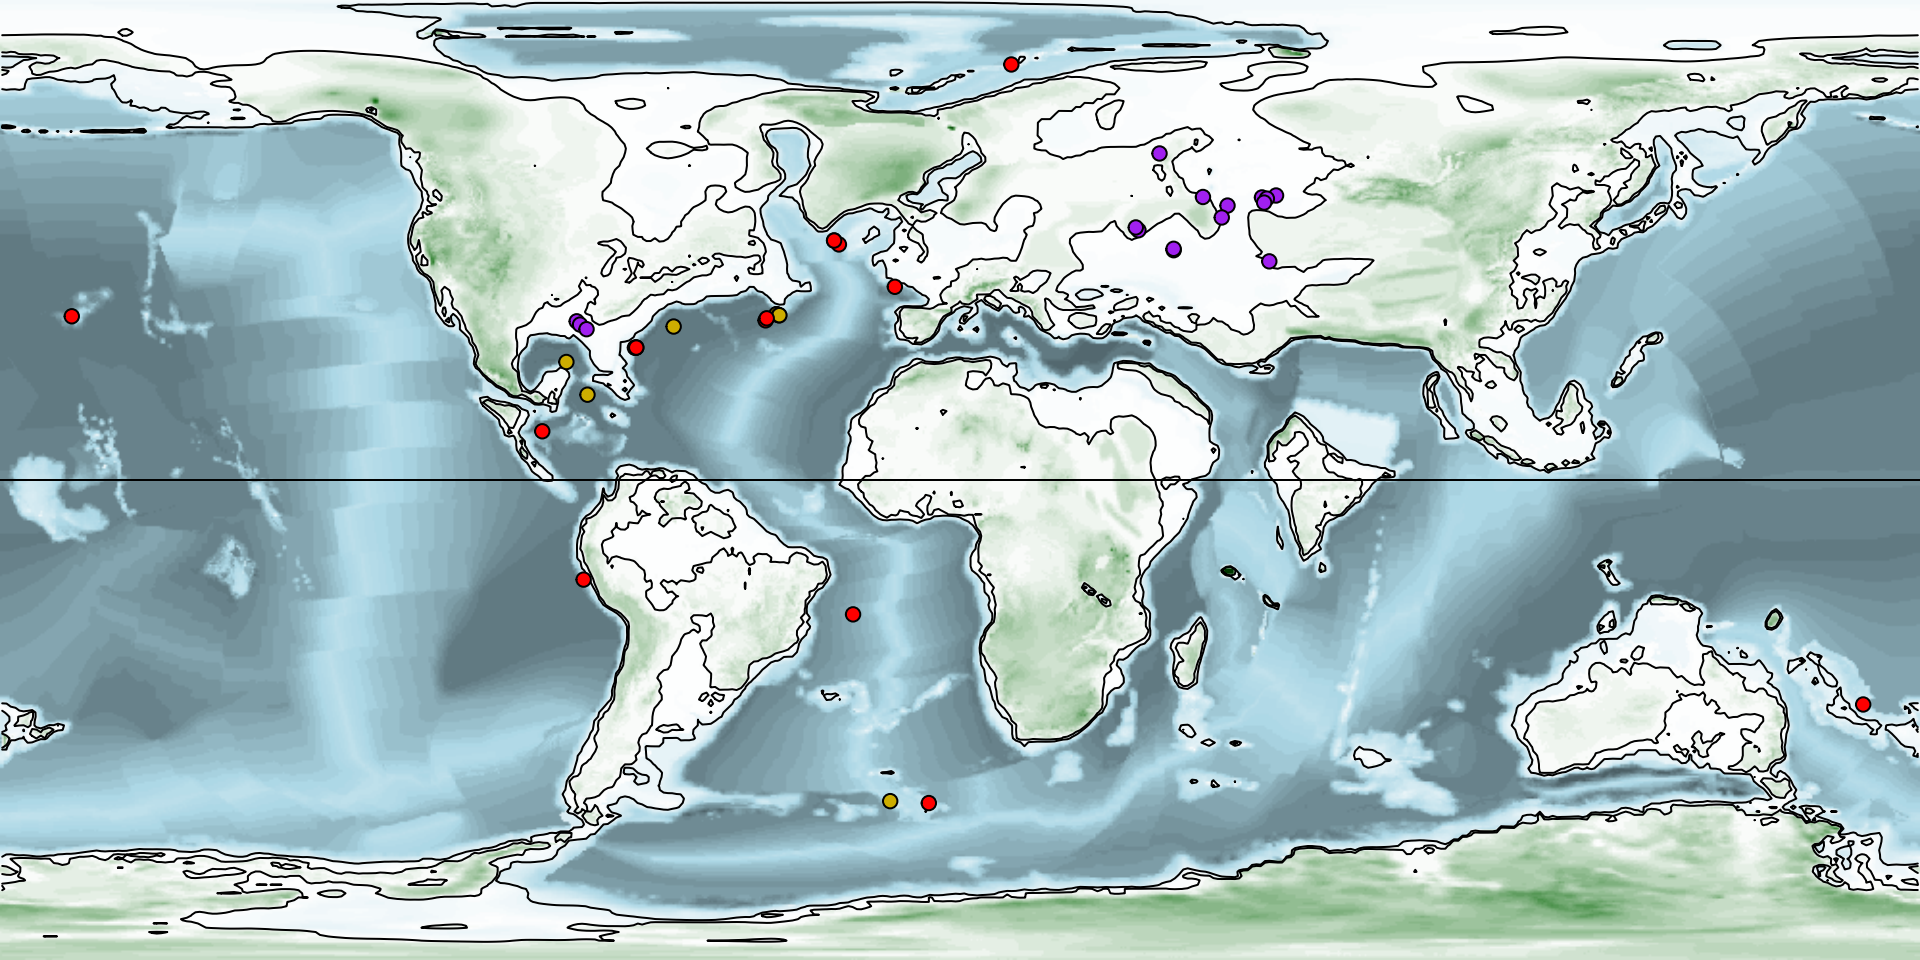

Supplement: Supplementary file 19 [file bg-22-3029-2025-supplement.zip]

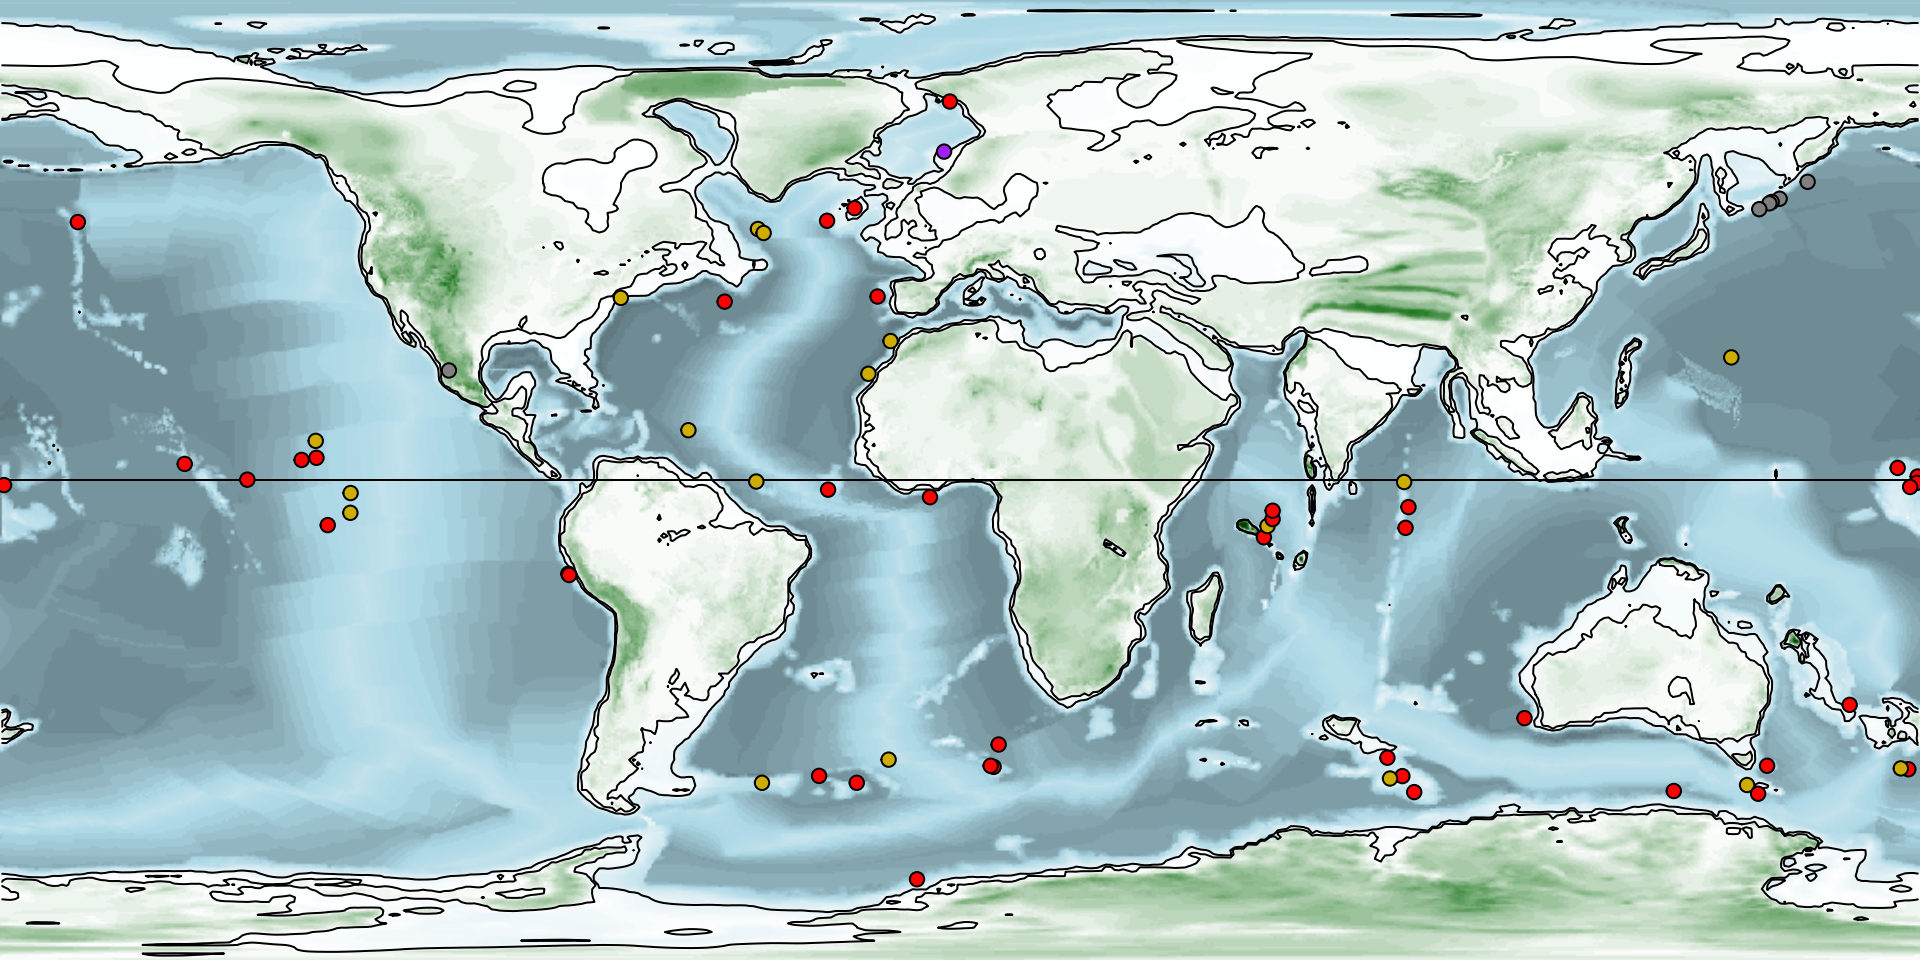

Supplement: Supplementary file 20 [file bg-22-3029-2025-supplement.zip]

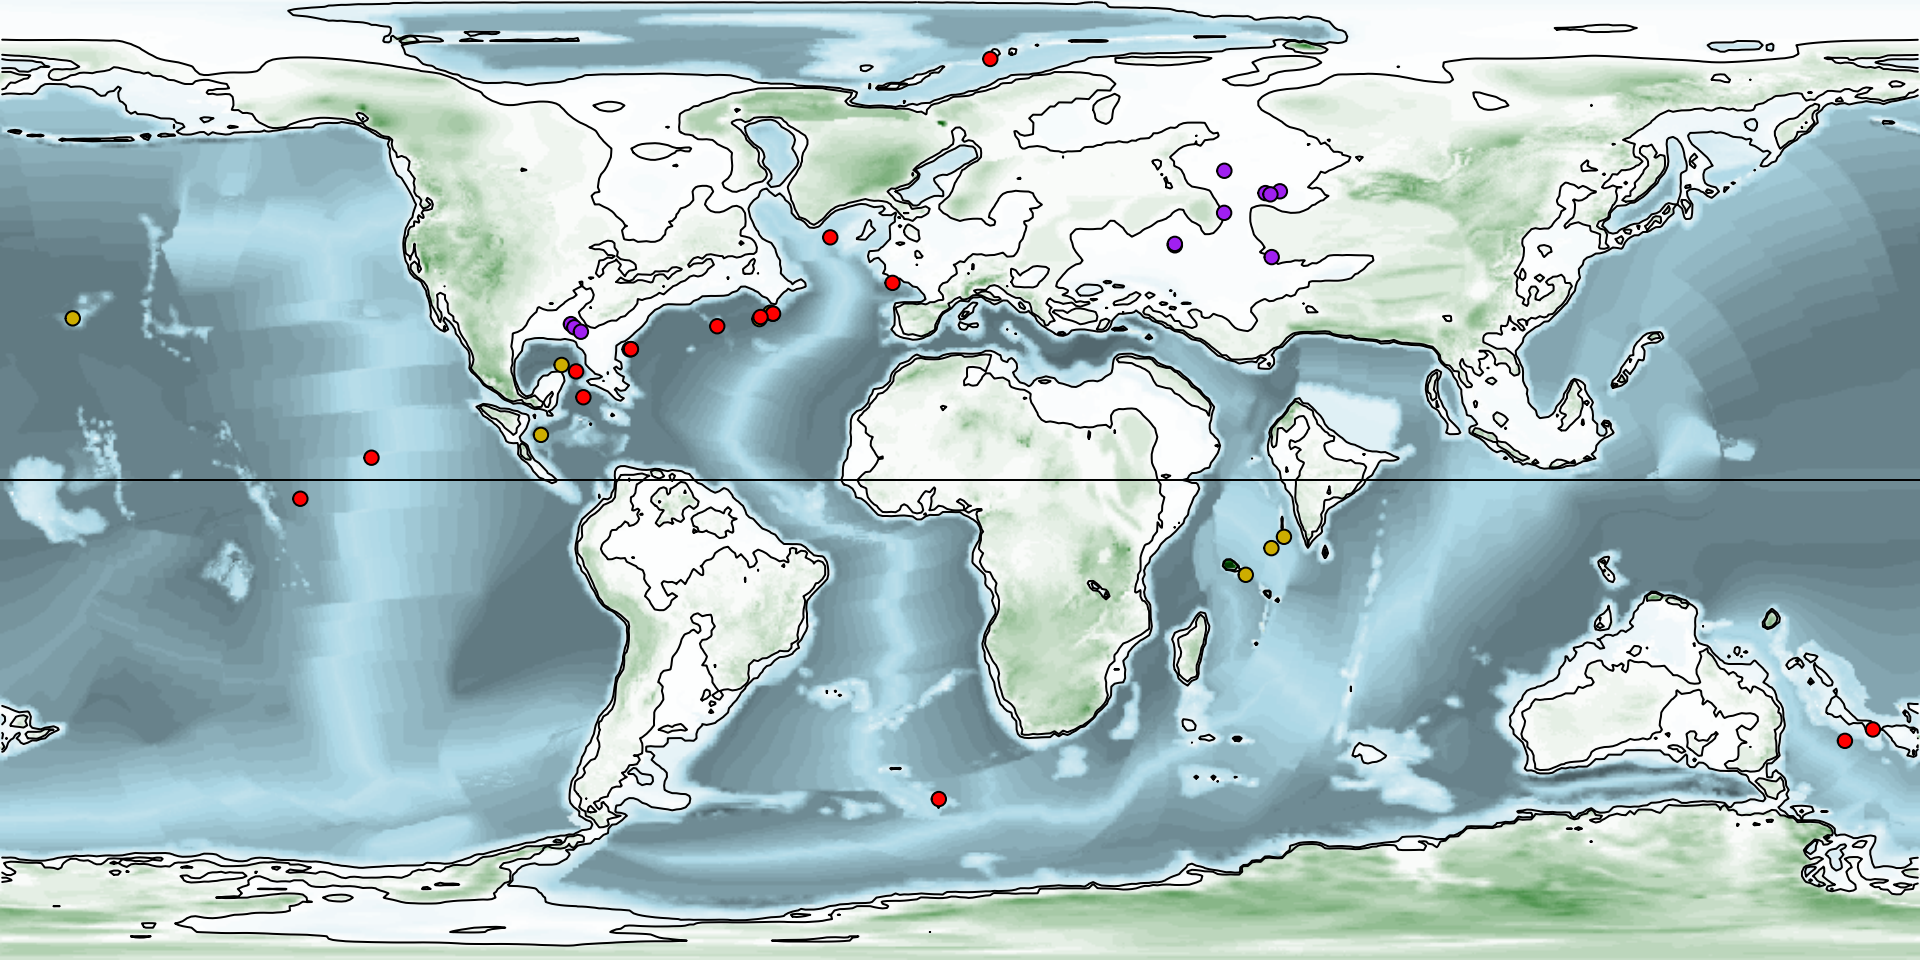

Supplement: Supplementary file 21 [file bg-22-3029-2025-supplement.zip]

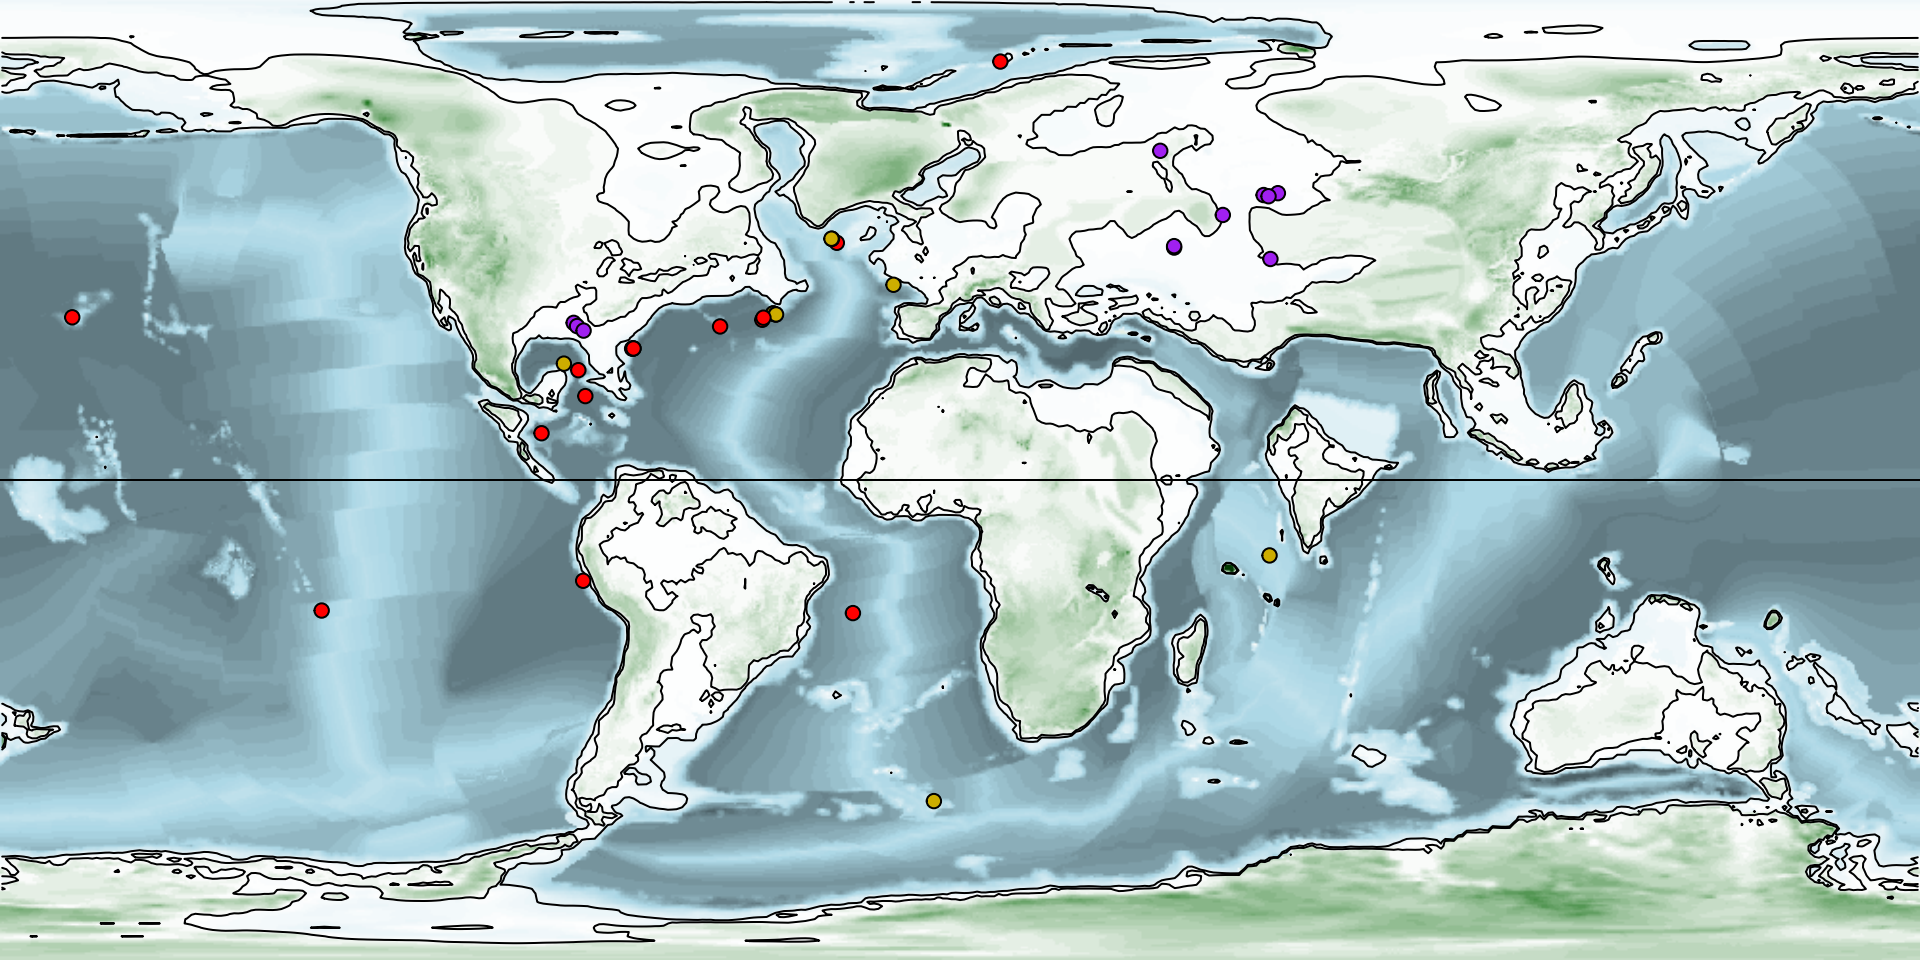

Supplement: Supplementary file 22 [file bg-22-3029-2025-supplement.zip]

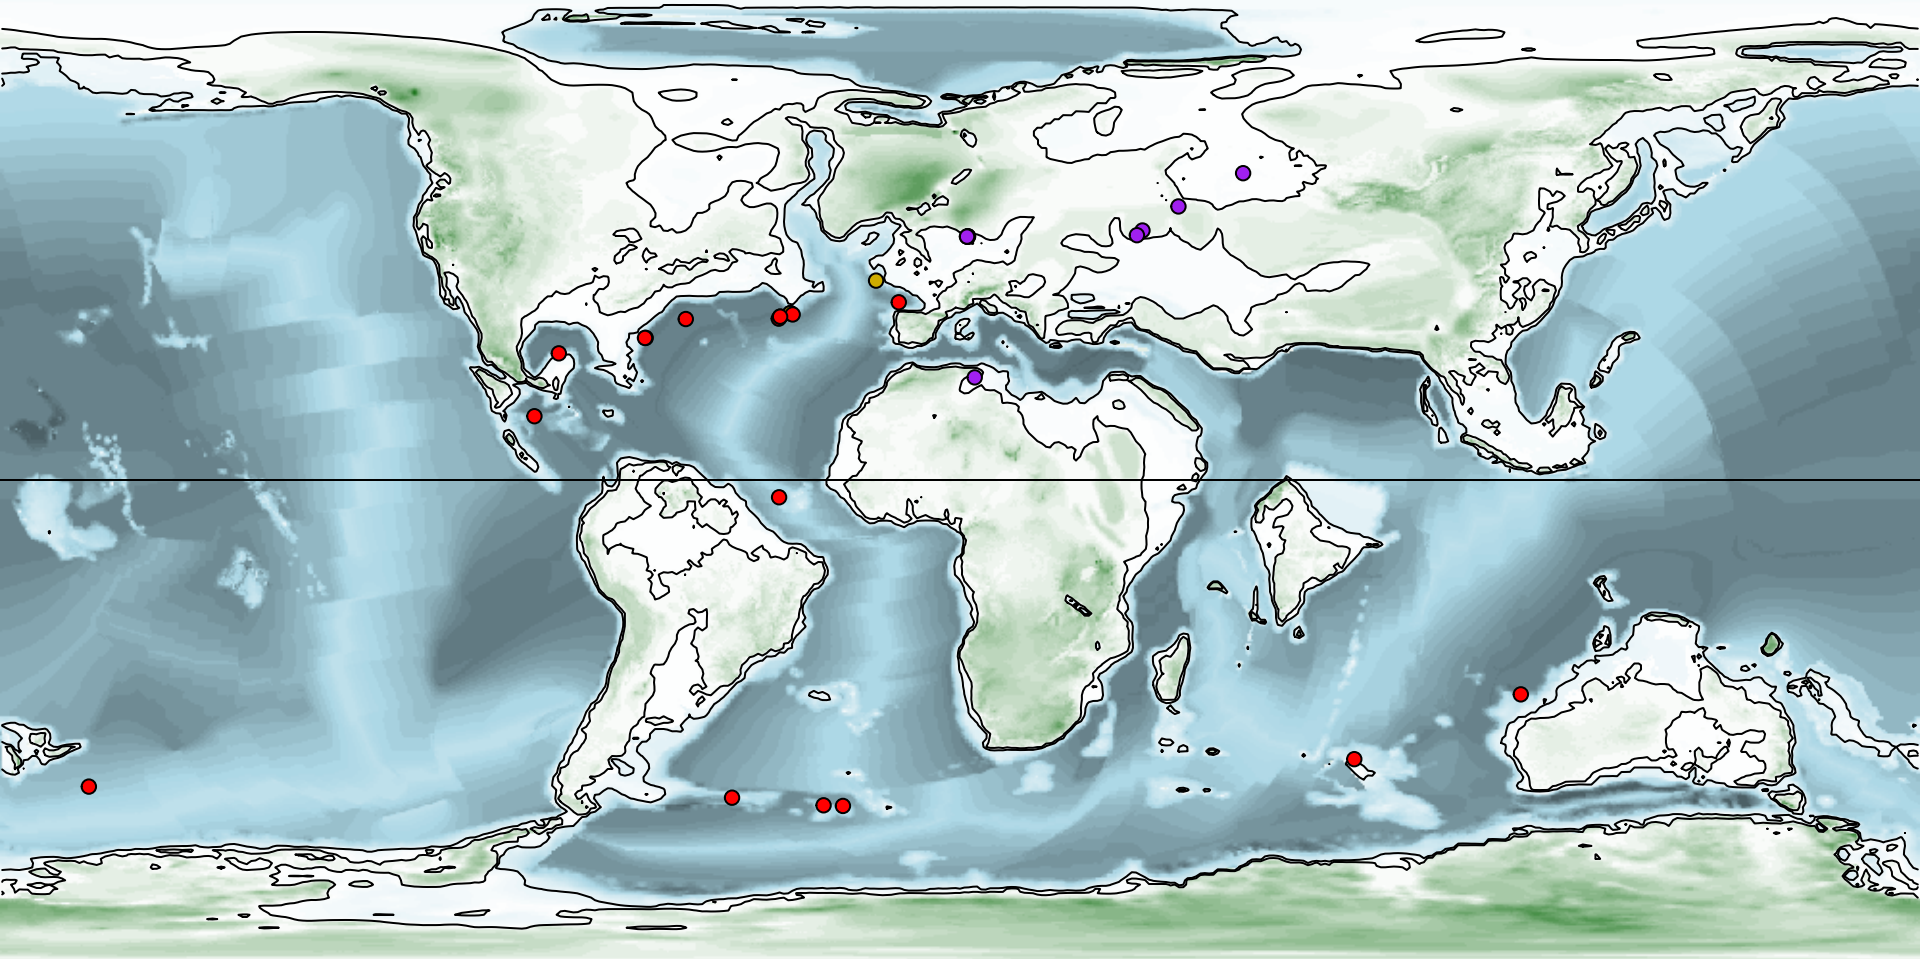

Supplement: Supplementary file 23 [file bg-22-3029-2025-supplement.zip]

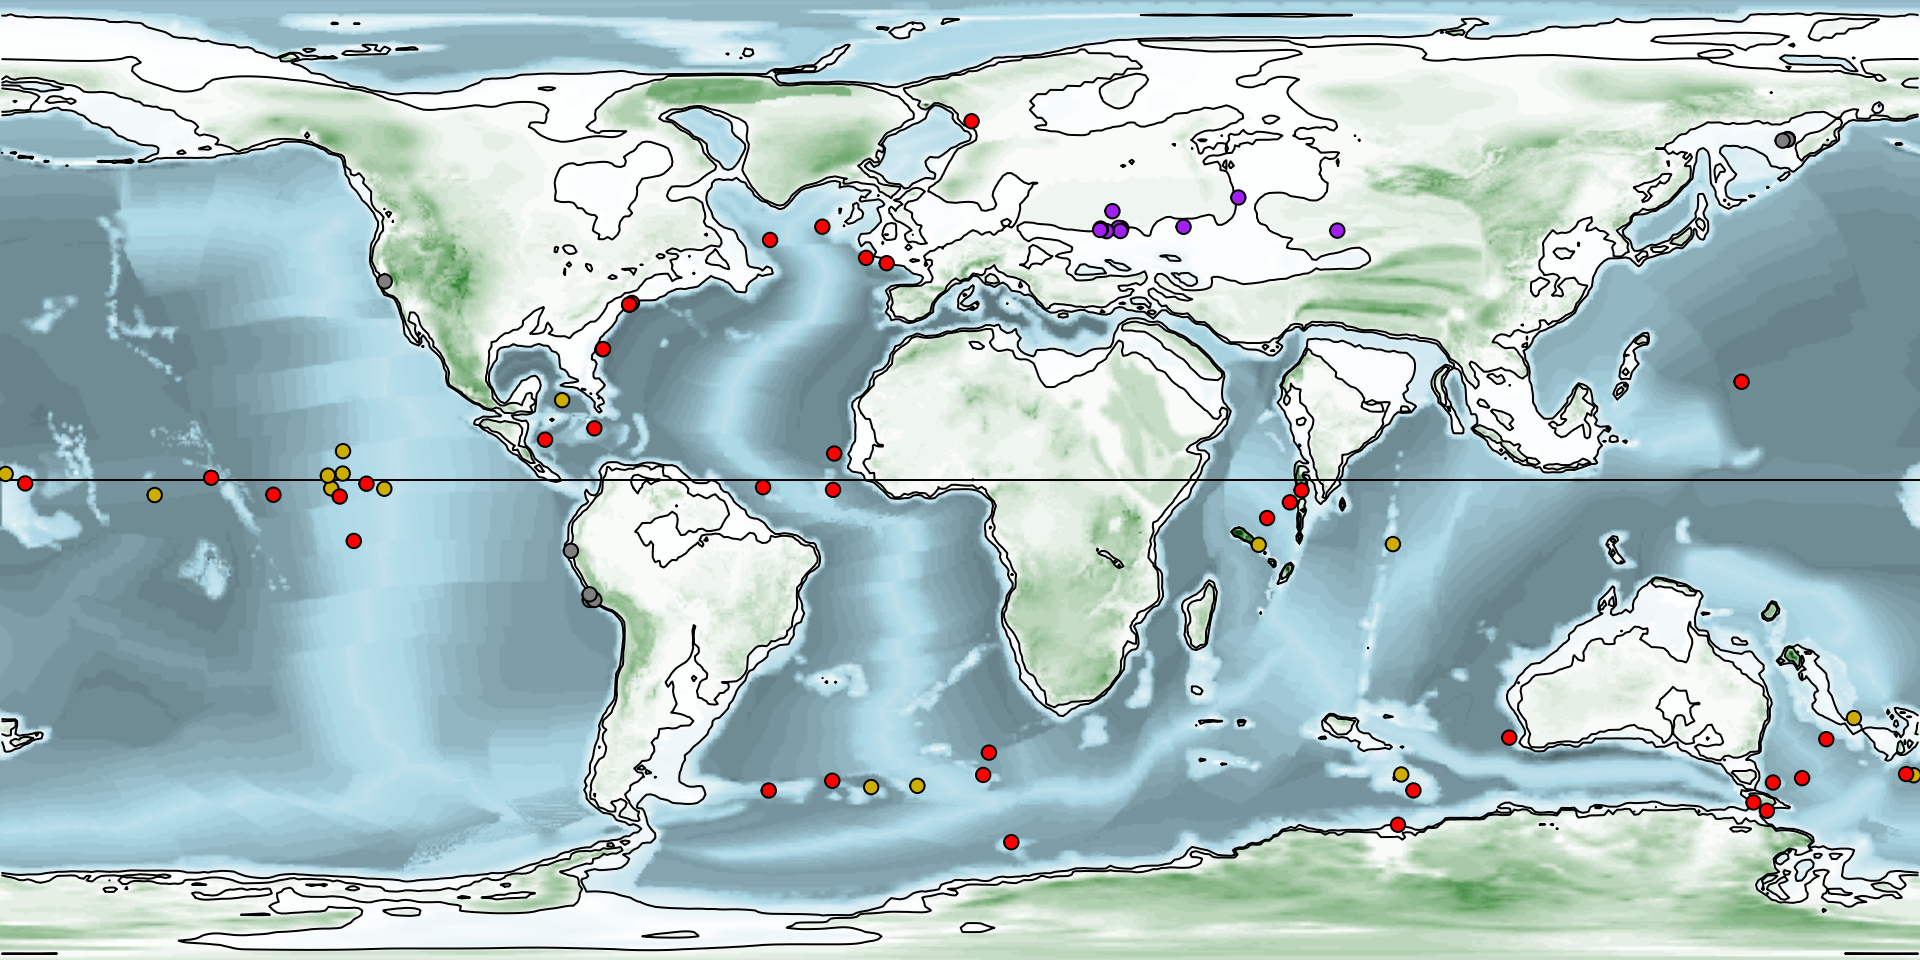

Supplement: Supplementary file 24 [file bg-22-3029-2025-supplement.zip]

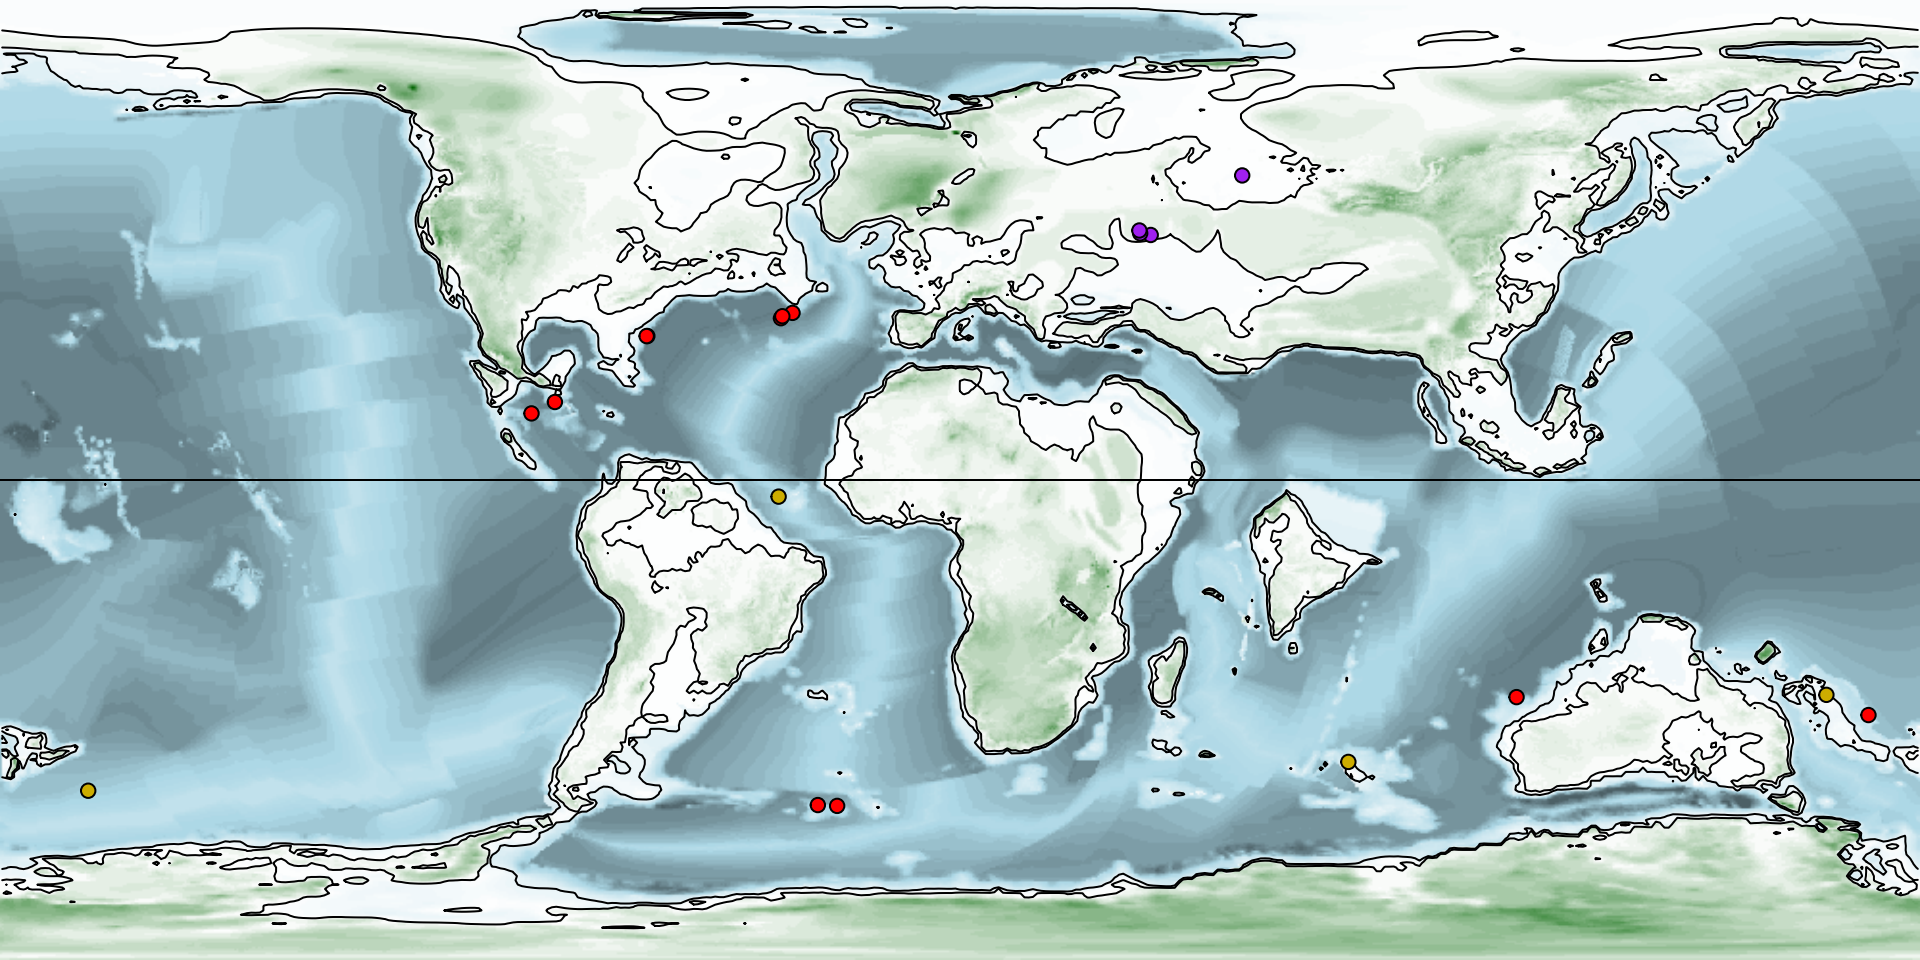

Supplement: Supplementary file 25 [file bg-22-3029-2025-supplement.zip]

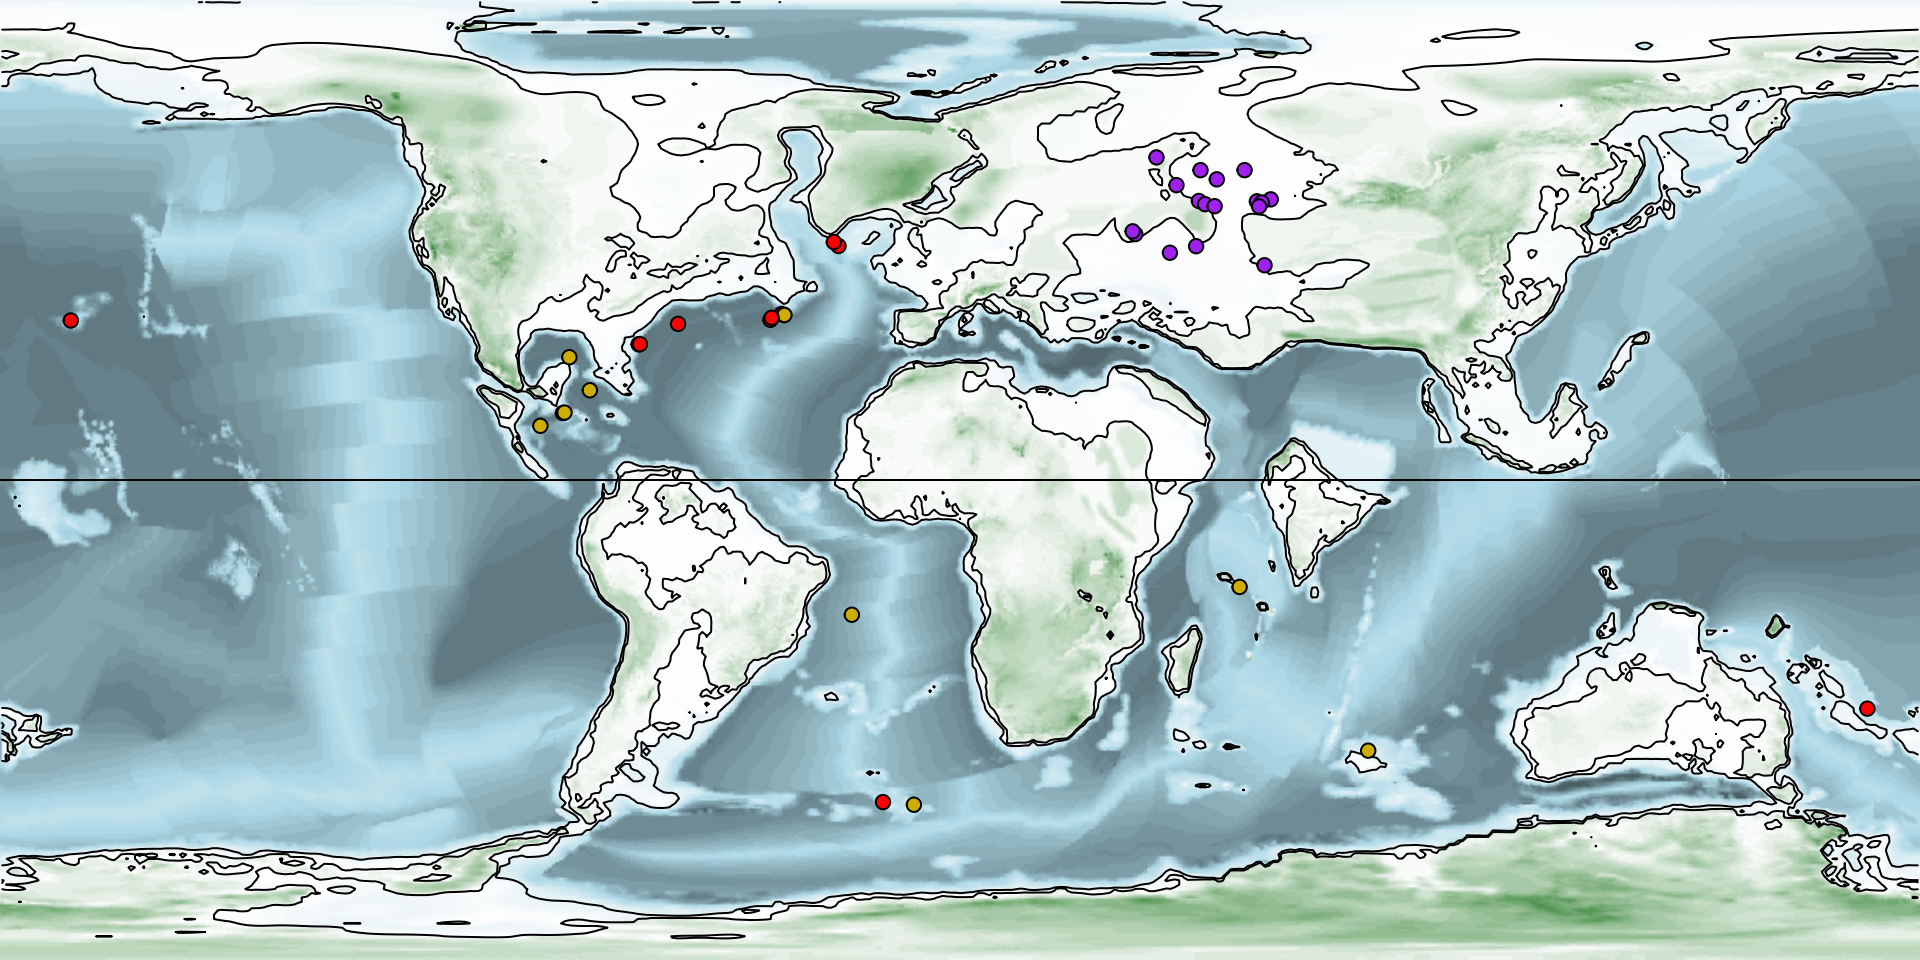

Supplement: Supplementary file 26 [file bg-22-3029-2025-supplement.zip]

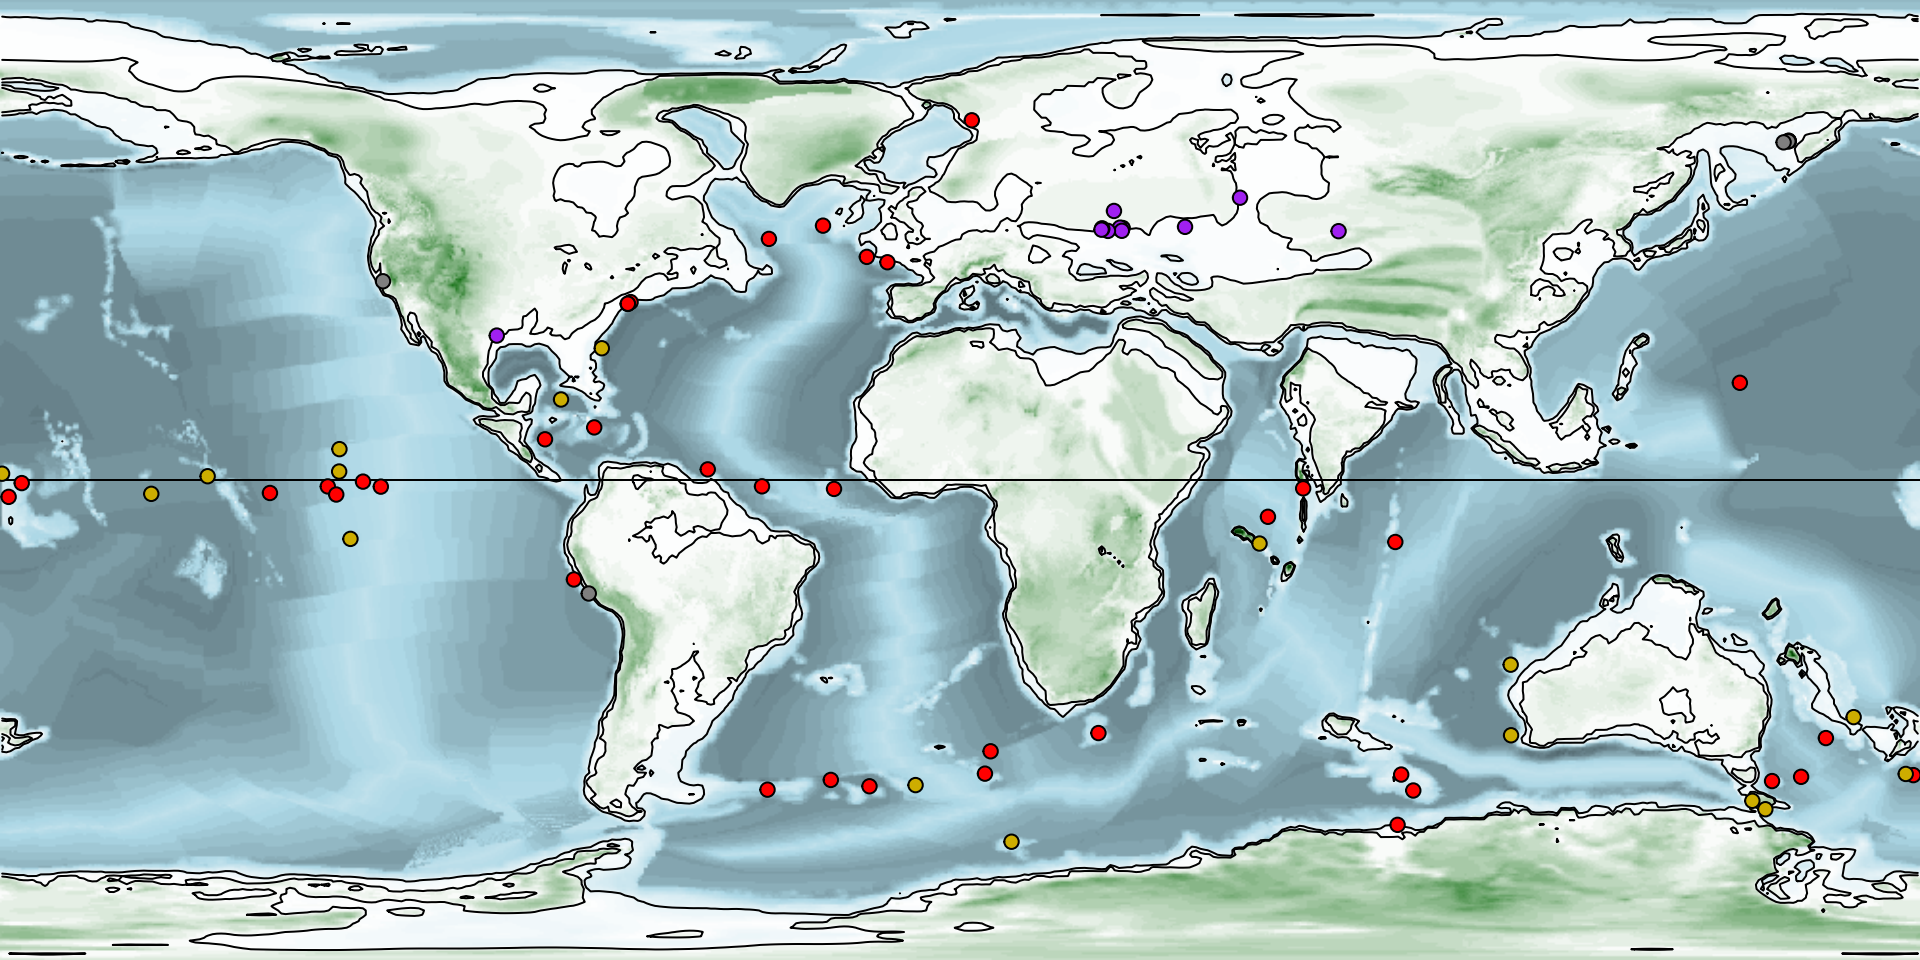

Supplement: Supplementary file 27 [file bg-22-3029-2025-supplement.zip]

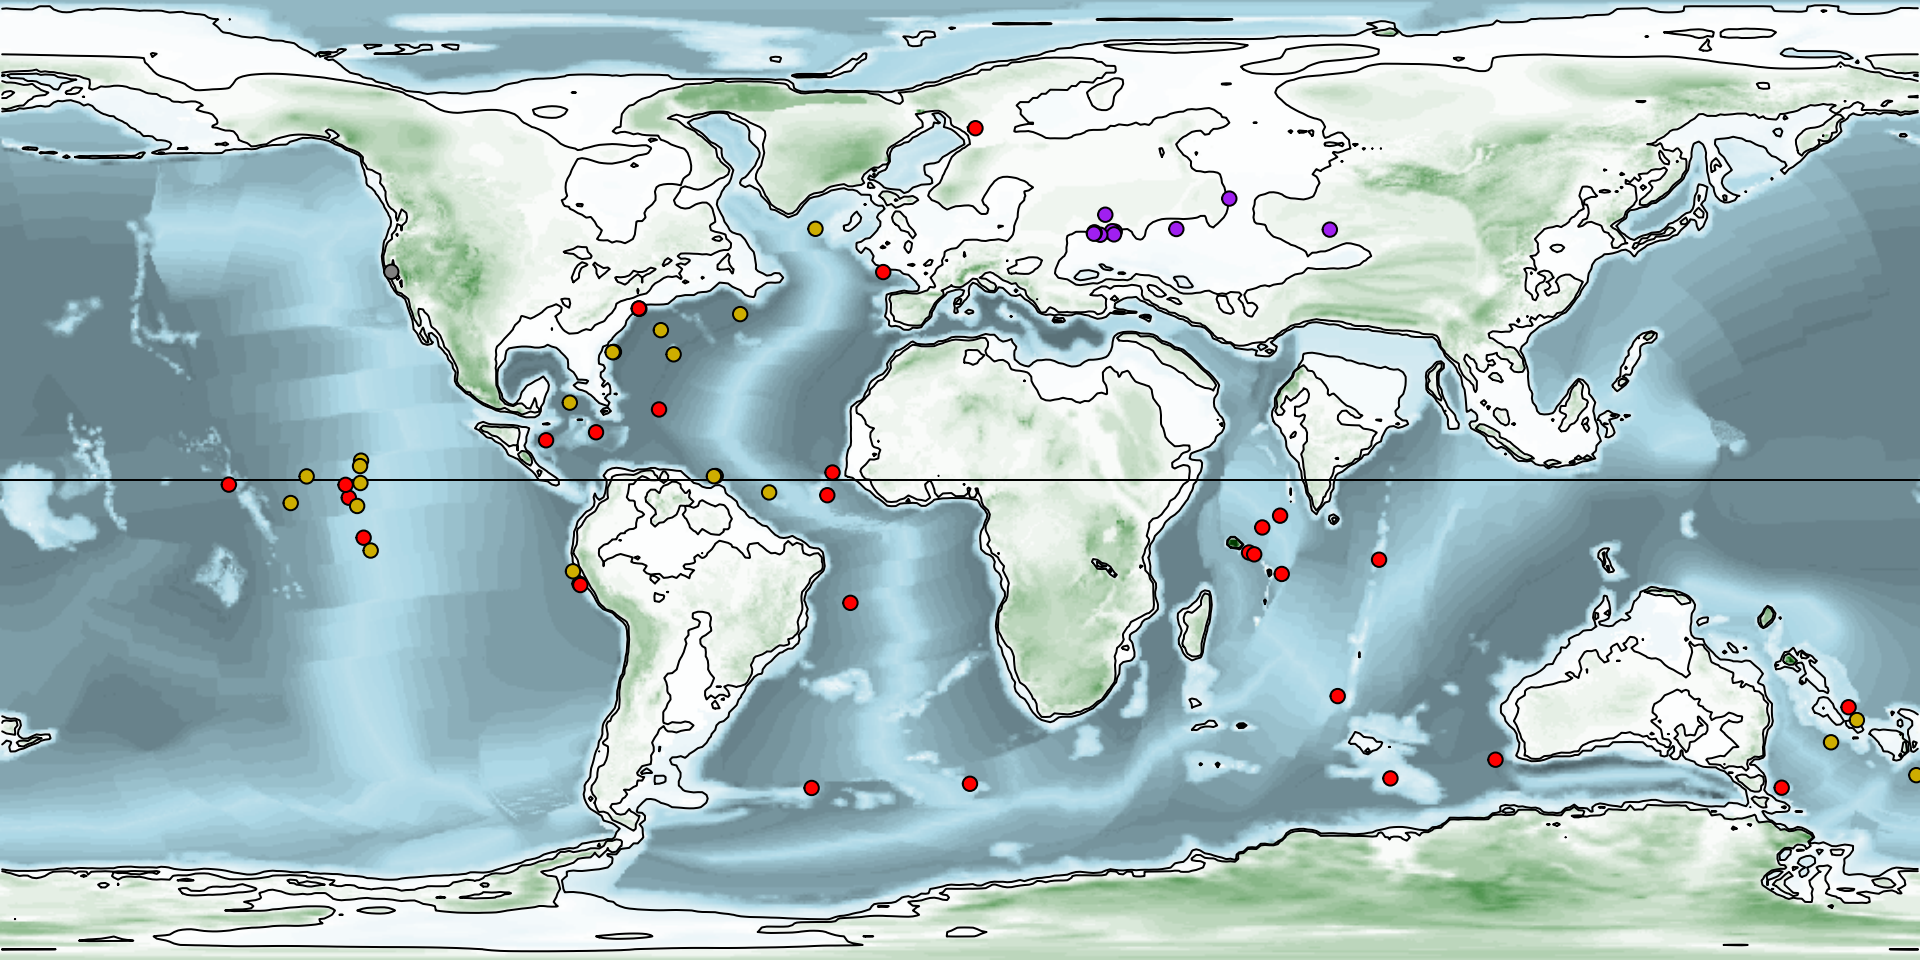

Supplement: Supplementary file 28 [file bg-22-3029-2025-supplement.zip]

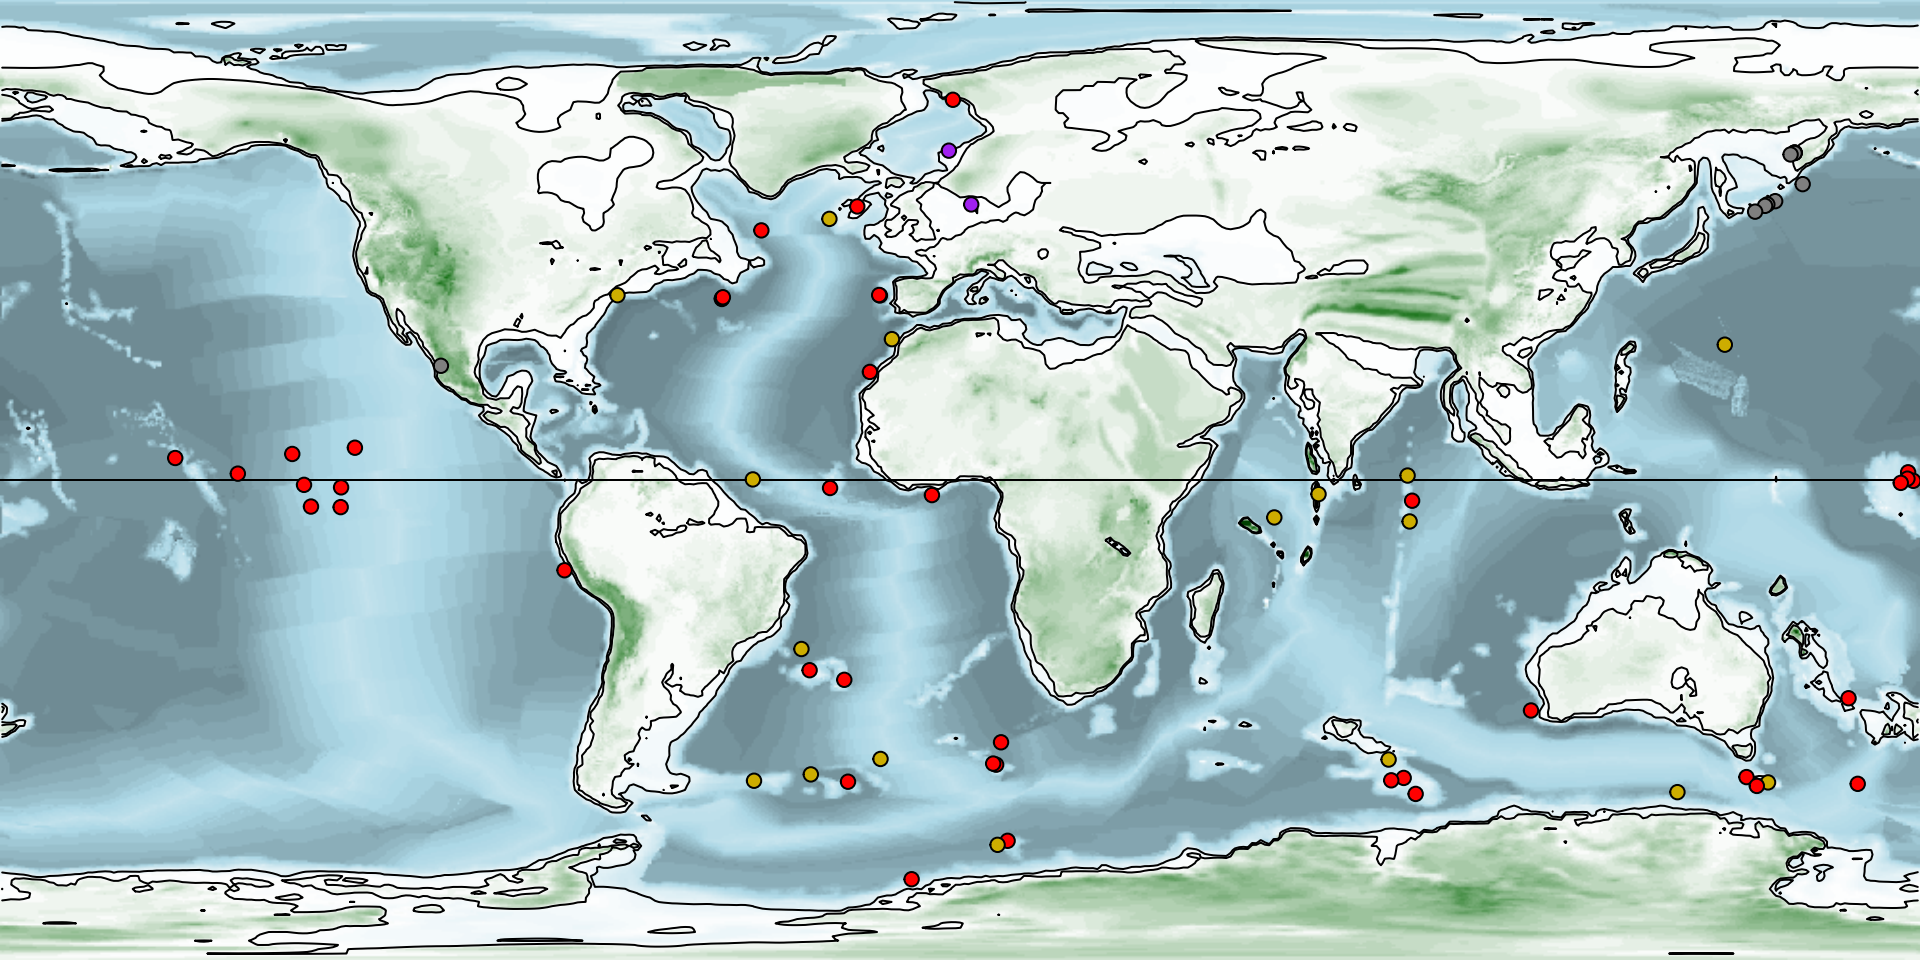

Supplement: Supplementary file 29 [file bg-22-3029-2025-supplement.zip]

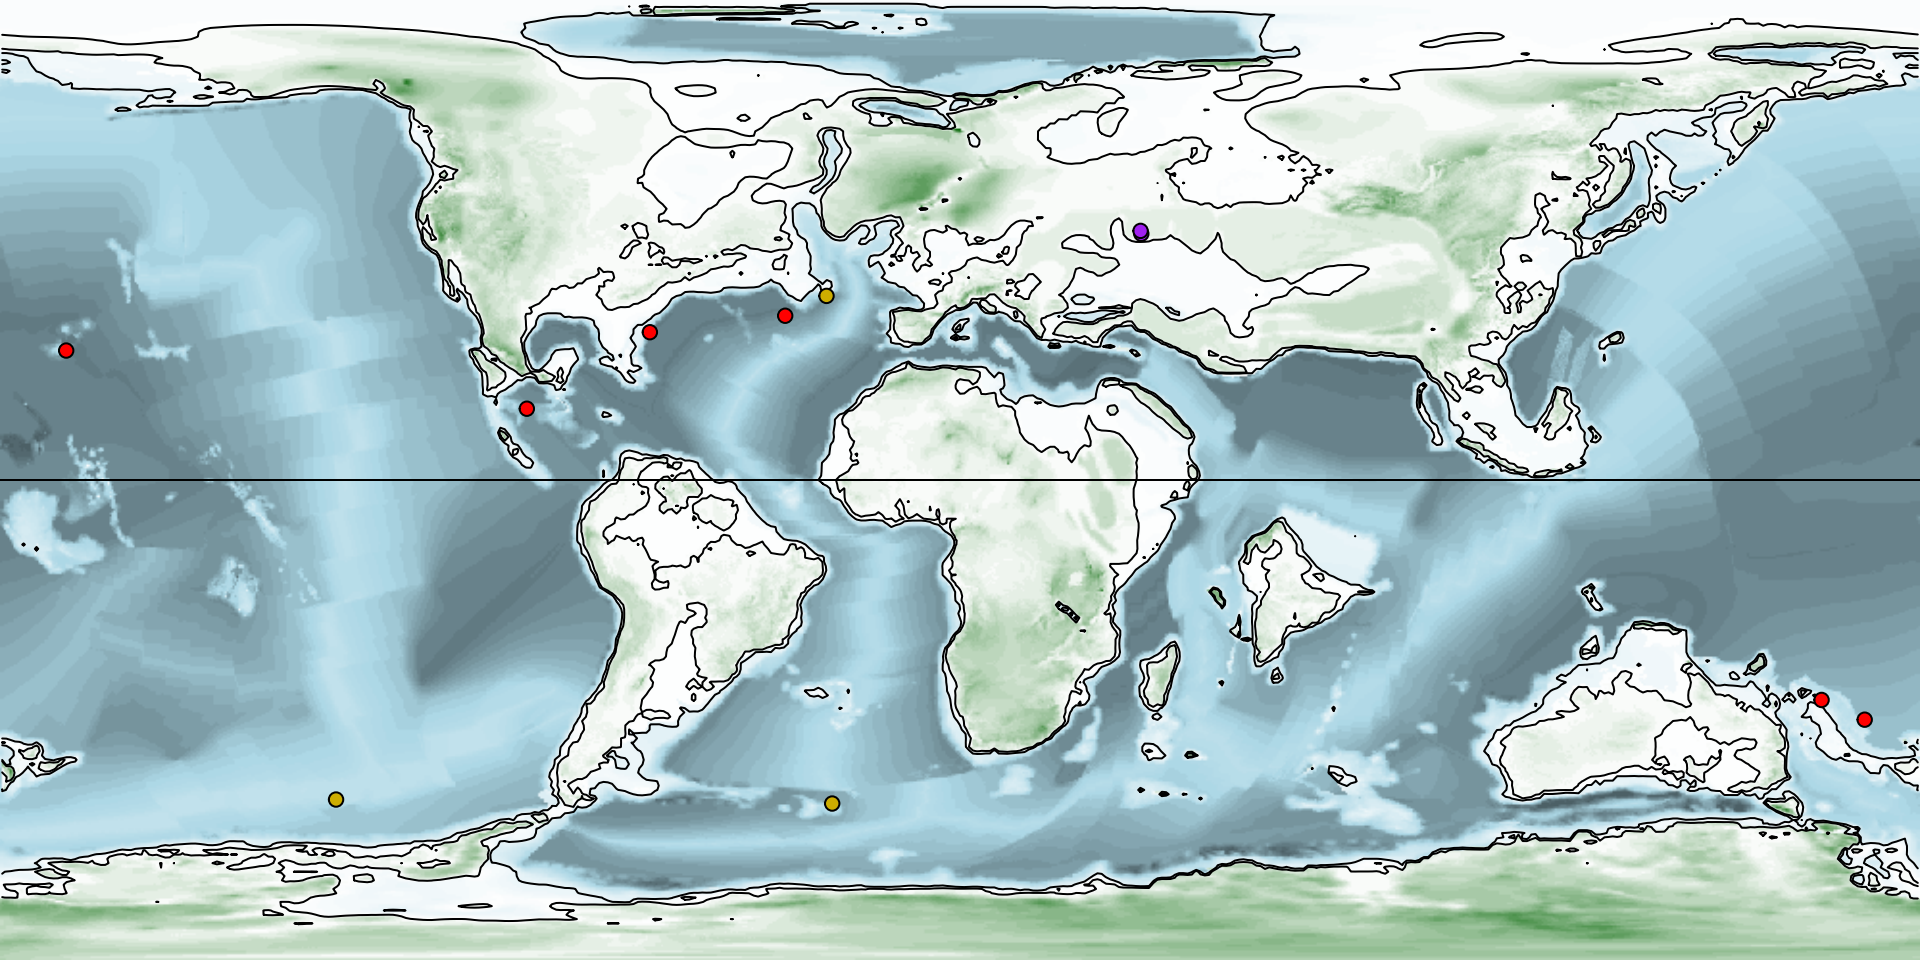

Supplement: Supplementary file 30 [file bg-22-3029-2025-supplement.zip]

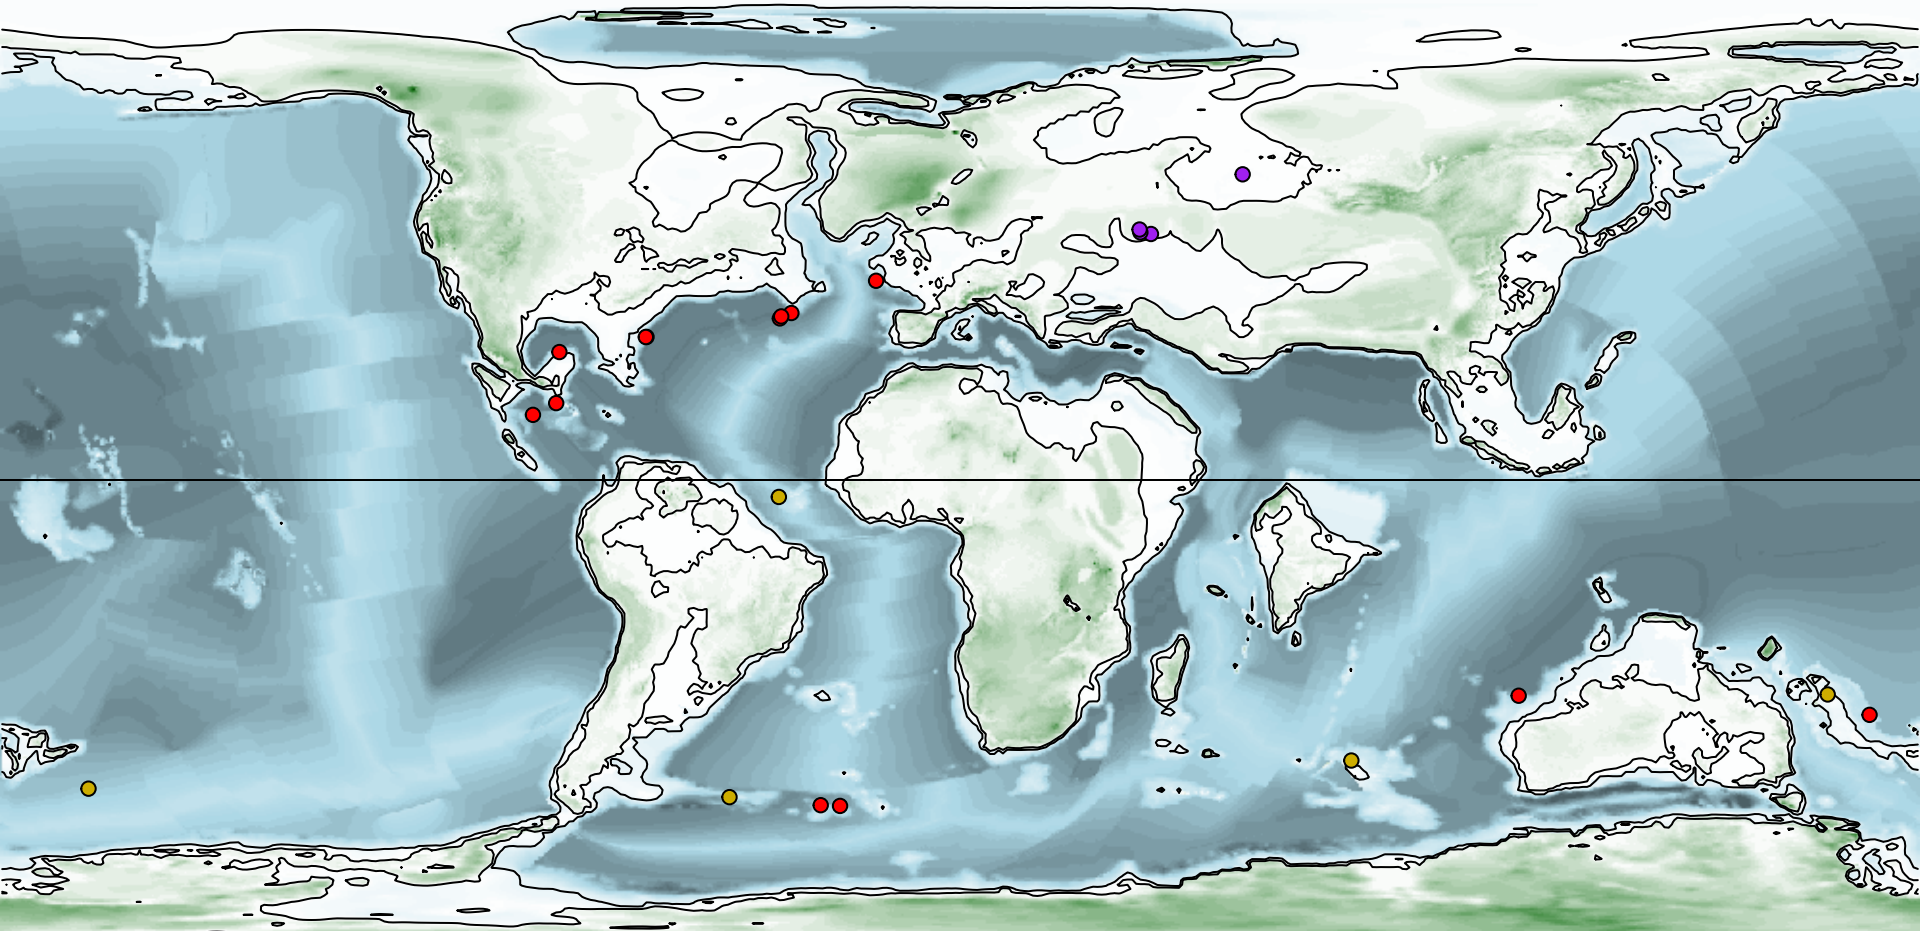

Supplement: Supplementary file 31 [file bg-22-3029-2025-supplement.zip]

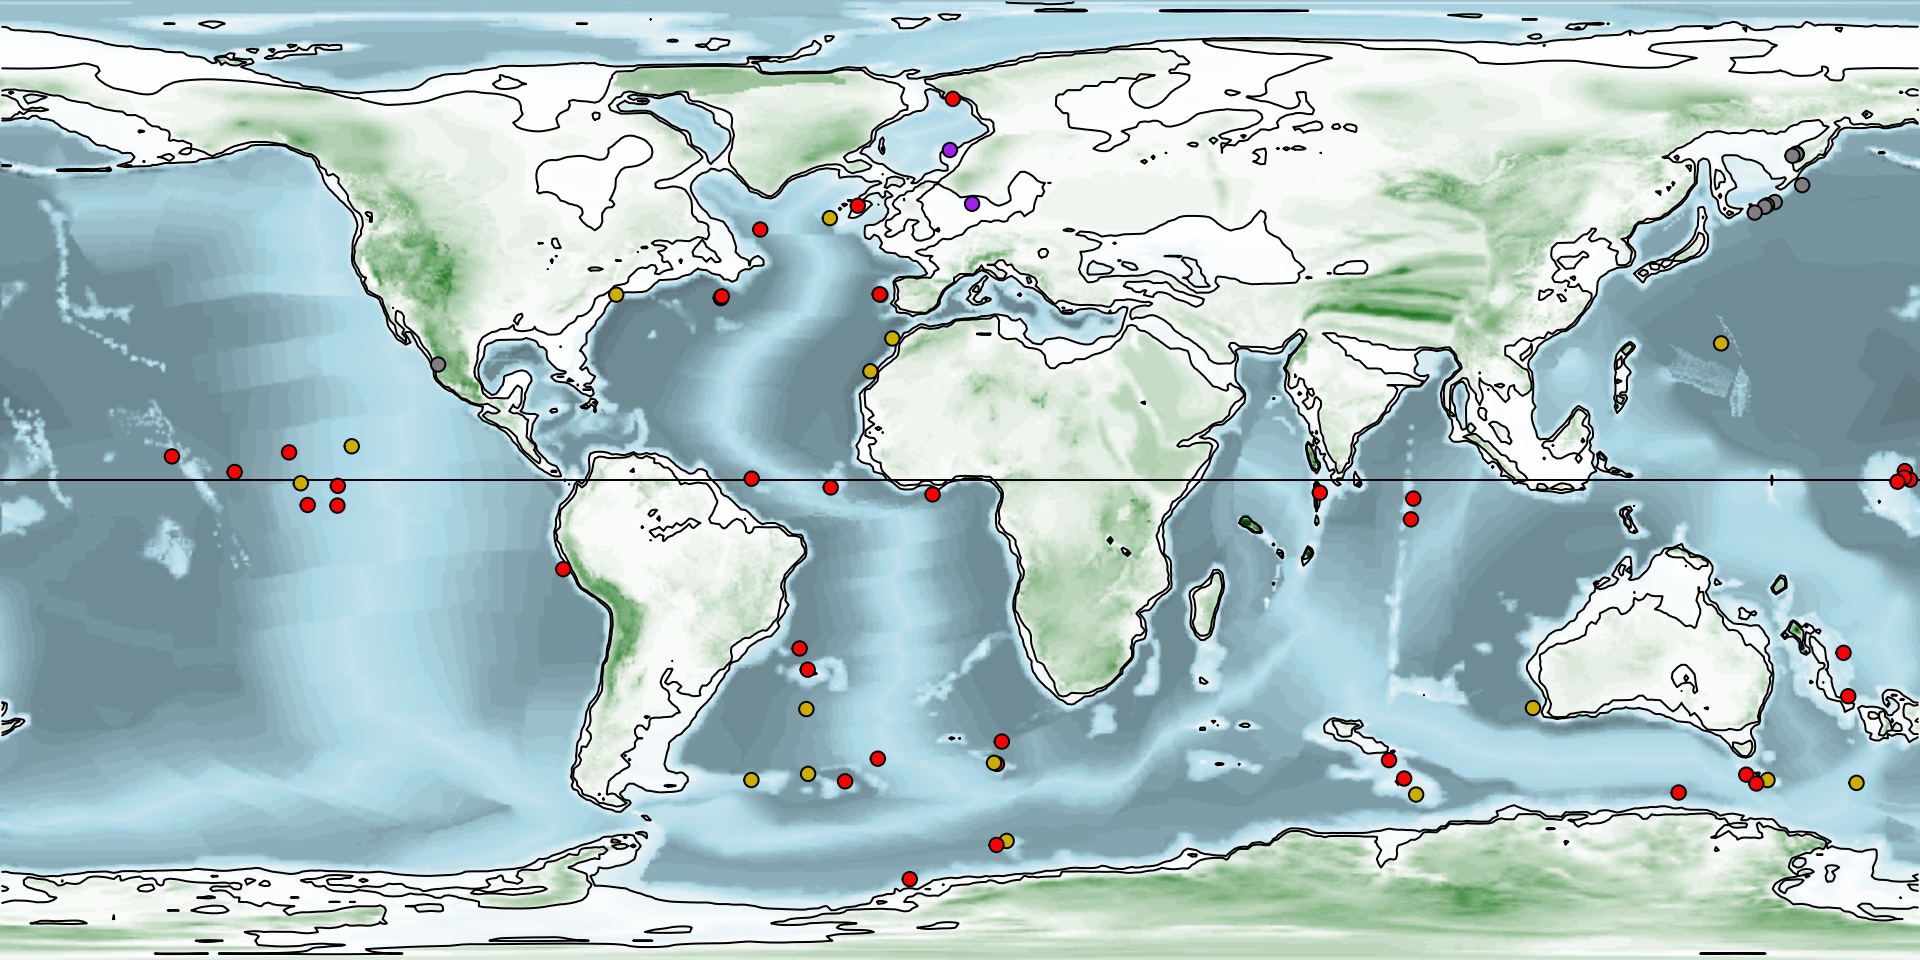

Supplement: Supplementary file 33 [file bg-22-3029-2025-supplement.zip]

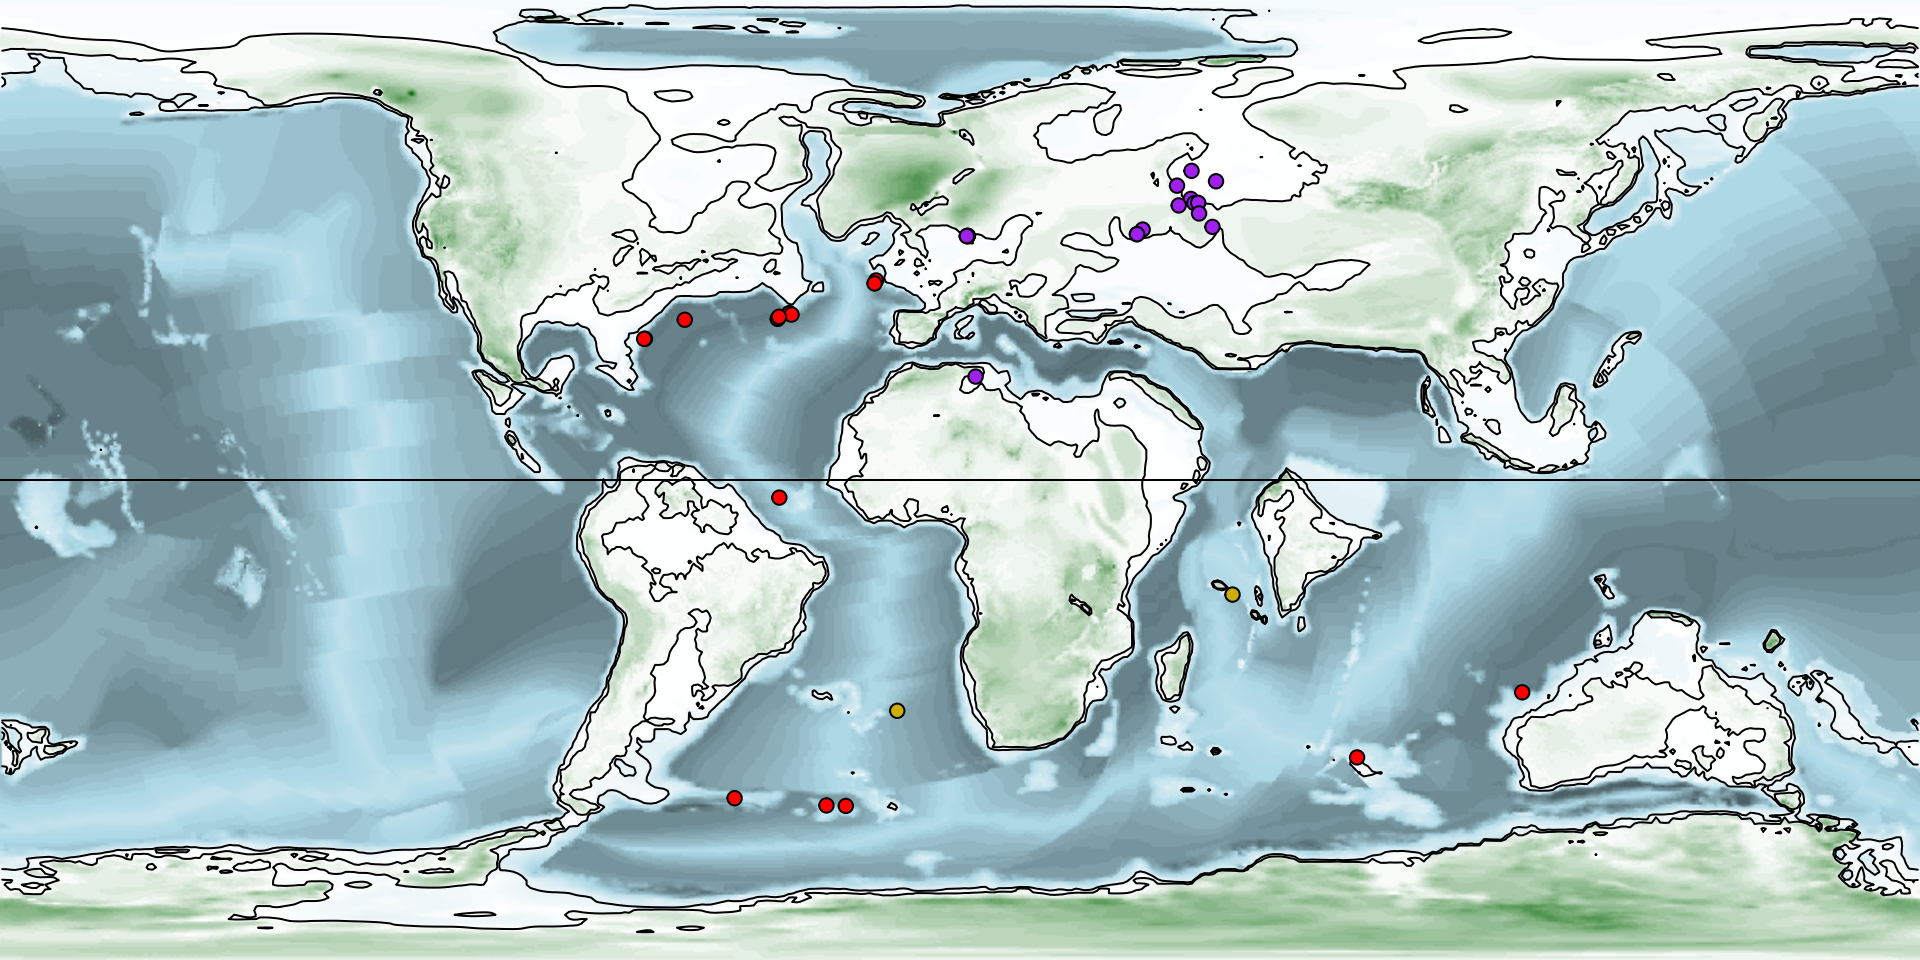

Supplement: Supplementary file 34 [file bg-22-3029-2025-supplement.zip]

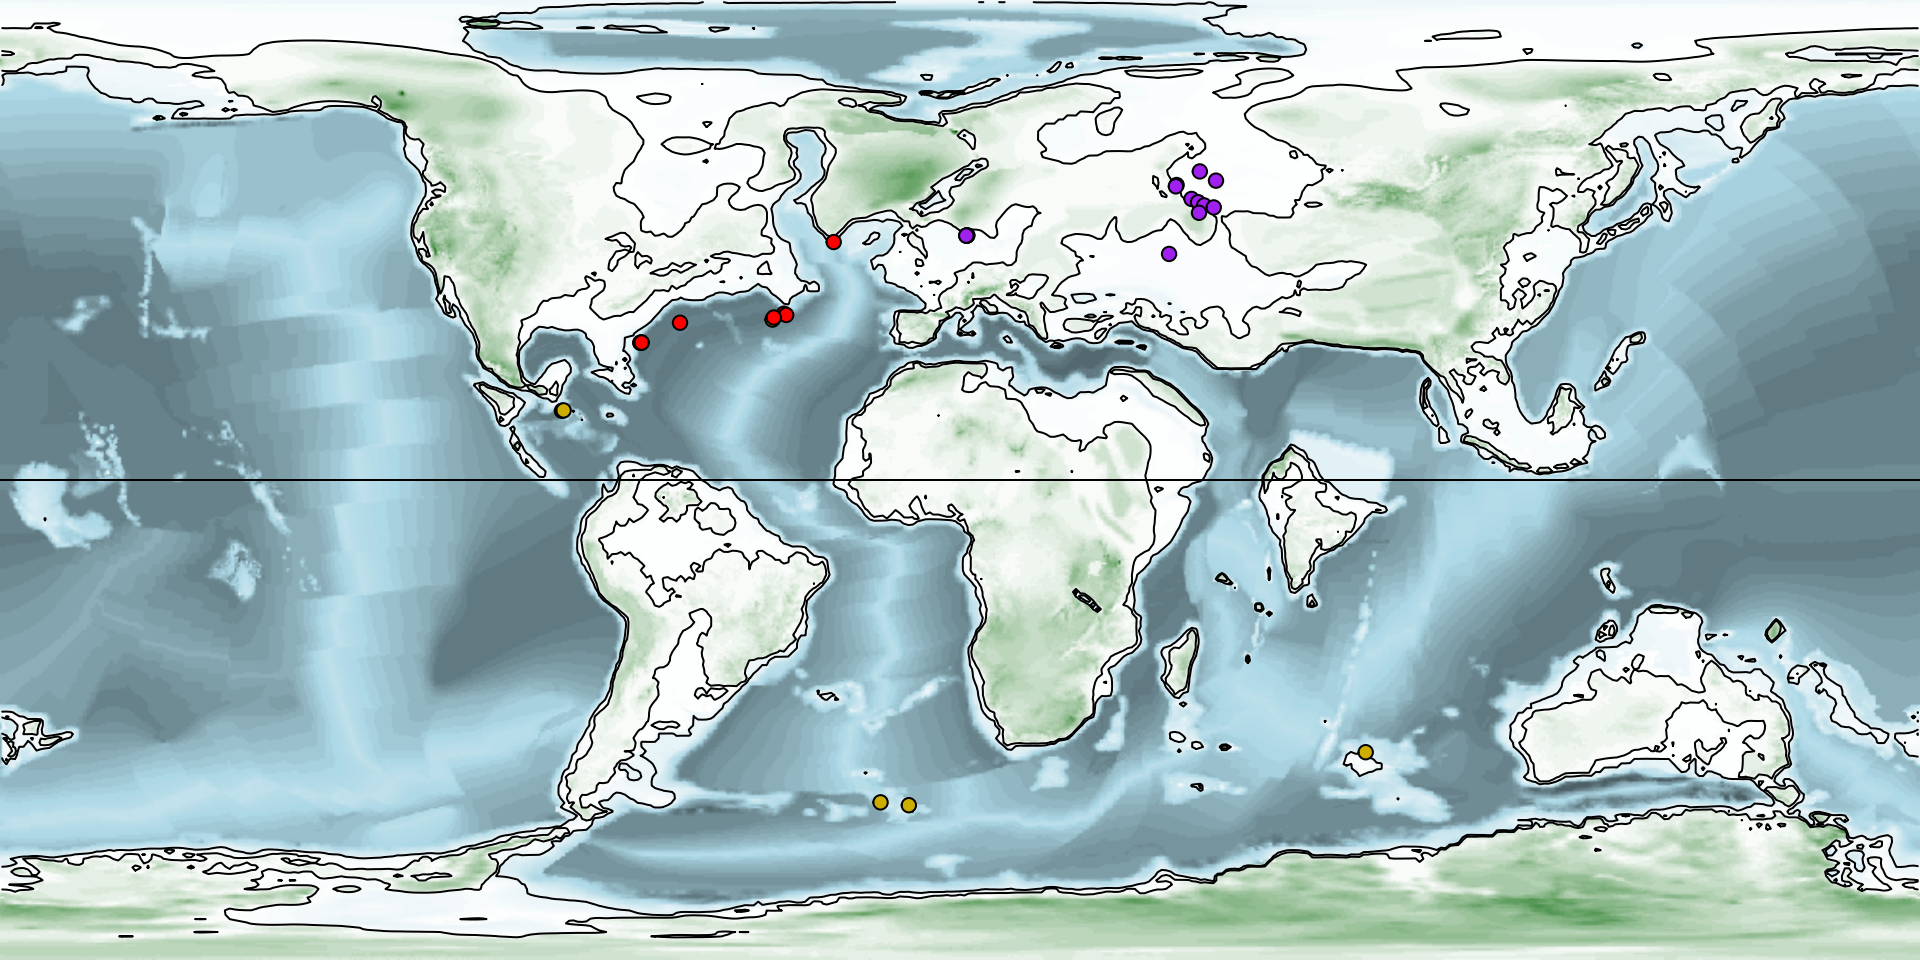

Supplement: Supplementary file 35 [file bg-22-3029-2025-supplement.zip]

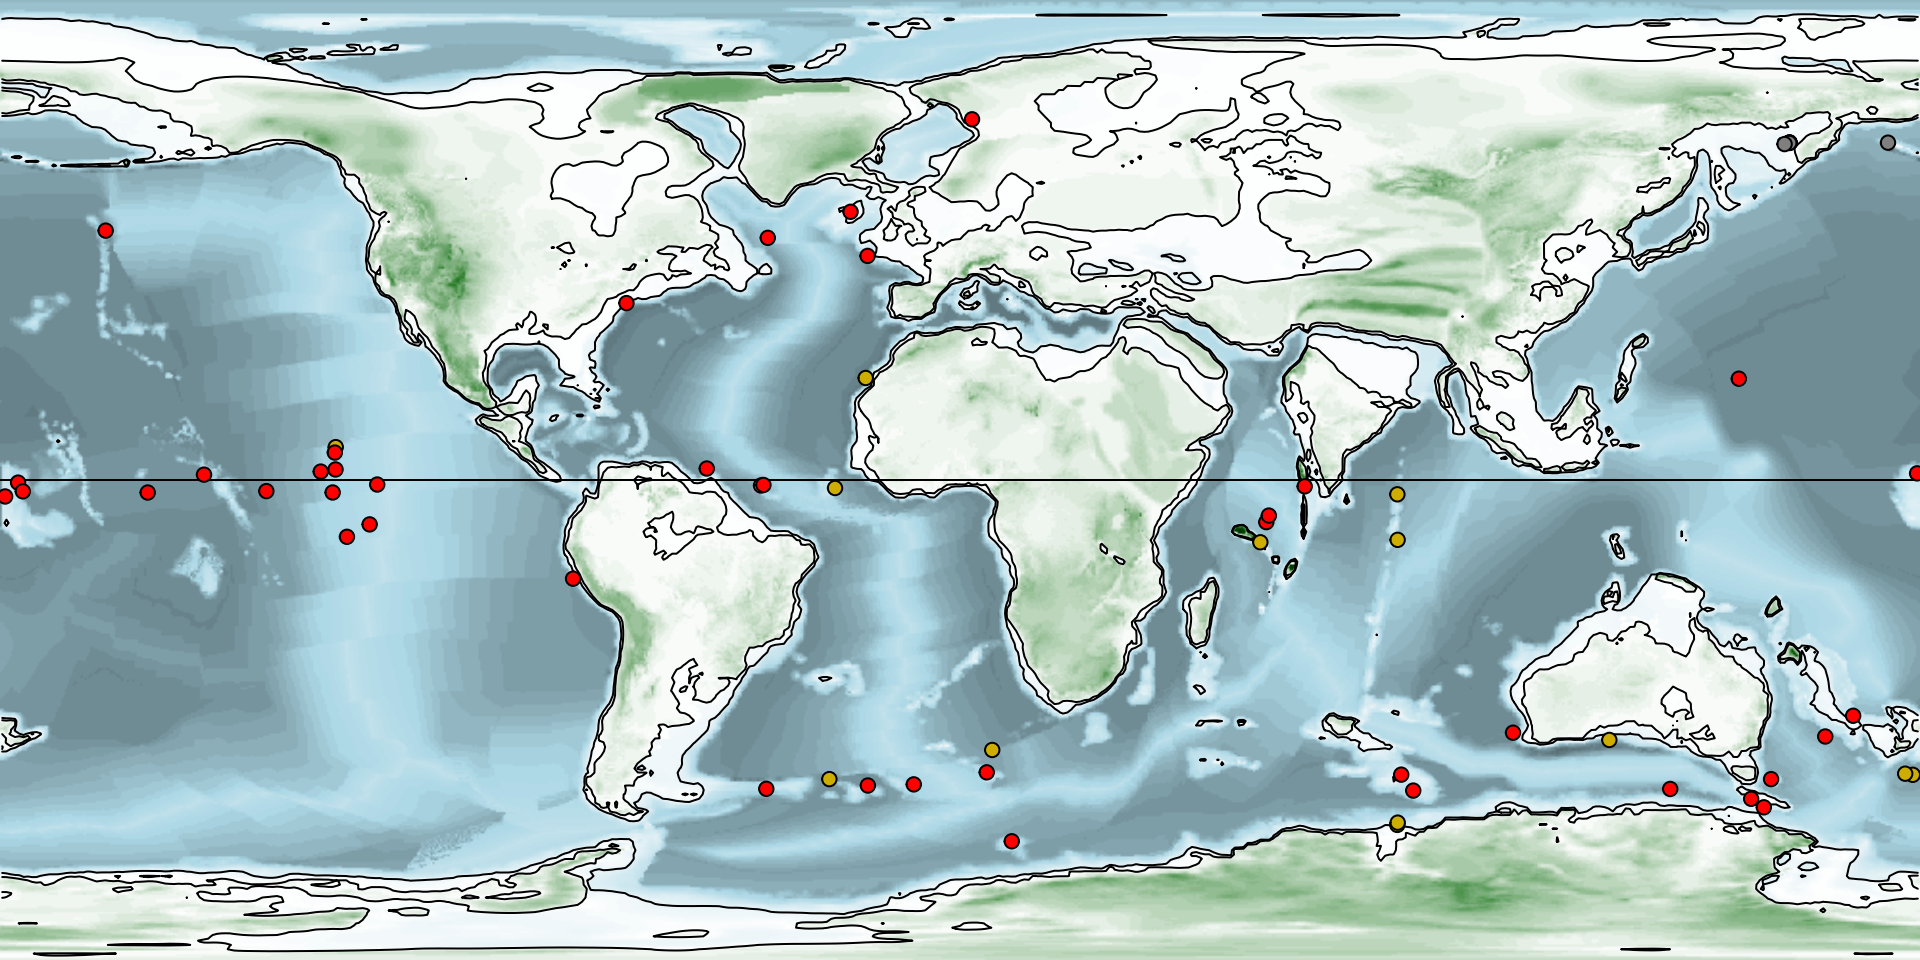

Supplement: Supplementary file 36 [file bg-22-3029-2025-supplement.zip]

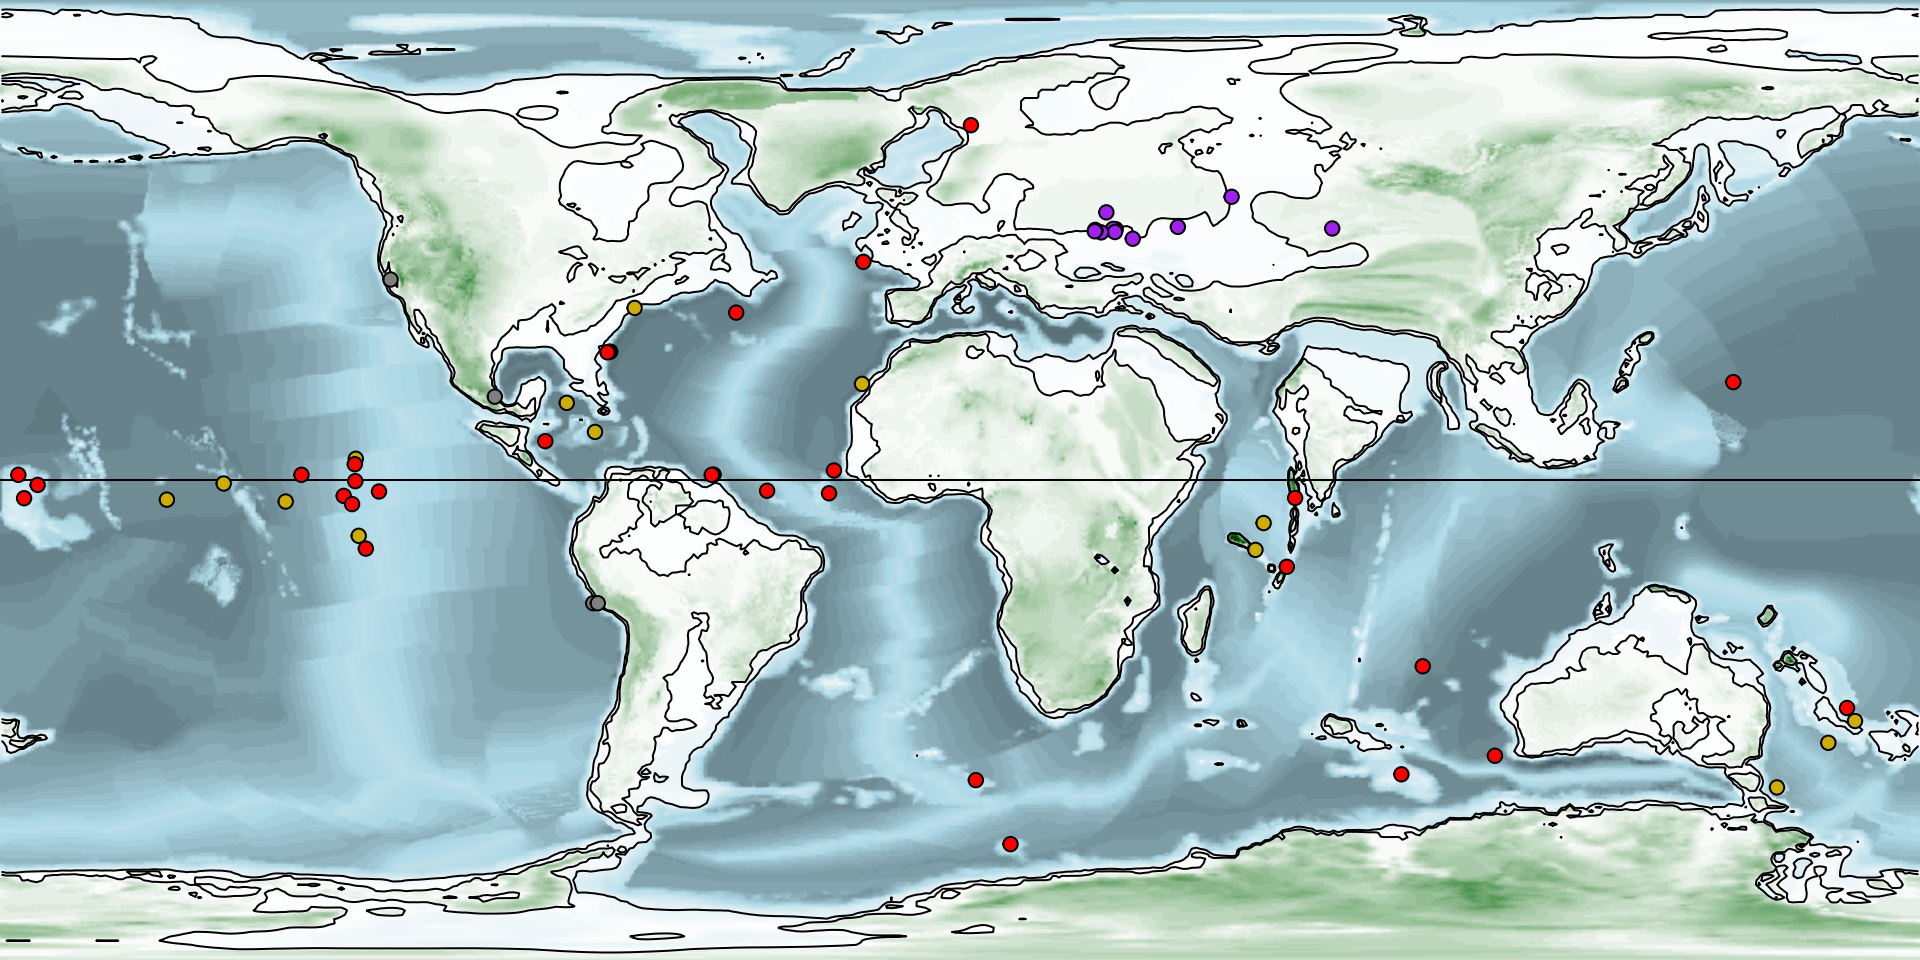

Supplement: Supplementary file 37 [file bg-22-3029-2025-supplement.zip]

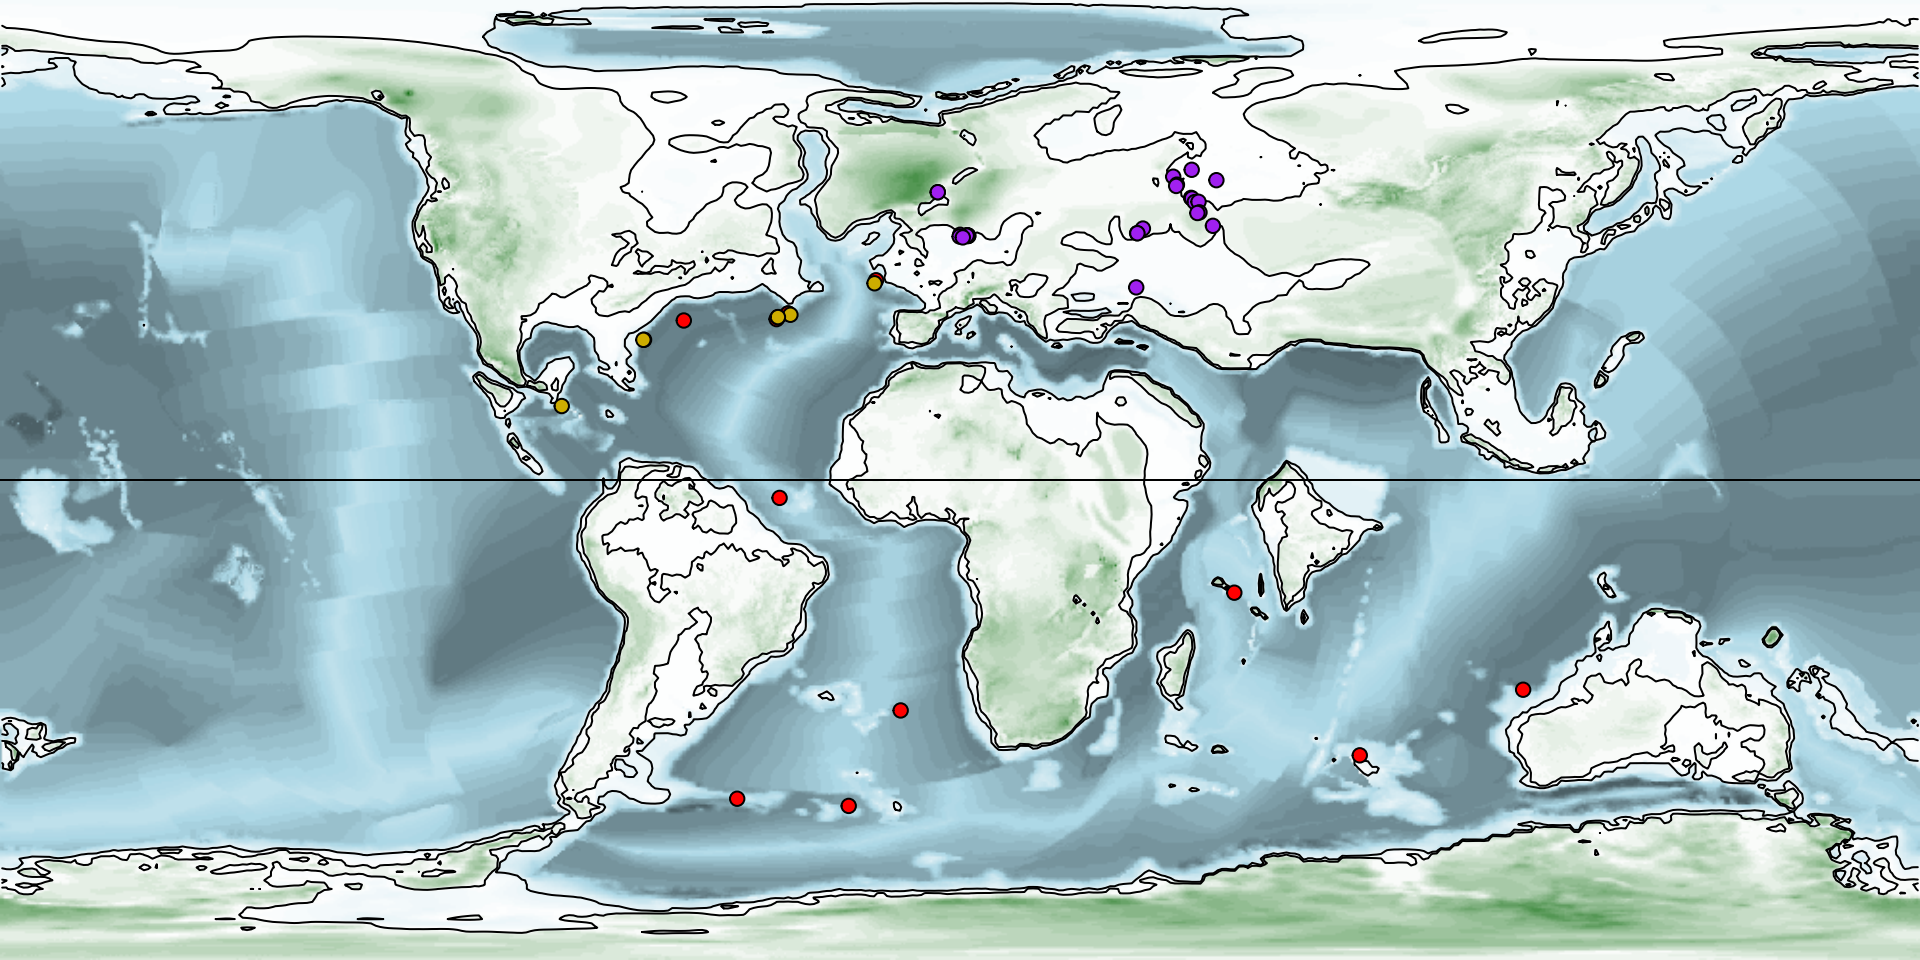

Supplement: Supplementary file 38 [file bg-22-3029-2025-supplement.zip]

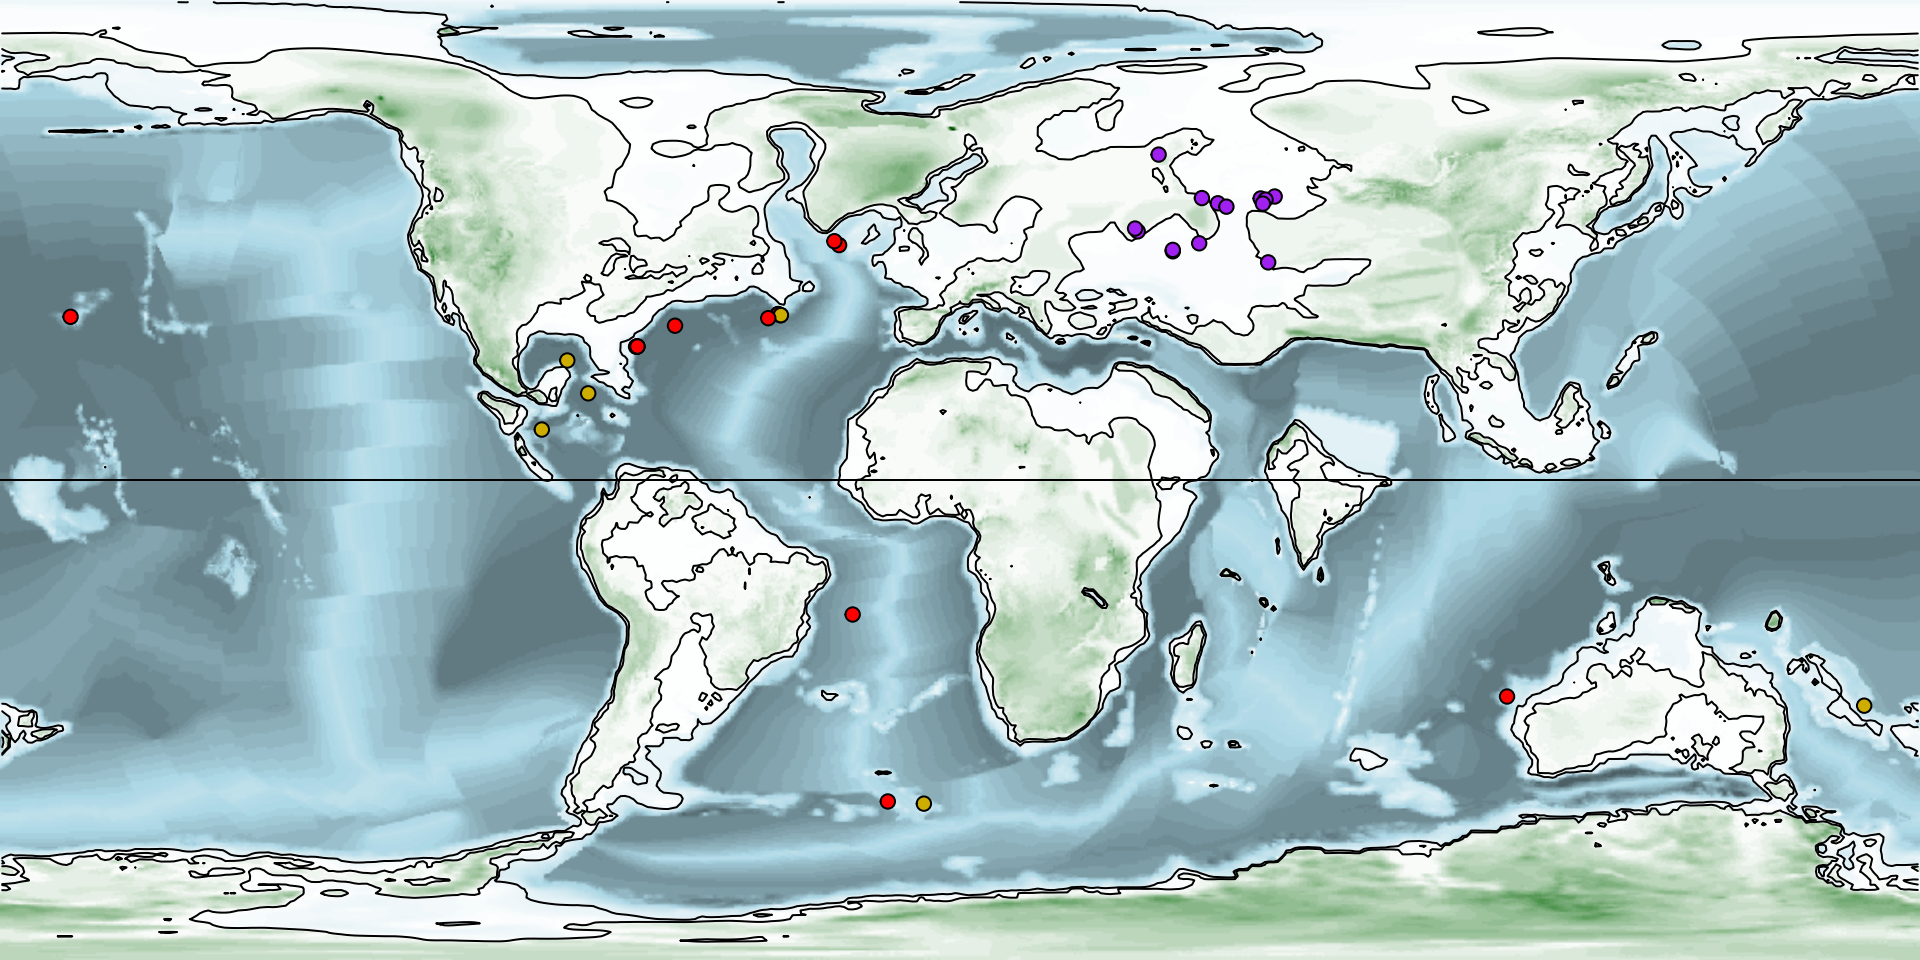

Supplement: Supplementary file 39 [file bg-22-3029-2025-supplement.zip]

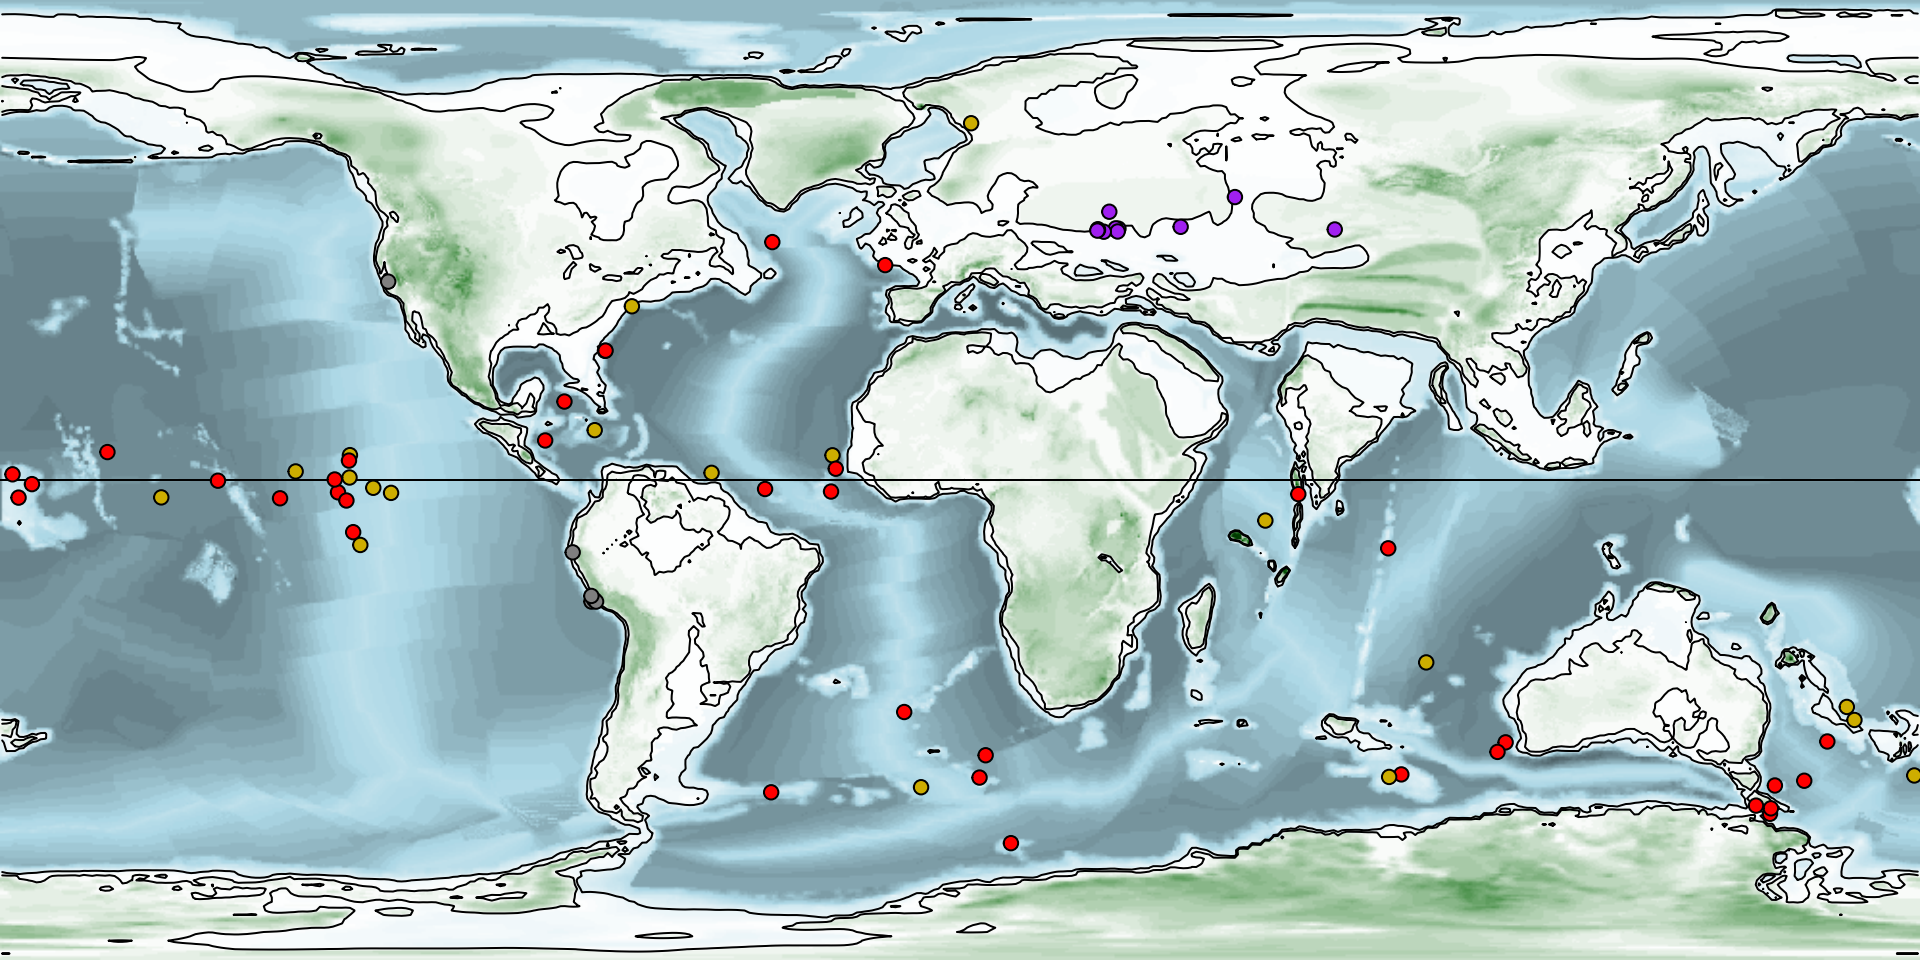

Supplement: Supplementary file 40 [file bg-22-3029-2025-supplement.zip]

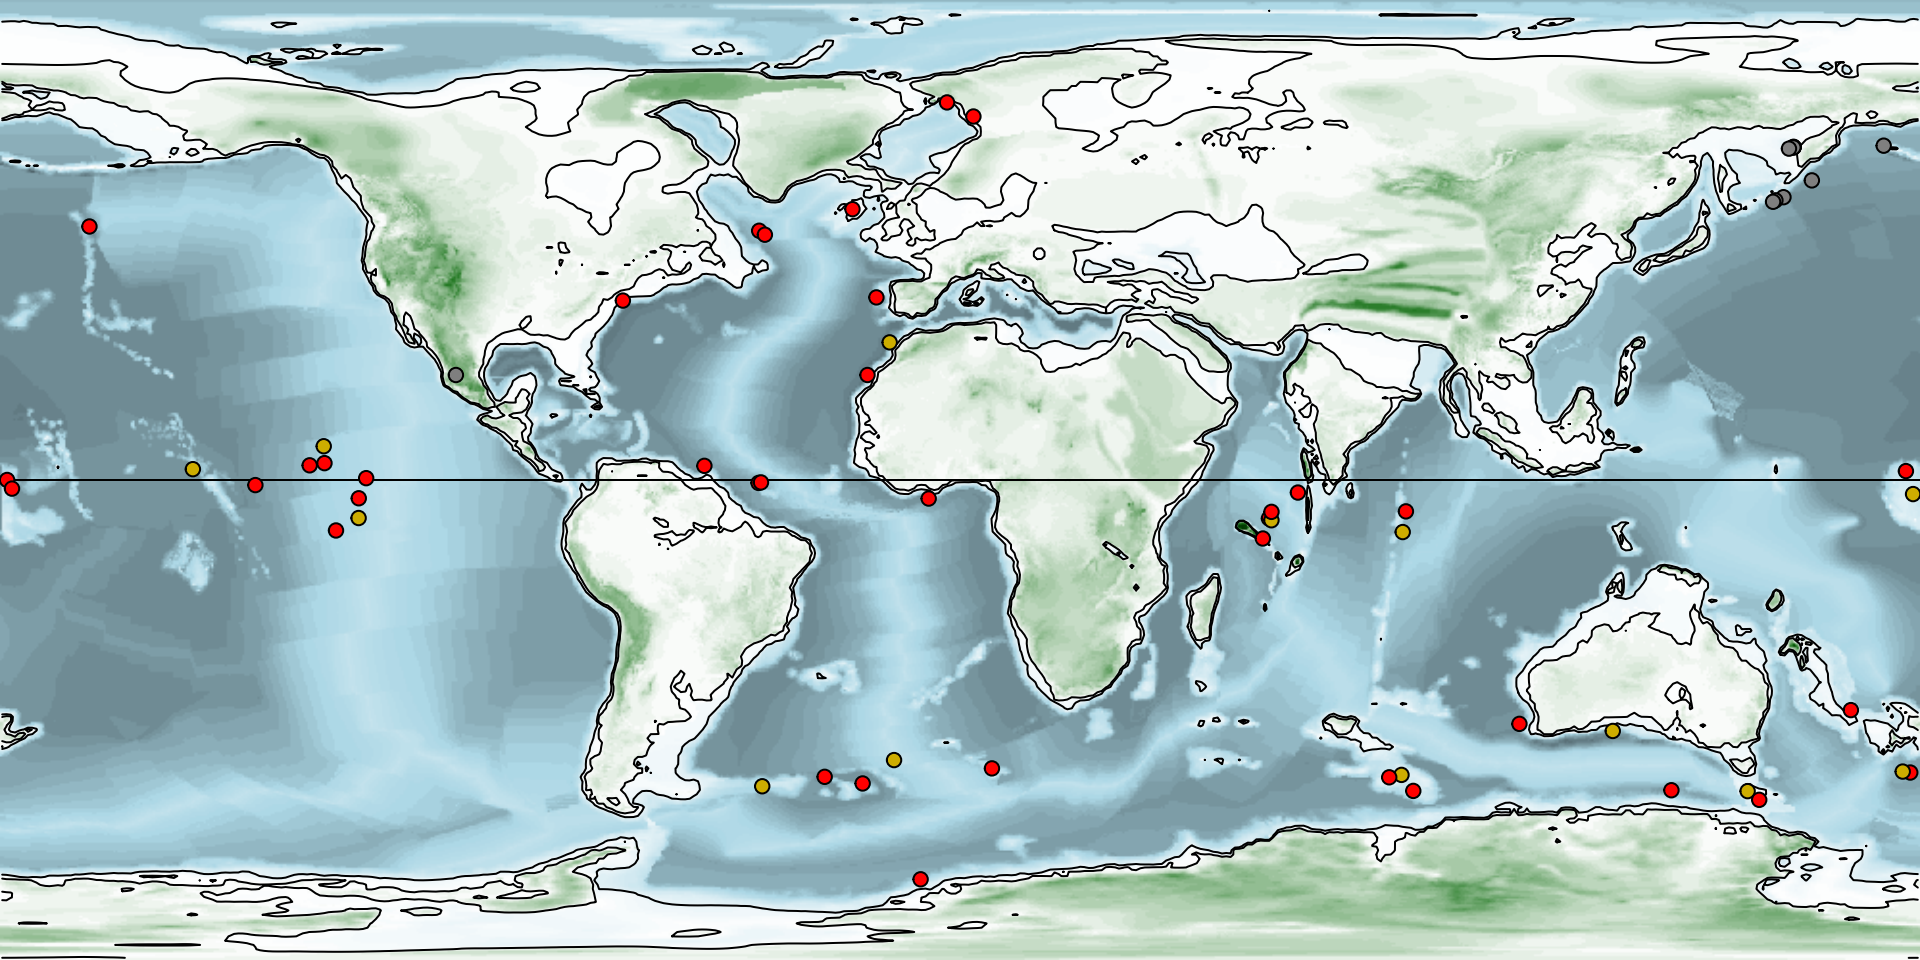

Supplement: Supplementary file 41 [file bg-22-3029-2025-supplement.zip]

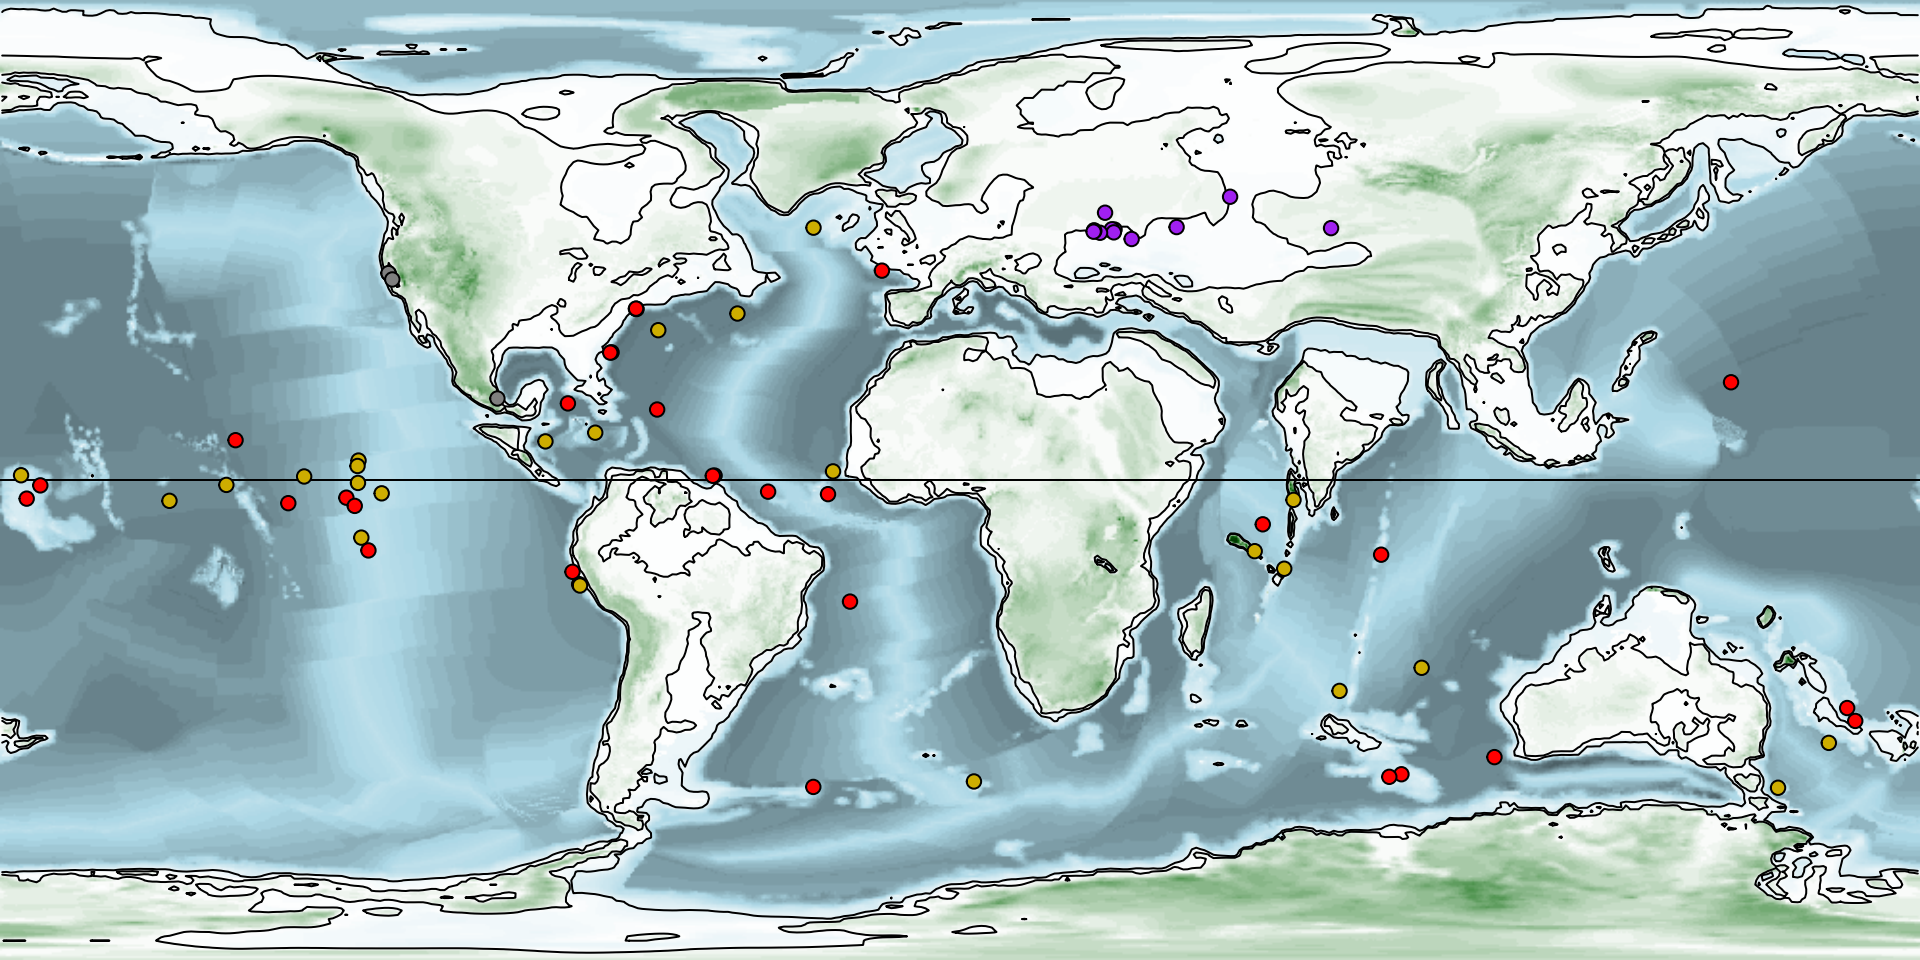

Supplement: Supplementary file 42 [file bg-22-3029-2025-supplement.zip]

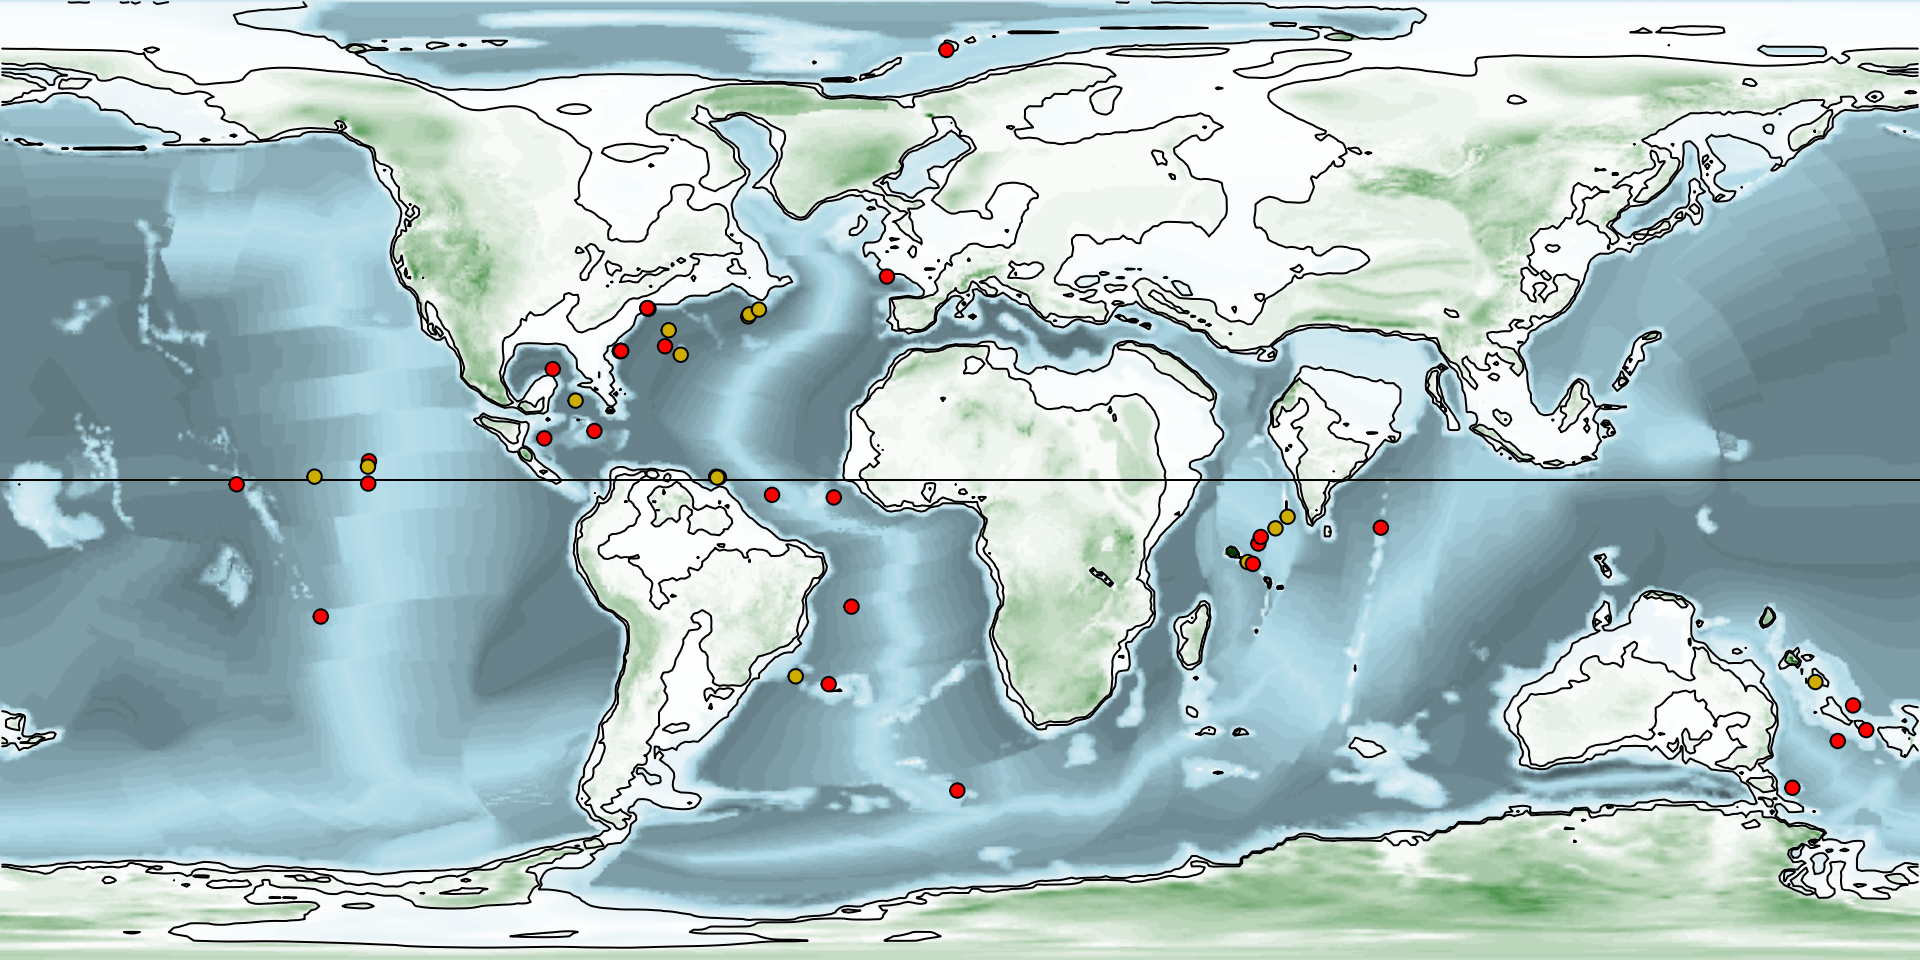

Supplement: Supplementary file 43 [file bg-22-3029-2025-supplement.zip]

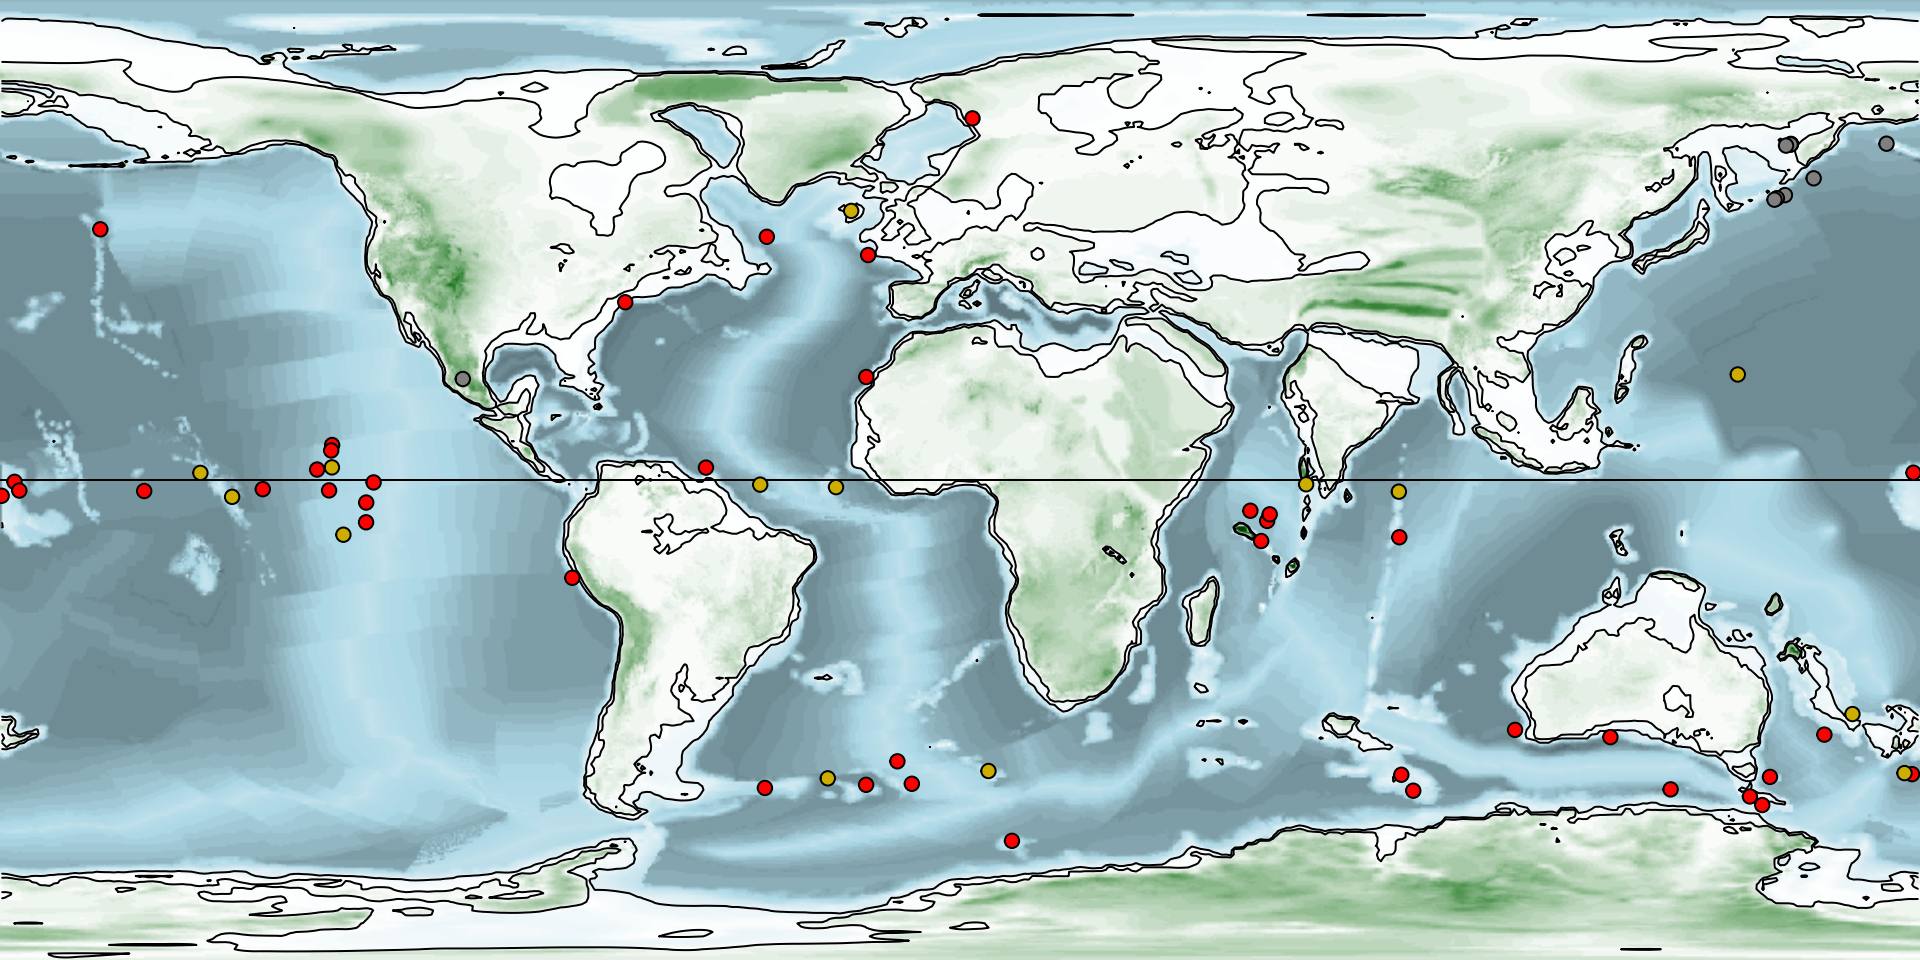

Supplement: Supplementary file 44 [file bg-22-3029-2025-supplement.zip]
